# Supplementary material
Source: PubMed Central journal article supplement (PMC5710373)
Supplement: jamapediatr-e173036-s001.pdf [file jamapediatr-e173036-s001.pdf]

## Supplementary Online Content

Wang Z, Whiteside SPH, Sim L, et al. Comparative effectiveness and safety of cognitive behavioral therapy and pharmacotherapy for childhood anxiety disorders: a systematic review and meta-analysis. *JAMA Pediatr*. Published online August 31, 2017.  
doi:10.1001/jamapediatrics.2017.3036

**eAppendix.** Search strategy

**eFigure 1.** Flow chart

**eFigure 2.** Risk of bias assessment for randomized control trials

**eFigure 3.** Risk of bias assessment for nonrandomized comparative studies

**eTable 1.** Characteristics of the included studies comparing medications vs pill placebo

**eTable 2.** Characteristics of the included studies comparing medications vs medications

**eTable 3.** Characteristics of the included studies comparing CBT vs medications

**eTable 4.** Characteristics of the included studies comparing CBT vs wait-listing/no treatment

**eTable 5.** Characteristics of the included studies comparing CBT vs pill placebo

**eTable 6.** Characteristics of the included studies comparing CBT vs attention control/treatment as usual

**eTable 7.** Characteristics of studies evaluating combination of CBT with medications vs CBT

**eTable 8.** Characteristics of single-cohort observational studies with adverse events

**eTable 9.** Pooled effect size and quality of evidence for primary anxiety symptoms (measured by clinician, child, and parent)

**eTable 10.** Pairwise comparison for primary anxiety symptoms (clinician report) by medication class

**eTable 11.** Pairwise comparison for primary anxiety symptoms (clinician report) by medication

**eTable 12.** Pairwise comparison for primary anxiety symptoms (child report) by medication class

**eTable 13.** Pairwise comparison for primary anxiety symptoms (child report) by medication

**eTable 14.** Pairwise comparison for primary anxiety symptoms (parent report) by medication class

**eTable 15.** Pairwise comparison for primary anxiety symptoms (parent report) by medication

**eTable 16.** Pairwise comparison for remission by medication class

**eTable 17.** Pairwise comparison for remission by medication

**eTable 18.** Pairwise comparison for response by medication class

**eTable 19.** Pairwise comparison for response by medication

**eTable 20.** Network consistency test for network of primary anxiety symptoms (clinician report) by medication class

**eTable 21.** Network consistency test for network of primary anxiety symptoms (clinician report) by medication

**eTable 22.** Network consistency test for network of primary anxiety symptoms (child report) by medication class

**eTable 23.** Network consistency test for network of primary anxiety symptoms (child report) by medication

**eTable 24.** Network consistency test for network of primary anxiety symptoms (parent report) by medication class

**eTable 25.** Network consistency test for network of primary anxiety symptoms (parent report) by medication

**eTable 26.** Network consistency test for network of remission by medication class

**eTable 27.** Network consistency test for network of remission by medication

**eTable 28.** Network consistency test for network of response by medication class

**eTable 29.** Network consistency test for network of response by medication  
**eTable 30.** Pooled effect size and quality of evidence for adverse events (including dropouts, dropouts due to any adverse events, and adverse events)  
**eTable 31.** Subgroup analysis: age  
**eTable 32.** Subgroup analysis: comorbidity  
**eTable 33.** Subgroup analysis: ADHD  
**eTable 34.** Subgroup analysis: autism  
**eTable 35.** Subgroup analysis: school refusal  
**eTable 36.** Subgroup analysis: diagnosis  
**eTable 37.** Subgroup analysis: treatment settings  
**eTable 38.** Subgroup analysis: follow-up less than 6 months  
**eTable 39.** Subgroup analysis: follow-up longer than 6 months  
**eReferences.**

This supplementary material has been provided by the authors to give readers additional information about their work.

## eAppendix. Search strategy

### Ovid

Database(s): Embase 1988 to 2017 Week 05, Ovid MEDLINE(R) In-Process & Other Non-Indexed Citations and Ovid MEDLINE(R) 1946 to Present, PsycINFO 1806 to January Week 4 2017, EBM Reviews - Cochrane Central Register of Controlled Trials November 2016, EBM Reviews - Cochrane Database of Systematic Reviews 2005 to January 25, 2017

Search Strategy:

| #  | Searches                                                                                                                                                                                                                                                                                                                                                                                                                                                                                                                                                                                                                                                                                                                                                                                                                                                             | Results  |
|----|----------------------------------------------------------------------------------------------------------------------------------------------------------------------------------------------------------------------------------------------------------------------------------------------------------------------------------------------------------------------------------------------------------------------------------------------------------------------------------------------------------------------------------------------------------------------------------------------------------------------------------------------------------------------------------------------------------------------------------------------------------------------------------------------------------------------------------------------------------------------|----------|
| 1  | Anxiety Disorders/dh, dt, su, th                                                                                                                                                                                                                                                                                                                                                                                                                                                                                                                                                                                                                                                                                                                                                                                                                                     | 9492     |
| 2  | anxiety disorder/dm, dt, rt, su, th [Disease Management, Drug Therapy, Radiotherapy, Surgery, Therapy]                                                                                                                                                                                                                                                                                                                                                                                                                                                                                                                                                                                                                                                                                                                                                               | 13722    |
| 3  | exp Panic Disorder/dt, su, th [Drug Therapy, Surgery, Therapy]                                                                                                                                                                                                                                                                                                                                                                                                                                                                                                                                                                                                                                                                                                                                                                                                       | 7765     |
| 4  | exp panic/dm, dt, su, th [Disease Management, Drug Therapy, Surgery, Therapy]                                                                                                                                                                                                                                                                                                                                                                                                                                                                                                                                                                                                                                                                                                                                                                                        | 5422     |
| 5  | exp Phobic Disorders/dh, dt, su, th [Diet Therapy, Drug Therapy, Surgery, Therapy]                                                                                                                                                                                                                                                                                                                                                                                                                                                                                                                                                                                                                                                                                                                                                                                   | 3954     |
| 6  | exp phobia/dm, dt, su, th [Disease Management, Drug Therapy, Surgery, Therapy]                                                                                                                                                                                                                                                                                                                                                                                                                                                                                                                                                                                                                                                                                                                                                                                       | 5441     |
| 7  | exp Anxiety, Separation/dt, th [Drug Therapy, Therapy]                                                                                                                                                                                                                                                                                                                                                                                                                                                                                                                                                                                                                                                                                                                                                                                                               | 724      |
| 8  | exp separation anxiety/dm, dt, th [Disease Management, Drug Therapy, Therapy]                                                                                                                                                                                                                                                                                                                                                                                                                                                                                                                                                                                                                                                                                                                                                                                        | 425      |
| 9  | exp generalized anxiety disorder/dm, dt, su, th [Disease Management, Drug Therapy, Surgery, Therapy]                                                                                                                                                                                                                                                                                                                                                                                                                                                                                                                                                                                                                                                                                                                                                                 | 2415     |
| 10 | ((("social anxiet*" or "generalized anxiet*" or overanxious) adj3 (disorder* or neuroses or neurosis or neurotic or phobia* or phobic)) or ((anxiety or anxieties) adj3 (disorder* or neuroses or neurosis or neurotic)) or (panic adj3 (disorder* or attack*)) or Acrophobia* or agoraphobia* or claustrophobia* or homophobia* or neophobia* or Ophidiophobia* or phobia* or phobic or "separation anxiet*" or xenophobia*).mp.                                                                                                                                                                                                                                                                                                                                                                                                                                    | 244817   |
| 11 | exp Psychotherapy/                                                                                                                                                                                                                                                                                                                                                                                                                                                                                                                                                                                                                                                                                                                                                                                                                                                   | 569654   |
| 12 | exp Electroconvulsive Shock Therapy/                                                                                                                                                                                                                                                                                                                                                                                                                                                                                                                                                                                                                                                                                                                                                                                                                                 | 20518    |
| 13 | exp Electroconvulsive Therapy/                                                                                                                                                                                                                                                                                                                                                                                                                                                                                                                                                                                                                                                                                                                                                                                                                                       | 27336    |
| 14 | exp brain depth stimulation/                                                                                                                                                                                                                                                                                                                                                                                                                                                                                                                                                                                                                                                                                                                                                                                                                                         | 30937    |
| 15 | exp Deep Brain Stimulation/                                                                                                                                                                                                                                                                                                                                                                                                                                                                                                                                                                                                                                                                                                                                                                                                                                          | 39654    |
| 16 | exp transcranial magnetic stimulation/                                                                                                                                                                                                                                                                                                                                                                                                                                                                                                                                                                                                                                                                                                                                                                                                                               | 34619    |
| 17 | exp Vagus Nerve/                                                                                                                                                                                                                                                                                                                                                                                                                                                                                                                                                                                                                                                                                                                                                                                                                                                     | 40508    |
| 18 | exp Vagus Nerve Stimulation/                                                                                                                                                                                                                                                                                                                                                                                                                                                                                                                                                                                                                                                                                                                                                                                                                                         | 9498     |
| 19 | exp electrostimulation therapy/                                                                                                                                                                                                                                                                                                                                                                                                                                                                                                                                                                                                                                                                                                                                                                                                                                      | 181773   |
| 20 | exp Electric Stimulation Therapy/                                                                                                                                                                                                                                                                                                                                                                                                                                                                                                                                                                                                                                                                                                                                                                                                                                    | 254786   |
| 21 | exp electrical brain stimulation/                                                                                                                                                                                                                                                                                                                                                                                                                                                                                                                                                                                                                                                                                                                                                                                                                                    | 38192    |
| 22 | exp alternative medicine/                                                                                                                                                                                                                                                                                                                                                                                                                                                                                                                                                                                                                                                                                                                                                                                                                                            | 268544   |
| 23 | exp phototherapy/                                                                                                                                                                                                                                                                                                                                                                                                                                                                                                                                                                                                                                                                                                                                                                                                                                                    | 102362   |
| 24 | exp kinesiotherapy/                                                                                                                                                                                                                                                                                                                                                                                                                                                                                                                                                                                                                                                                                                                                                                                                                                                  | 58263    |
| 25 | exp Exercise Therapy/                                                                                                                                                                                                                                                                                                                                                                                                                                                                                                                                                                                                                                                                                                                                                                                                                                                | 105637   |
| 26 | exp Exercise/                                                                                                                                                                                                                                                                                                                                                                                                                                                                                                                                                                                                                                                                                                                                                                                                                                                        | 459889   |
| 27 | exp yoga/                                                                                                                                                                                                                                                                                                                                                                                                                                                                                                                                                                                                                                                                                                                                                                                                                                                            | 9351     |
| 28 | exp complementary therapies/                                                                                                                                                                                                                                                                                                                                                                                                                                                                                                                                                                                                                                                                                                                                                                                                                                         | 261302   |
| 29 | exp alternative medicine/                                                                                                                                                                                                                                                                                                                                                                                                                                                                                                                                                                                                                                                                                                                                                                                                                                            | 268544   |
| 30 | exp Combined Modality Therapy/                                                                                                                                                                                                                                                                                                                                                                                                                                                                                                                                                                                                                                                                                                                                                                                                                                       | 300497   |
| 31 | ((brain adj2 excitation) or (brain adj2 stimulat*) or "12 step program*" or abreaction or acupressure* or acupuncture or "age regression" or agent* or "alternative medicine" or aromatherap* or Aromatherapy or auriculotherap* or "Balint group*" or "behavior contracting" or "behavior modification" or bibliotherapy or biofeedback or "breathing exercise*" or catharsis or chemotherap* or Chronotherapy or "cognitive rehabilitation" or "cognitive restructuring" or "combined modalit*" or "complementary medicine*" or "consciousness raising" or "contingency management" or cotherap* or counseling or countercondition* or Countertransference or "crisis intervention*" or Desensitization or drug* or "electric stimulat*" or "electrical stimulat*" or Electroacupuncture or electrosleep or electrostimulat* or electrotherap* or "empty chair" or | 29404851 |

|    |                                                                                                                                                                                                                                                                                                                                                                                                                                                                                                                                                                                                                                                                                                                                                                                                                                                                                                                                                                                                                                                                                                                                                                                                                                                                                      |          |
|----|--------------------------------------------------------------------------------------------------------------------------------------------------------------------------------------------------------------------------------------------------------------------------------------------------------------------------------------------------------------------------------------------------------------------------------------------------------------------------------------------------------------------------------------------------------------------------------------------------------------------------------------------------------------------------------------------------------------------------------------------------------------------------------------------------------------------------------------------------------------------------------------------------------------------------------------------------------------------------------------------------------------------------------------------------------------------------------------------------------------------------------------------------------------------------------------------------------------------------------------------------------------------------------------|----------|
|    | exercise or fading or "fatty acid*" or "flower remed*" or "free association*" or gestalt or "group development" or "group dynamics" or "group intervention*" or heliotherap* or holistic or homeopathy or "human potential*" or humanis* or hypnosis or Hypnotherapy or imagery or intervention* or kinesiotherap* or kinesitherap* or Logotherapy or manag* or massage or medication* or "mental healing" or microbicid* or "mind-body" or neurofeedback or neurosurger* or operat* or overcorrection or "paradoxical technique*" or pharmacotherap* or phototherap* or phytotherap* or prevent* or Psychoanaly* or psychodrama or psychodrama* or psychotherap* or Psychotherapeutic* or radiotherap* or reflexotherap* or relaxation or resect* or "response cost" or "role play*" or "role playing" or "sensory feedback" or sociotherapy or spiritual* or "stress management" or suggestion* or "support group*" or surg* or "tai ji" or therap* or "therapeutic communit*" or "therapeutic touch*" or therapies or therapy or timeout* or training or "Transactional Analysis" or "transcranial magnetic stimulat*" or transference or treat* or treatment* or "twelve step program*" or "vagal nerve" or "vagal stimulat*" or "vagus nerve" or "vagus stimulat*" or yoga).mp. |          |
| 32 | or/11-31                                                                                                                                                                                                                                                                                                                                                                                                                                                                                                                                                                                                                                                                                                                                                                                                                                                                                                                                                                                                                                                                                                                                                                                                                                                                             | 29519244 |
| 33 | 10 and 32                                                                                                                                                                                                                                                                                                                                                                                                                                                                                                                                                                                                                                                                                                                                                                                                                                                                                                                                                                                                                                                                                                                                                                                                                                                                            | 168615   |
| 34 | or/1-9                                                                                                                                                                                                                                                                                                                                                                                                                                                                                                                                                                                                                                                                                                                                                                                                                                                                                                                                                                                                                                                                                                                                                                                                                                                                               | 37562    |
| 35 | 33 or 34                                                                                                                                                                                                                                                                                                                                                                                                                                                                                                                                                                                                                                                                                                                                                                                                                                                                                                                                                                                                                                                                                                                                                                                                                                                                             | 170412   |
| 36 | limit 35 to "all child (0 to 18 years)" [Limit not valid in Embase,PsycINFO,CCTR,CDSR; records were retained]                                                                                                                                                                                                                                                                                                                                                                                                                                                                                                                                                                                                                                                                                                                                                                                                                                                                                                                                                                                                                                                                                                                                                                        | 140150   |
| 37 | limit 36 to (childhood or adolescence <13 to 17 years>) [Limit not valid in Embase,Ovid MEDLINE(R),Ovid MEDLINE(R) In-Process,CCTR,CDSR; records were retained]                                                                                                                                                                                                                                                                                                                                                                                                                                                                                                                                                                                                                                                                                                                                                                                                                                                                                                                                                                                                                                                                                                                      | 104599   |
| 38 | limit 37 to (preschool child <1 to 6 years> or school child <7 to 12 years> or adolescent <13 to 17 years>) [Limit not valid in Ovid MEDLINE(R),Ovid MEDLINE(R) In-Process,PsycINFO,CCTR,CDSR; records were retained]                                                                                                                                                                                                                                                                                                                                                                                                                                                                                                                                                                                                                                                                                                                                                                                                                                                                                                                                                                                                                                                                | 34306    |
| 39 | (toddler* or child* or adolescent* or paediatric* or pediatric* or girl or girls or boy or boys or teen or teens or teenager* or preschooler* or "pre-schooler*" or preteen or preteens or "pre-teen" or "pre-teens" or youth or youths).mp.                                                                                                                                                                                                                                                                                                                                                                                                                                                                                                                                                                                                                                                                                                                                                                                                                                                                                                                                                                                                                                         | 6640078  |
| 40 | 35 and 39                                                                                                                                                                                                                                                                                                                                                                                                                                                                                                                                                                                                                                                                                                                                                                                                                                                                                                                                                                                                                                                                                                                                                                                                                                                                            | 41617    |
| 41 | from 38 keep 1-26193                                                                                                                                                                                                                                                                                                                                                                                                                                                                                                                                                                                                                                                                                                                                                                                                                                                                                                                                                                                                                                                                                                                                                                                                                                                                 | 26193    |
| 42 | 40 or 41                                                                                                                                                                                                                                                                                                                                                                                                                                                                                                                                                                                                                                                                                                                                                                                                                                                                                                                                                                                                                                                                                                                                                                                                                                                                             | 42800    |
| 43 | exp meta analysis/                                                                                                                                                                                                                                                                                                                                                                                                                                                                                                                                                                                                                                                                                                                                                                                                                                                                                                                                                                                                                                                                                                                                                                                                                                                                   | 234764   |
| 44 | exp Meta-Analysis as Topic/                                                                                                                                                                                                                                                                                                                                                                                                                                                                                                                                                                                                                                                                                                                                                                                                                                                                                                                                                                                                                                                                                                                                                                                                                                                          | 53463    |
| 45 | exp "systematic review"/                                                                                                                                                                                                                                                                                                                                                                                                                                                                                                                                                                                                                                                                                                                                                                                                                                                                                                                                                                                                                                                                                                                                                                                                                                                             | 153050   |
| 46 | ((meta adj analys*) or (systematic* adj3 review*)).mp.pt.                                                                                                                                                                                                                                                                                                                                                                                                                                                                                                                                                                                                                                                                                                                                                                                                                                                                                                                                                                                                                                                                                                                                                                                                                            | 550689   |
| 47 | 43 or 44 or 45 or 46                                                                                                                                                                                                                                                                                                                                                                                                                                                                                                                                                                                                                                                                                                                                                                                                                                                                                                                                                                                                                                                                                                                                                                                                                                                                 | 550689   |
| 48 | exp controlled study/                                                                                                                                                                                                                                                                                                                                                                                                                                                                                                                                                                                                                                                                                                                                                                                                                                                                                                                                                                                                                                                                                                                                                                                                                                                                | 5658493  |
| 49 | exp Randomized Controlled Trial/                                                                                                                                                                                                                                                                                                                                                                                                                                                                                                                                                                                                                                                                                                                                                                                                                                                                                                                                                                                                                                                                                                                                                                                                                                                     | 905465   |
| 50 | exp triple blind procedure/                                                                                                                                                                                                                                                                                                                                                                                                                                                                                                                                                                                                                                                                                                                                                                                                                                                                                                                                                                                                                                                                                                                                                                                                                                                          | 204      |
| 51 | exp Double-Blind Method/                                                                                                                                                                                                                                                                                                                                                                                                                                                                                                                                                                                                                                                                                                                                                                                                                                                                                                                                                                                                                                                                                                                                                                                                                                                             | 390501   |
| 52 | exp Single-Blind Method/                                                                                                                                                                                                                                                                                                                                                                                                                                                                                                                                                                                                                                                                                                                                                                                                                                                                                                                                                                                                                                                                                                                                                                                                                                                             | 68129    |
| 53 | exp latin square design/                                                                                                                                                                                                                                                                                                                                                                                                                                                                                                                                                                                                                                                                                                                                                                                                                                                                                                                                                                                                                                                                                                                                                                                                                                                             | 570      |
| 54 | ((control* adj3 study) or (control* adj3 trial) or (randomized adj3 study) or (randomized adj3 trial) or (randomised adj3 study) or (randomised adj3 trial) or "pragmatic clinical trial" or (doubl* adj blind*) or (doubl* adj mask*) or (singl* adj blind*) or (singl* adj mask*) or (tripl* adj blind*) or (tripl* adj mask*) or (trebl* adj blind*) or (trebl* adj mask*) or "latin square").mp.pt.                                                                                                                                                                                                                                                                                                                                                                                                                                                                                                                                                                                                                                                                                                                                                                                                                                                                              | 7148487  |
| 55 | or/48-54                                                                                                                                                                                                                                                                                                                                                                                                                                                                                                                                                                                                                                                                                                                                                                                                                                                                                                                                                                                                                                                                                                                                                                                                                                                                             | 7148556  |
| 56 | controlled study/                                                                                                                                                                                                                                                                                                                                                                                                                                                                                                                                                                                                                                                                                                                                                                                                                                                                                                                                                                                                                                                                                                                                                                                                                                                                    | 5390344  |
| 57 | exp comparative study/                                                                                                                                                                                                                                                                                                                                                                                                                                                                                                                                                                                                                                                                                                                                                                                                                                                                                                                                                                                                                                                                                                                                                                                                                                                               | 2718783  |
| 58 | exp Cross-Sectional Studies/                                                                                                                                                                                                                                                                                                                                                                                                                                                                                                                                                                                                                                                                                                                                                                                                                                                                                                                                                                                                                                                                                                                                                                                                                                                         | 447921   |
| 59 | exp Cohort Studies/                                                                                                                                                                                                                                                                                                                                                                                                                                                                                                                                                                                                                                                                                                                                                                                                                                                                                                                                                                                                                                                                                                                                                                                                                                                                  | 2043883  |
| 60 | exp longitudinal study/                                                                                                                                                                                                                                                                                                                                                                                                                                                                                                                                                                                                                                                                                                                                                                                                                                                                                                                                                                                                                                                                                                                                                                                                                                                              | 327400   |
| 61 | exp retrospective study/                                                                                                                                                                                                                                                                                                                                                                                                                                                                                                                                                                                                                                                                                                                                                                                                                                                                                                                                                                                                                                                                                                                                                                                                                                                             | 1141189  |
| 62 | exp prospective study/                                                                                                                                                                                                                                                                                                                                                                                                                                                                                                                                                                                                                                                                                                                                                                                                                                                                                                                                                                                                                                                                                                                                                                                                                                                               | 905077   |

|    |                                                                                                                                                                                                                                                                                                                                                                                                                                                                                                                                                                                                                                                                                                                                                                                                                                                                                                                                                                                                                                                                                                                                                                                                                                                                                                                                                                                                                                                                                                                                                                                                                                                                                                                                                                                                                                                                                                                                                                                                                                                                                                                         |          |
|----|-------------------------------------------------------------------------------------------------------------------------------------------------------------------------------------------------------------------------------------------------------------------------------------------------------------------------------------------------------------------------------------------------------------------------------------------------------------------------------------------------------------------------------------------------------------------------------------------------------------------------------------------------------------------------------------------------------------------------------------------------------------------------------------------------------------------------------------------------------------------------------------------------------------------------------------------------------------------------------------------------------------------------------------------------------------------------------------------------------------------------------------------------------------------------------------------------------------------------------------------------------------------------------------------------------------------------------------------------------------------------------------------------------------------------------------------------------------------------------------------------------------------------------------------------------------------------------------------------------------------------------------------------------------------------------------------------------------------------------------------------------------------------------------------------------------------------------------------------------------------------------------------------------------------------------------------------------------------------------------------------------------------------------------------------------------------------------------------------------------------------|----------|
| 63 | exp population research/                                                                                                                                                                                                                                                                                                                                                                                                                                                                                                                                                                                                                                                                                                                                                                                                                                                                                                                                                                                                                                                                                                                                                                                                                                                                                                                                                                                                                                                                                                                                                                                                                                                                                                                                                                                                                                                                                                                                                                                                                                                                                                | 90005    |
| 64 | exp observational study/                                                                                                                                                                                                                                                                                                                                                                                                                                                                                                                                                                                                                                                                                                                                                                                                                                                                                                                                                                                                                                                                                                                                                                                                                                                                                                                                                                                                                                                                                                                                                                                                                                                                                                                                                                                                                                                                                                                                                                                                                                                                                                | 158991   |
| 65 | clinical study/                                                                                                                                                                                                                                                                                                                                                                                                                                                                                                                                                                                                                                                                                                                                                                                                                                                                                                                                                                                                                                                                                                                                                                                                                                                                                                                                                                                                                                                                                                                                                                                                                                                                                                                                                                                                                                                                                                                                                                                                                                                                                                         | 223234   |
| 66 | exp Evaluation Studies/                                                                                                                                                                                                                                                                                                                                                                                                                                                                                                                                                                                                                                                                                                                                                                                                                                                                                                                                                                                                                                                                                                                                                                                                                                                                                                                                                                                                                                                                                                                                                                                                                                                                                                                                                                                                                                                                                                                                                                                                                                                                                                 | 259715   |
| 67 | exp quantitative study/                                                                                                                                                                                                                                                                                                                                                                                                                                                                                                                                                                                                                                                                                                                                                                                                                                                                                                                                                                                                                                                                                                                                                                                                                                                                                                                                                                                                                                                                                                                                                                                                                                                                                                                                                                                                                                                                                                                                                                                                                                                                                                 | 59289    |
| 68 | exp validation studies/                                                                                                                                                                                                                                                                                                                                                                                                                                                                                                                                                                                                                                                                                                                                                                                                                                                                                                                                                                                                                                                                                                                                                                                                                                                                                                                                                                                                                                                                                                                                                                                                                                                                                                                                                                                                                                                                                                                                                                                                                                                                                                 | 146273   |
| 69 | exp quasi experimental study/                                                                                                                                                                                                                                                                                                                                                                                                                                                                                                                                                                                                                                                                                                                                                                                                                                                                                                                                                                                                                                                                                                                                                                                                                                                                                                                                                                                                                                                                                                                                                                                                                                                                                                                                                                                                                                                                                                                                                                                                                                                                                           | 4492     |
| 70 | exp field study/                                                                                                                                                                                                                                                                                                                                                                                                                                                                                                                                                                                                                                                                                                                                                                                                                                                                                                                                                                                                                                                                                                                                                                                                                                                                                                                                                                                                                                                                                                                                                                                                                                                                                                                                                                                                                                                                                                                                                                                                                                                                                                        | 10921    |
| 71 | in vivo study/                                                                                                                                                                                                                                                                                                                                                                                                                                                                                                                                                                                                                                                                                                                                                                                                                                                                                                                                                                                                                                                                                                                                                                                                                                                                                                                                                                                                                                                                                                                                                                                                                                                                                                                                                                                                                                                                                                                                                                                                                                                                                                          | 265314   |
| 72 | exp panel study/                                                                                                                                                                                                                                                                                                                                                                                                                                                                                                                                                                                                                                                                                                                                                                                                                                                                                                                                                                                                                                                                                                                                                                                                                                                                                                                                                                                                                                                                                                                                                                                                                                                                                                                                                                                                                                                                                                                                                                                                                                                                                                        | 1232     |
| 73 | exp prevention study/                                                                                                                                                                                                                                                                                                                                                                                                                                                                                                                                                                                                                                                                                                                                                                                                                                                                                                                                                                                                                                                                                                                                                                                                                                                                                                                                                                                                                                                                                                                                                                                                                                                                                                                                                                                                                                                                                                                                                                                                                                                                                                   | 6709     |
| 74 | exp replication study/                                                                                                                                                                                                                                                                                                                                                                                                                                                                                                                                                                                                                                                                                                                                                                                                                                                                                                                                                                                                                                                                                                                                                                                                                                                                                                                                                                                                                                                                                                                                                                                                                                                                                                                                                                                                                                                                                                                                                                                                                                                                                                  | 2630     |
| 75 | exp Feasibility Studies/                                                                                                                                                                                                                                                                                                                                                                                                                                                                                                                                                                                                                                                                                                                                                                                                                                                                                                                                                                                                                                                                                                                                                                                                                                                                                                                                                                                                                                                                                                                                                                                                                                                                                                                                                                                                                                                                                                                                                                                                                                                                                                | 137033   |
| 76 | exp trend study/                                                                                                                                                                                                                                                                                                                                                                                                                                                                                                                                                                                                                                                                                                                                                                                                                                                                                                                                                                                                                                                                                                                                                                                                                                                                                                                                                                                                                                                                                                                                                                                                                                                                                                                                                                                                                                                                                                                                                                                                                                                                                                        | 19095    |
| 77 | exp correlational study/                                                                                                                                                                                                                                                                                                                                                                                                                                                                                                                                                                                                                                                                                                                                                                                                                                                                                                                                                                                                                                                                                                                                                                                                                                                                                                                                                                                                                                                                                                                                                                                                                                                                                                                                                                                                                                                                                                                                                                                                                                                                                                | 24732    |
| 78 | exp case-control studies/                                                                                                                                                                                                                                                                                                                                                                                                                                                                                                                                                                                                                                                                                                                                                                                                                                                                                                                                                                                                                                                                                                                                                                                                                                                                                                                                                                                                                                                                                                                                                                                                                                                                                                                                                                                                                                                                                                                                                                                                                                                                                               | 978796   |
| 79 | exp confidence interval/                                                                                                                                                                                                                                                                                                                                                                                                                                                                                                                                                                                                                                                                                                                                                                                                                                                                                                                                                                                                                                                                                                                                                                                                                                                                                                                                                                                                                                                                                                                                                                                                                                                                                                                                                                                                                                                                                                                                                                                                                                                                                                | 320632   |
| 80 | exp regression analysis/                                                                                                                                                                                                                                                                                                                                                                                                                                                                                                                                                                                                                                                                                                                                                                                                                                                                                                                                                                                                                                                                                                                                                                                                                                                                                                                                                                                                                                                                                                                                                                                                                                                                                                                                                                                                                                                                                                                                                                                                                                                                                                | 902411   |
| 81 | exp proportional hazards model/                                                                                                                                                                                                                                                                                                                                                                                                                                                                                                                                                                                                                                                                                                                                                                                                                                                                                                                                                                                                                                                                                                                                                                                                                                                                                                                                                                                                                                                                                                                                                                                                                                                                                                                                                                                                                                                                                                                                                                                                                                                                                         | 170815   |
| 82 | ((control* adj3 study) or "comparative study" or "comparative survey" or "comparative analysis" or "cross-sectional study" or "cross-sectional analysis" or "cross-sectional survey" or "cross-sectional design" or "prevalence study" or "prevalence analysis" or "prevalence survey" or "disease frequency study" or "disease frequency analysis" or "disease frequency survey" or cohort* or longitudinal* or retrospectiv* or prospectiv* or (population adj3 (stud* or survey* or analys* or research)) or ("follow-up" or followup) adj (stud* or survey or analysis)) or ((observation or observational) adj (study or survey or analysis)) or "clinical study" or "evaluation study" or "evaluation survey" or "evaluation analysis" or "quantitative study" or "quantitative analys*" or "numerical study" or "validation study" or "validation survey" or "validation analysis" or "quasi experimental study" or "quasi experimental analysis" or "quasiexperimental study" or "quasiexperimental analysis" or "field study" or "field survey" or "field analysis" or "in vivo study" or "in vivo analysis" or "panel study" or "panel survey" or "panel analysis" or ((prevention or preventive) adj3 (trial or study or analysis or survey)) or "replication study" or "replication analysis " or "replication trial" or "feasibility study" or "feasibility analysis" or "trend study" or "trend survey" or "trend analysis" or ((correlation* adj2 study) or (correlation* adj2 analys*)) or "case control study" or "case base study" or "case referent study" or "case referent study" or "case referent study" or "case compeer study" or "case comparison study" or "matched case control" or "confidence interval" or "regression analysis" or "least square" or "least squares" or (hazard* adj (model or analys* or regression or ratio or ratios)) or "Cox model" or "Cox multivariate analyses" or "Cox multivariate analysis" or "Cox regression" or "Cox survival analyses" or "Cox survival analysis" or "Cox survival model" or ((study or trial or random* or control*) and compar*).mp.pt. | 17278574 |
| 83 | or/56-82                                                                                                                                                                                                                                                                                                                                                                                                                                                                                                                                                                                                                                                                                                                                                                                                                                                                                                                                                                                                                                                                                                                                                                                                                                                                                                                                                                                                                                                                                                                                                                                                                                                                                                                                                                                                                                                                                                                                                                                                                                                                                                                | 17643418 |
| 84 | 47 or 55 or 83                                                                                                                                                                                                                                                                                                                                                                                                                                                                                                                                                                                                                                                                                                                                                                                                                                                                                                                                                                                                                                                                                                                                                                                                                                                                                                                                                                                                                                                                                                                                                                                                                                                                                                                                                                                                                                                                                                                                                                                                                                                                                                          | 18237284 |
| 85 | 42 and 84                                                                                                                                                                                                                                                                                                                                                                                                                                                                                                                                                                                                                                                                                                                                                                                                                                                                                                                                                                                                                                                                                                                                                                                                                                                                                                                                                                                                                                                                                                                                                                                                                                                                                                                                                                                                                                                                                                                                                                                                                                                                                                               | 22522    |
| 86 | from 42 keep 16973-28898                                                                                                                                                                                                                                                                                                                                                                                                                                                                                                                                                                                                                                                                                                                                                                                                                                                                                                                                                                                                                                                                                                                                                                                                                                                                                                                                                                                                                                                                                                                                                                                                                                                                                                                                                                                                                                                                                                                                                                                                                                                                                                | 11926    |
| 87 | limit 86 to (clinical study or clinical trial, all or clinical trial, phase i or clinical trial, phase ii or clinical trial, phase iii or clinical trial, phase iv or clinical trial or controlled clinical trial or multicenter study or observational study or randomized controlled trial or pragmatic clinical trial or comparative study or controlled clinical trial or evaluation studies or meta analysis or multicenter study or observational study or randomized controlled trial or pragmatic clinical trial or systematic reviews or validation studies) [Limit not valid in Embase,PsycINFO,CCTR,CDSR; records were retained]                                                                                                                                                                                                                                                                                                                                                                                                                                                                                                                                                                                                                                                                                                                                                                                                                                                                                                                                                                                                                                                                                                                                                                                                                                                                                                                                                                                                                                                                             | 3206     |
| 88 | 85 or 87                                                                                                                                                                                                                                                                                                                                                                                                                                                                                                                                                                                                                                                                                                                                                                                                                                                                                                                                                                                                                                                                                                                                                                                                                                                                                                                                                                                                                                                                                                                                                                                                                                                                                                                                                                                                                                                                                                                                                                                                                                                                                                                | 22732    |
| 89 | limit 88 to (editorial or erratum or letter or note or addresses or autobiography or bibliography or biography or blogs or comment or dictionary or directory or interactive tutorial or interview or                                                                                                                                                                                                                                                                                                                                                                                                                                                                                                                                                                                                                                                                                                                                                                                                                                                                                                                                                                                                                                                                                                                                                                                                                                                                                                                                                                                                                                                                                                                                                                                                                                                                                                                                                                                                                                                                                                                   | 548      |

|     |                                                                                                                                                                                                                                                                                                                      |       |
|-----|----------------------------------------------------------------------------------------------------------------------------------------------------------------------------------------------------------------------------------------------------------------------------------------------------------------------|-------|
|     | lectures or legal cases or legislation or news or newspaper article or overall or patient education handout or periodical index or portraits or published erratum or video-audio media or webcasts) [Limit not valid in Embase,Ovid MEDLINE(R),Ovid MEDLINE(R) In-Process,PsycINFO,CCTR,CDSR; records were retained] |       |
| 90  | from 89 keep 1-234                                                                                                                                                                                                                                                                                                   | 234   |
| 91  | 88 not 90                                                                                                                                                                                                                                                                                                            | 22498 |
| 92  | limit 91 to yr="2015 -Current"                                                                                                                                                                                                                                                                                       | 4188  |
| 93  | remove duplicates from 92                                                                                                                                                                                                                                                                                            | 2858  |
| 94  | limit 91 to yr="2012-2014"                                                                                                                                                                                                                                                                                           | 5471  |
| 95  | remove duplicates from 94                                                                                                                                                                                                                                                                                            | 3662  |
| 96  | limit 91 to yr="2008-2011"                                                                                                                                                                                                                                                                                           | 4733  |
| 97  | remove duplicates from 96                                                                                                                                                                                                                                                                                            | 3267  |
| 98  | limit 91 to yr="2001 -2007"                                                                                                                                                                                                                                                                                          | 4836  |
| 99  | remove duplicates from 98                                                                                                                                                                                                                                                                                            | 3351  |
| 100 | limit 91 to yr="1806 -2000"                                                                                                                                                                                                                                                                                          | 3250  |
| 101 | remove duplicates from 100                                                                                                                                                                                                                                                                                           | 2276  |
| 102 | 93 or 95 or 97 or 99 or 101                                                                                                                                                                                                                                                                                          | 15414 |

## Scopus

TITLE-ABS-KEY(("social anxiet\*" or "generalized anxiet\*" or overanxious) W/3 (disorder\* or neuroses or neurosis or neurotic or phobia\* or phobic)) OR ((anxiety or anxieties) W/3 (disorder\* or neuroses or neurosis or neurotic)) OR (panic W/3 (disorder\* or attack\*)) OR Acrophobia\* OR agoraphobia\* OR claustrophobia\* OR homophobia\* OR neophobia\* OR Ophidiophobia\* OR phobia\* OR phobic OR "separation anxiet\*" OR xenophobia\*)

TITLE-ABS-KEY((brain W/2 excitation) or (brain W/2 stimulat\*) or "12 step program\*" or abreaction or acupressure\* or acupuncture or "age regression" or agent\* or "alternative medicine" or aromatherap\* or Aromatherapy or auriculotherap\* or "Balint group\*" or "behavior contracting" or "behavior modification" or bibliotherapy or biofeedback or "breathing exercise\*" or catharsis or chemotherap\* or Chronotherapy or "cognitive rehabilitation" or "cognitive restructuring" or "combined modalit\*" or "complementary medicine\*" or "consciousness raising" or "contingency management" or cotherap\* or counseling or countercondition\* or Countertransference or "crisis intervention\*" or Desensitization or drug\* or "electric stimulat\*" or "electrical stimulat\*" or Electroacupuncture or electrosleep or electrostimulat\* or electrotherap\* or "empty chair" or exercise or fading or "fatty acid\*" or "flower remed\*" or "free association\*" or gestalt or "group development" or "group dynamics" or "group intervention\*" or heliotherap\* or holistic or homeopathy or "human potential\*" or humanis\* or hypnosis or Hypnotherapy or imagery or intervention\* or kinesiotherap\* or kinesitherap\* or Logotherapy or manag\* or massage or medication\* or "mental healing" or microbicid\* or "mind-body" or neurofeedback or neurosurger\* or operat\* or overcorrection or "paradoxical technique\*" or pharmacotherap\* or phototherap\* or phytotherap\* or prevent\* or Psychoanaly\* or psychodrama or psychodrama\* or psychotherap\* or Psychotherapeutic\* or radiotherap\* or reflexotherap\* or relaxation or resect\* or "response cost" or "role play\*" or "role playing" or "sensory feedback" or sociotherapy or spiritual\* or "stress management" or suggestion\* or "support group\*" or surg\* or "tai ji" or therap\* or "therapeutic communit\*" or "therapeutic touch\*" or therapies or therapy or timeout\* or training or "Transactional Analysis" or "transcranial magnetic stimulat\*" or transference or treat\* or treatment\* or "twelve step program\*" or "vagal nerve" or "vagal stimulat\*" or "vagus nerve" or "vagus stimulat\*" or yoga)

TITLE-ABS-KEY(newborn\* or neonat\* or infant\* or toddler\* or child\* or adolescent\* or paediatric\* or pediatric\* or girl or girls or boy or boys or teen or teens or teenager\* or preschooler\* or "pre-schooler\*" or preteen or preteens or "pre-teen" or "pre-teens" or youth or youths)

TITLE-ABS-KEY((meta W/1 analys\*) OR (systematic\* W/3 review\*) OR guideline\* OR (control\* W/3 study) OR (control\* W/3 trial) OR (randomized W/3 study) OR (randomized W/3 trial) OR (randomised W/3 study) OR (randomised W/3 trial) OR "pragmatic clinical trial" OR (doubl\* W/1 blind\*) OR (doubl\* W/1 mask\*) OR (singl\* W/1 blind\*) OR (singl\* W/1 mask\*) OR (tripl\* W/1 blind\*) OR (tripl\* W/1 mask\*) OR (trebl\* W/1 blind\*) OR (trebl\* W/1 mask\*) OR "latin square" OR placebo\* OR nocebo\*)

TITLE-ABS-KEY((control\* W/3 study) OR "comparative study" OR "comparative survey" OR "comparative analysis" OR "cross-sectional study" OR "cross-sectional analysis" OR "cross-sectional survey" OR "cross-sectional design" OR "prevalence study" OR "prevalence analysis" OR "prevalence survey" OR "disease frequency study" OR "disease frequency analysis" OR "disease frequency survey" OR cohort\* OR longitudinal\* OR retrospectiv\* OR prospectiv\* OR (population W/3 (stud\* or survey\* or analys\* or research)) OR (("follow-up" or followup) W/1 (stud\* or survey or analysis)) OR ((observation or observational) W/1 (study or survey or analysis)) OR "clinical study" OR "evaluation study" OR "evaluation survey" OR "evaluation analysis" OR "quantitative study" OR "quantitative analys\*" OR "numerical study" OR "validation study" OR "validation survey" OR "validation analysis" OR "quasi experimental study" OR "quasi experimental analysis" OR "quasiexperimental study" OR "quasiexperimental analysis" OR "field study" OR "field survey" OR "field analysis" OR "in vivo study" OR "in vivo analysis" OR "panel study" OR "panel survey" OR "panel analysis" OR ((prevention or preventive) W/3 (trial or study or analysis or survey)) OR "replication study" OR "replication analysis" OR "replication trial" OR "feasibility study" OR "feasibility analysis" OR "trend study" OR "trend survey" OR "trend analysis" OR ((correlation\* W/2 study) OR (correlation\* W/2 analys\*)) OR "case control study" OR "case base study" OR "case referent study" OR "case referent study" OR "case referent study" OR "case compeer study" OR "case comparison study" OR "matched case control" OR "confidence interval" OR "regression analysis" OR "least square" OR "least

squares" OR (hazard\* W/1 (model OR analys\* OR regression or ratio or ratios)) OR "Cox model" OR "Cox multivariate analyses" OR "Cox multivariate analysis" OR "Cox regression" OR "Cox survival analyses" OR "Cox survival analysis" OR "Cox survival model" OR ((study OR trial OR random\* OR control\*) AND compar\*)

1 and 2 and 3 and (4 or 5)

DOCTYPE(le) OR DOCTYPE(ed) OR DOCTYPE(bk) OR DOCTYPE(er) OR DOCTYPE(no) OR DOCTYPE(sh)  
6 and not 7

PMID(0\*) OR PMID(1\*) OR PMID(2\*) OR PMID(3\*) OR PMID(4\*) OR PMID(5\*) OR PMID(6\*) OR PMID(7\*)  
OR PMID(8\*) OR PMID(9\*)

8 and not 9



**ClinicalTrials.Gov**

Open Studies | anxiety OR overanxious OR phobia OR acrophobia OR agoraphobia OR claustrophobia OR  
homophobia OR neophobia OR ophidiophobia OR xenophobia | Child  
Active, not recruiting | anxiety OR overanxious OR phobia OR acrophobia OR agoraphobia OR claustrophobia OR  
homophobia OR neophobia OR ophidiophobia OR xenophobia | Child  
Enrolling by invitation | anxiety OR overanxious OR phobia OR acrophobia OR agoraphobia OR claustrophobia  
OR homophobia OR neophobia OR ophidiophobia OR xenophobia | Child

**Health Canada**

Any of these words: anxiety overanxious phobia acrophobia agoraphobia claustrophobia homophobia  
neophobia ophidiophobia xenophobia

All of these words: child

Any of these words: anxiety overanxious phobia acrophobia agoraphobia claustrophobia homophobia  
neophobia ophidiophobia xenophobia

All of these words: children

Any of these words: anxiety overanxious phobia acrophobia agoraphobia claustrophobia homophobia  
neophobia ophidiophobia xenophobia

All of these words: adolescent

Any of these words: anxiety overanxious phobia acrophobia agoraphobia claustrophobia homophobia  
neophobia ophidiophobia xenophobia

All of these words: teen

**Medicines and Healthcare Products Regulatory Agency**

Any of these words: anxiety overanxious phobia acrophobia agoraphobia claustrophobia homophobia  
neophobia ophidiophobia xenophobia

**AHRQ's Horizon Scanning System**

Anxiety OR overanxious OR phobia OR acrophobia OR agoraphobia OR claustrophobia OR homophobia OR neophobia OR ophidiophobia OR xenophobia

**eFigure 1.** Flow chart

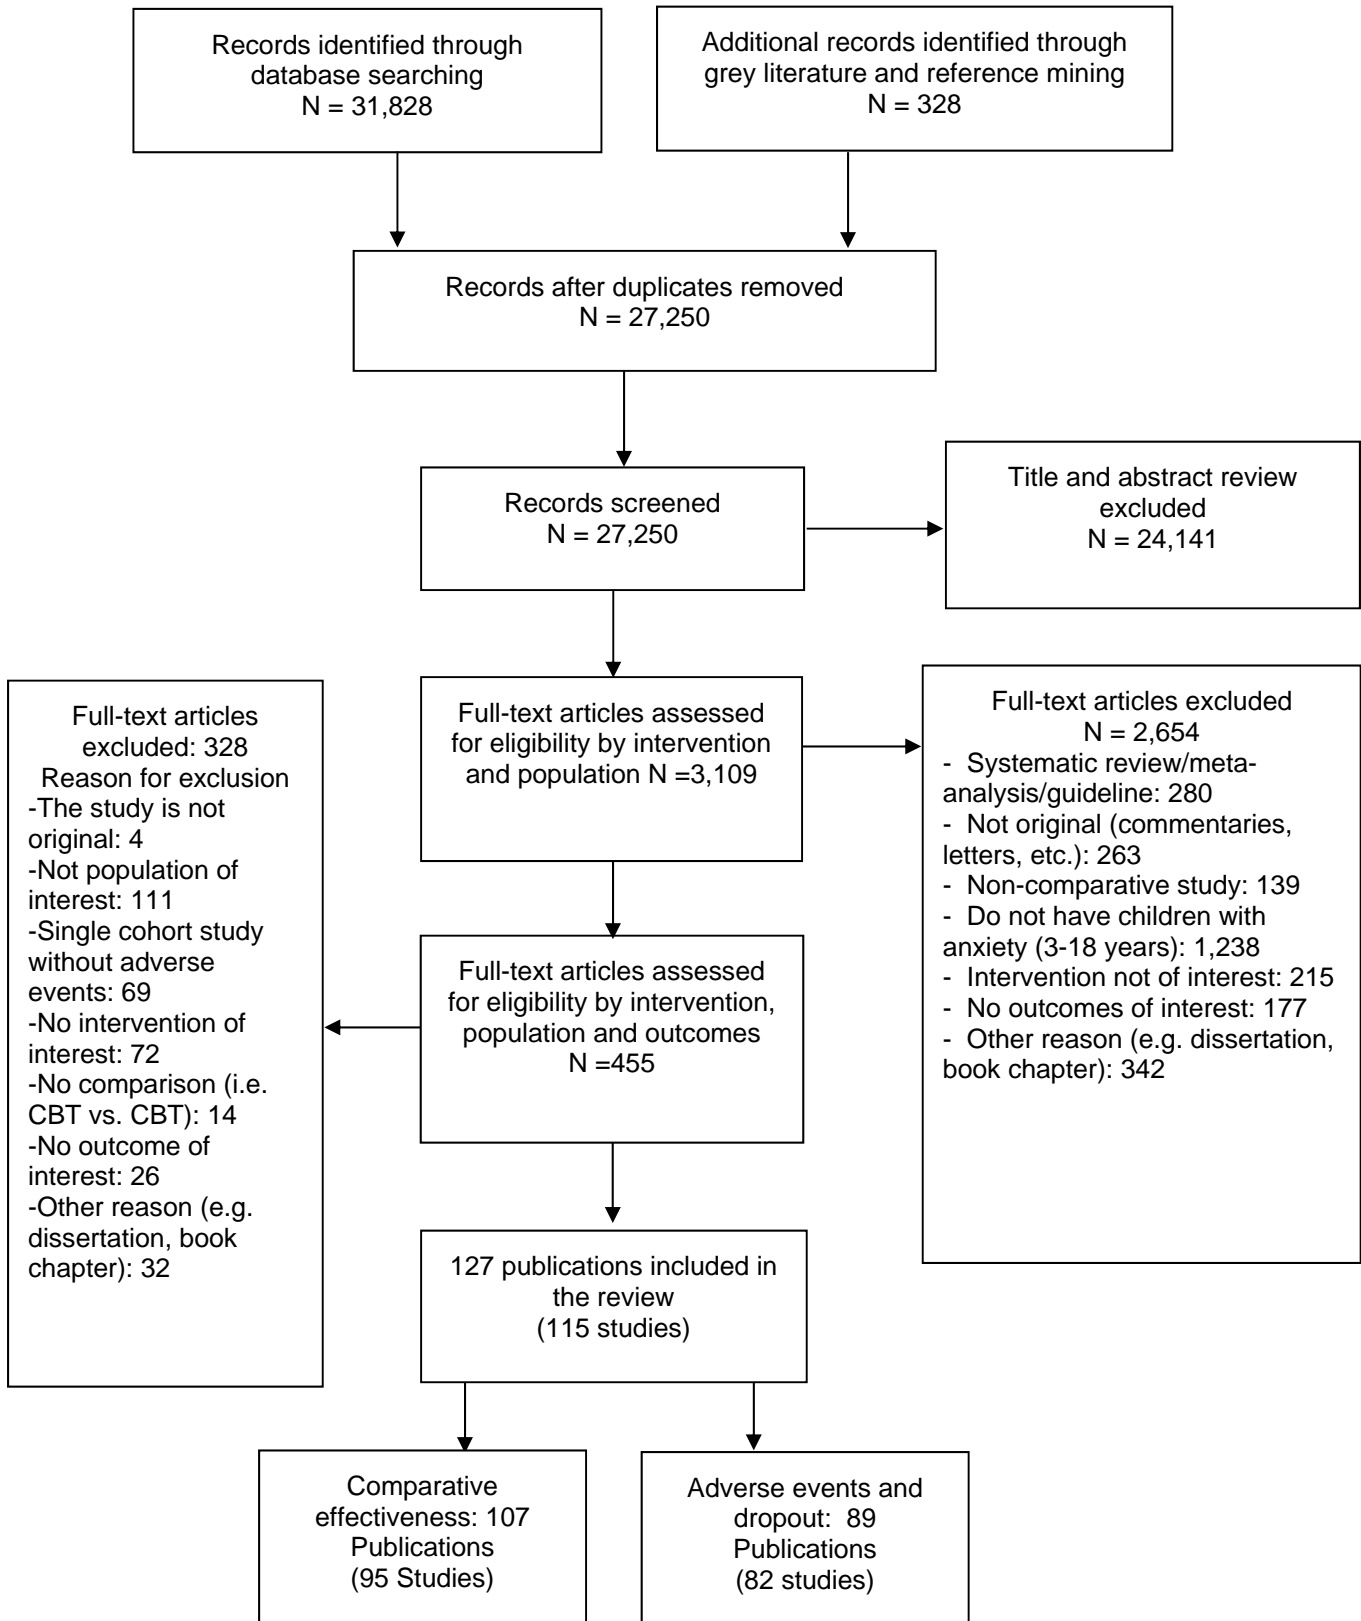

**eFigure 2.** Risk of bias assessment for randomized control trials

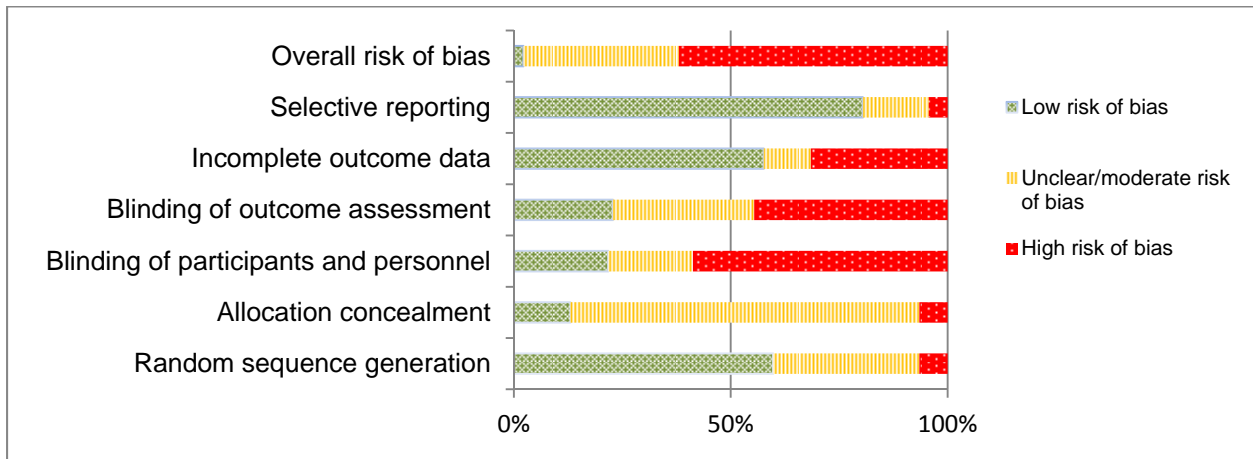

**eFigure 3.** Risk of bias assessment for nonrandomized comparative studies

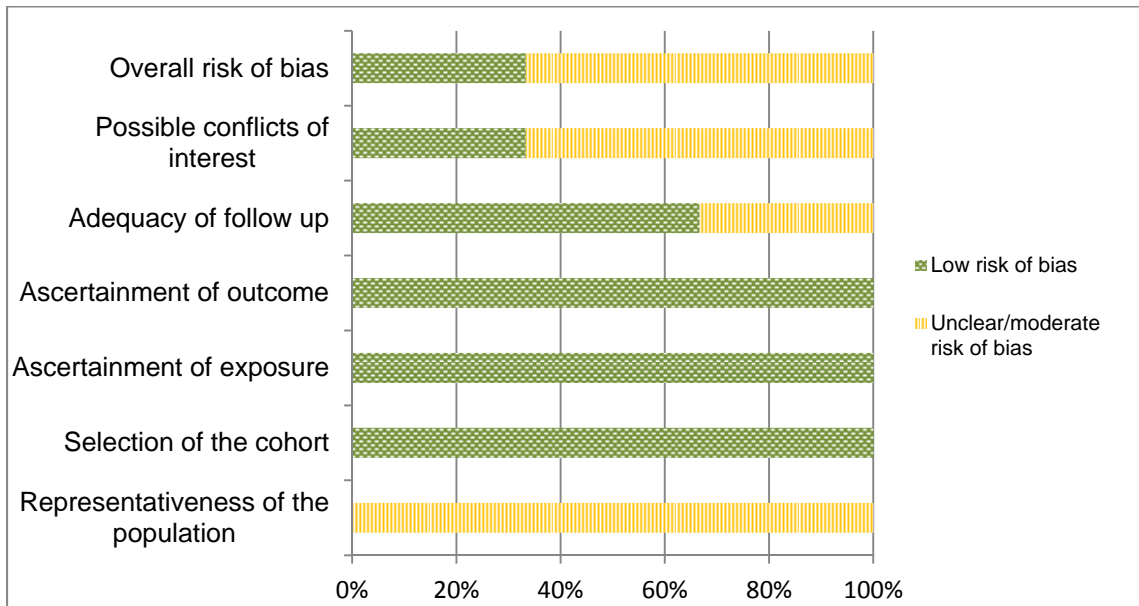

**eTable 1.** Characteristics of the included studies comparing medications vs pill placebo

| Author, Year                | Study country, study design, type of study, study settings | Type of anxiety/Severity (CGI) | Intervention and comparisons (n of patients) | Characteristics of interventions (psychotherapy: components, delivery model)/pharm: drug intensity, duration (weeks)) | Patient characteristics mean age (range) , male (%), race/ethnicity, comorbidity, household income, parent education, family dysfunction/stressor, treatment sequence, insurance, history of maltreatment) | Follow up after the end of intervention (weeks ) |
|-----------------------------|------------------------------------------------------------|--------------------------------|----------------------------------------------|-----------------------------------------------------------------------------------------------------------------------|------------------------------------------------------------------------------------------------------------------------------------------------------------------------------------------------------------|--------------------------------------------------|
| Abikoff, 2005 <sup>1</sup>  | United States RCT Mental Health Clinic                     | Anxiety disorder               | SSRI: Fluvoxamine (N=15)                     | Maximum of 300 mg in adolescents and 250 mg in children younger than 13 years of age.                                 | Mean age: 10 (Range 6 – 17)                                                                                                                                                                                | NR                                               |
|                             |                                                            |                                | Control (N=10)                               | Pill Placebo                                                                                                          |                                                                                                                                                                                                            |                                                  |
| Black, 1994 <sup>2</sup>    | United States RCT Mental Health Clinic                     | GAD, SAD, SoP CGI $\geq$ 6: NR | SSRI: Fluoxetine (N=6)                       | 0.2 mg/kg for 1 week, then 0.4 mg/kg for 1 week, then 0.6 mg/kg for 10 weeks.                                         | Mean age: 9.1<br>Male: 50%                                                                                                                                                                                 | 0                                                |
|                             |                                                            |                                | Control: (N=9)                               | Placebo syrup, 0.08 mL/kg/day for 2 weeks                                                                             | Mean age: 8.1<br>Male: 33.3%                                                                                                                                                                               |                                                  |
| Birmaher, 2003 <sup>3</sup> | United States RCT Mental Health Clinic                     | GAD, SAD, SoP, SP              | SSRI: Fluoxetine (N=37)                      | Up to 200 mg per day for 12 weeks                                                                                     | Mean age: 11.6<br>Male : 46%<br>Caucasian: 97.2%, Asian: 2.8%<br>Low income: 27.6%<br>ADHD: 5%, Depression: 5%, dysthymia: 8%, enuresis: 5%                                                                | 52                                               |
|                             |                                                            |                                | Control (N=37)                               | Pill Placebo                                                                                                          | Mean age: 11.9<br>Male: 46%<br>Caucasian: 95%, Asian: 5%<br>ODD: 8%, enuresis:8, tics: 5%                                                                                                                  |                                                  |
| da Costa, 2013 <sup>4</sup> | Brazil RCT                                                 | Mean CGI= 4.9                  | TCA: Clomipramine                            | Clomipramine 118.75 mg/ day average dose, 12                                                                          | Mean age: 11.2 (range: 7-17)<br>Males: 33%                                                                                                                                                                 | 0                                                |



| Author, Year                       | Study country, study design, type of study, study settings | Type of anxiety/Severity (CGI) | Intervention and comparisons (n of patients)                | Characteristics of interventions (psychotherapy: components, delivery model)/pharm: drug intensity, duration (weeks))      | Patient characteristics mean age (range) , male (%), race/ethnicity, comorbidity, household income, parent education, family dysfunction/stressor, treatment sequence, insurance, history of maltreatment) | Follow up after the end of intervention (weeks ) |
|------------------------------------|------------------------------------------------------------|--------------------------------|-------------------------------------------------------------|----------------------------------------------------------------------------------------------------------------------------|------------------------------------------------------------------------------------------------------------------------------------------------------------------------------------------------------------|--------------------------------------------------|
|                                    | Mental Health Clinic                                       |                                | (N=9)                                                       | weeks                                                                                                                      | Lower class: 58.7%<br>Upper/Middle class: 14.3%                                                                                                                                                            |                                                  |
| SSRI: Fluoxetine (N=10)            |                                                            |                                | SRI, SSRI, fluoxetine 35 mg/ day average dose for 12 weeks. | Mean age: 11.6 (range: 7-17)<br>Males: 50%<br>Lower class: 50%<br>Upper/Middle class: 50%                                  |                                                                                                                                                                                                            |                                                  |
| Control (N=11)                     |                                                            |                                | Pill Placebo                                                | Mean age: 11.4 (range: 7-17)<br>Males: 54%<br>Lower class: 45.4%<br>Upper/Middle class: 45.4%                              |                                                                                                                                                                                                            |                                                  |
| Geller, 2007 <sup>5</sup>          | United States RCT Outpatient                               | Anxiety disorder               | SNRI: Atomoxetine (N=87)                                    |                                                                                                                            | Mean age: 12.2 (Range 8 – 17)<br>Male: 62%<br>Caucasian: 77%<br>ADHD: 100%                                                                                                                                 | 0                                                |
|                                    |                                                            |                                | Control (N=89)                                              | Pill Placebo<br>Patients completing 9 <sup>th</sup> visit could participate in an open-label atomoxetine extension period. | Mean age: 11.8 (8 -17)<br>Male: 67.4%<br>Caucasian: 82%<br>ADHD: 100%                                                                                                                                      |                                                  |
| Gittelman-Klein, 1973 <sup>6</sup> | United States RCT Outpatient                               | SP                             | TCA: Imipramine (N=19)                                      | Up to 200mg/day for 6 weeks                                                                                                | Mean age: 10.8 (range: 6-14)                                                                                                                                                                               | 0                                                |
|                                    |                                                            |                                | Control (N=15)                                              | Pill Placebo                                                                                                               |                                                                                                                                                                                                            |                                                  |
| Graae, 1994 <sup>7</sup>           | United States RCT Mental Health Clinic                     | GAD,SAD, SoP, SP<br>CGI>=6: NR | BZD: Clonazepam (N=8)                                       | One tablet of up to 2 mg/ day for 4 weeks.                                                                                 | Mean age: 9.8(range:7-13)<br>Male: 53.3%<br>Caucasian: 100%<br>ADHD: 20%, ODD : 20%,<br>Conduct problems: 7%                                                                                               | 0                                                |
|                                    |                                                            |                                | Control (N=7)                                               | Pill Placebo<br>One tablet a day for 4 weeks                                                                               |                                                                                                                                                                                                            |                                                  |

| Author, Year               | Study country, study design, type of study, study settings | Type of anxiety/Severity (CGI) | Intervention and comparisons (n of patients) | Characteristics of interventions (psychotherapy: components, delivery model)/pharm: drug intensity, duration (weeks)) | Patient characteristics mean age (range) , male (%), race/ethnicity, comorbidity, household income, parent education, family dysfunction/stressor, treatment sequence, insurance, history of maltreatment)             | Follow up after the end of intervention (weeks ) |
|----------------------------|------------------------------------------------------------|--------------------------------|----------------------------------------------|-----------------------------------------------------------------------------------------------------------------------|------------------------------------------------------------------------------------------------------------------------------------------------------------------------------------------------------------------------|--------------------------------------------------|
| March, 2007 <sup>8</sup>   | United States RCT Outpatient                               | SoP                            | SNRI: Venlafaxine (N=140)                    | 37.5 mg/day to a maximum dose of 225mg/day over 16 weeks.                                                             | Mean age: 13.6 (Range 8 – 18)<br>Male: 42.1%<br>Caucasian: 74.28, African: 14.28%<br>Hispanic: 5%, Asian: 1.4%, Other: 2.85%<br>GCI <6 n = 155<br>GCI >6 n = 22                                                        | 0                                                |
|                            |                                                            |                                | Control (N=150)                              | Pill Placebo                                                                                                          | Mean age: 13.6 (Range 8 -16)<br>Male: 43.3%<br>Caucasian: 78.5%, African: 10%,<br>Hispanic: 11.3%, Asian: 1.3%, Other: 2.6%<br>GCI <6 n = 119<br>GCI >6 n = 29                                                         |                                                  |
| Pine, 2001 <sup>9,10</sup> | United States RCT Outpatient                               | GAD,SAD, SoP                   | SSRI: Fluoxetine (N=63)                      | Up to 250 mg per day for 8weeks                                                                                       | Male: 51%<br>Caucasian: 63%, African: 10%, Hispanic : 20%, other: 7%<br>Low income (less than 25k) : 16%,<br>Medium income (25k-60K): 30%<br>High income (> 60K): 46%<br>ADHD: 17.4%, Depression: 4%, OCD: 4%, ODD: 6% | 0                                                |
|                            |                                                            |                                | Control (N=65)                               | Pill Placebo                                                                                                          | Male:52%<br>Caucasian: 62%, African: 5%, Hispanic :18%, other: 15%                                                                                                                                                     |                                                  |

| Author, Year                  | Study country, study design, type of study, study settings | Type of anxiety/Severity (CGI) | Intervention and comparisons (n of patients) | Characteristics of interventions (psychotherapy: components, delivery model)/pharm: drug intensity, duration (weeks)) | Patient characteristics mean age (range) , male (%), race/ethnicity, comorbidity, household income, parent education, family dysfunction/stressor, treatment sequence, insurance, history of maltreatment) | Follow up after the end of intervention (weeks ) |
|-------------------------------|------------------------------------------------------------|--------------------------------|----------------------------------------------|-----------------------------------------------------------------------------------------------------------------------|------------------------------------------------------------------------------------------------------------------------------------------------------------------------------------------------------------|--------------------------------------------------|
|                               |                                                            |                                |                                              |                                                                                                                       | Low income (less than 25k) : 15%,<br>Medium income (25k-60K): 29%<br>High income (> 60K): 42%<br>ADHD: 13%, Depression: 5%,<br>OCD: 5%, ODD: 5%, conduct disorder: 3%                                      |                                                  |
| Reinblatt, 2009 <sup>11</sup> | United States<br>RCT<br>Mental Health Clinic               | GAD,SAD, SoP                   | SSRI:<br>Fluvoxamine<br>(N=22)               | One tablet of up to 300mg/ day for 8 weeks                                                                            | Mean age: 10 ( range: 6-17)<br>Male: 54.5%<br>Caucasian: 95.4%                                                                                                                                             | 0                                                |
|                               |                                                            |                                | Control<br>(N=23)                            | Pill Placebo for 8 weeks                                                                                              | Mean age: 9.7( range: 6-17)<br>Male: 52.2%<br>Caucasian: 95.6%                                                                                                                                             |                                                  |
| Rynn, 2001 <sup>12</sup>      | United States<br>RCT<br>Mental Health Clinic               | GAD                            | SSRI:<br>Sertraline<br>(N=11)                | 25 mg/day for the first week, 50mg for weeks 2-9.                                                                     | Mean age: 11.7 ( Range 5 -17)<br>Male: 77.2%<br>Caucasian: 81.8%                                                                                                                                           | 0                                                |
|                               |                                                            |                                | Control<br>(N=11)                            | Pill Placebo                                                                                                          |                                                                                                                                                                                                            |                                                  |
| Rynn, 2007 <sup>13</sup>      | United States<br>RCT<br>Mental Health Clinic               | Anxiety disorder               | SNRI:<br>Venlafaxine<br>(N=157)              | 37.5 mg/day during the first week. Doses thereafter ranged from 112.5mg – 225mg.                                      | Age: 6 – 17<br>Male: 57.5%                                                                                                                                                                                 | 0                                                |
|                               |                                                            |                                | Control<br>(N=163)                           | Pill Placebo                                                                                                          |                                                                                                                                                                                                            |                                                  |
| Strawn, 2015 <sup>14</sup>    | United States, Mexico, South Africa<br>RCT<br>Outpatient   | SAD, SoP<br>Mean CGI: 4.5      | SNRI:<br>Duloxetine<br>(N=135)               |                                                                                                                       | Mean age: 12.6 (range: 7-17)<br>Male: 65%<br>Caucasian: 83%<br>African American: 6.7%<br>Asian: 0.7%<br>Other:9.6%                                                                                         | 10                                               |

| Author, Year               | Study country, study design, type of study, study settings                     | Type of anxiety/Severity (CGI) | Intervention and comparisons (n of patients)  | Characteristics of interventions (psychotherapy: components, delivery model)/pharm: drug intensity, duration (weeks)) | Patient characteristics mean age (range) , male (%), race/ethnicity, comorbidity, household income, parent education, family dysfunction/stressor, treatment sequence, insurance, history of maltreatment) | Follow up after the end of intervention (weeks ) |
|----------------------------|--------------------------------------------------------------------------------|--------------------------------|-----------------------------------------------|-----------------------------------------------------------------------------------------------------------------------|------------------------------------------------------------------------------------------------------------------------------------------------------------------------------------------------------------|--------------------------------------------------|
|                            |                                                                                |                                | Control (N=137)                               | Pill Placebo                                                                                                          | Mean age: 12.2 (range: 7-17)<br>Male: 62%<br>Caucasian: 81%<br>African American: 7.3%<br>Asian: 0.7%<br>Other:11%                                                                                          |                                                  |
| Wagner, 2004 <sup>15</sup> | United States, South Africa, Canada and Belgium<br>RCT<br>Mental Health Clinic | SoP                            | SSRI: Paroxetine (N=165)                      | 10-50 mg/day for 16 weeks.                                                                                            | Mean age: 13<br>Male: 43%<br>Caucasian: 79.4%, other: 21%                                                                                                                                                  | 16                                               |
|                            |                                                                                |                                | Control (N=157)                               | Pill Placebo<br>Matching placebo pill, once per day.                                                                  | Mean age: 13.3<br>Male: 56.6%<br>Caucasian: 83.4%, other: 16.6%                                                                                                                                            |                                                  |
| Walkup, 2002 <sup>16</sup> | United States<br>RCT<br>Outpatient                                             | GAD, SAD, SoP                  | SSRI: Fluvoxamine (N=35)                      | Up to 250 mg/day for children and 300 mg/day for 32 weeks                                                             | Mean age: 10.2<br>Male: 43%<br>Caucasian: 66%, African American:8%, Hispanic: 20%, other: 6%<br>ADHD: 14%, ODD:6                                                                                           | 0                                                |
|                            |                                                                                |                                | SSRI: Fluvoxamine + Fluoxetine (N=14)         | Fluvoxamine was tapered off during the first 2 weeks with Fluoxetine 10-40 mg/day. for 32 weeks                       | Mean age: 14.1<br>Male: 57%<br>Caucasian: 64%, African American:22%, Hispanic: 7%, other: 7%<br>ADHD: 7%, ODD:0%<br>Fluvoxamine non-responder patients                                                     |                                                  |
|                            |                                                                                |                                | Placebo + SSRI: Pill<br>Placebo + Fluvoxamine | Fluvoxamine was increased by 50 mg/week up to 300 mg/day in adolescents and 250 mg/day for children                   | Mean age: 10.3<br>Male: 48%<br>Caucasian: 65%, African American:6%, Hispanic: 12%,                                                                                                                         |                                                  |

| Author, Year                  | Study country, study design, type of study, study settings | Type of anxiety/Severity (CGI) | Intervention and comparisons (n of patients)                  | Characteristics of interventions (psychotherapy: components, delivery model)/pharm: drug intensity, duration (weeks))                                                                                                           | Patient characteristics mean age (range) , male (%), race/ethnicity, comorbidity, household income, parent education, family dysfunction/stressor, treatment sequence, insurance, history of maltreatment)      | Follow up after the end of intervention (weeks ) |
|-------------------------------|------------------------------------------------------------|--------------------------------|---------------------------------------------------------------|---------------------------------------------------------------------------------------------------------------------------------------------------------------------------------------------------------------------------------|-----------------------------------------------------------------------------------------------------------------------------------------------------------------------------------------------------------------|--------------------------------------------------|
|                               |                                                            |                                | (N=48)                                                        |                                                                                                                                                                                                                                 | other: 8%<br>ADHD: 8%, ODD:2%<br>Placebo non-responder patients                                                                                                                                                 |                                                  |
| Walkup, 2008 <sup>17-23</sup> | United States<br>RCT<br>Outpatient                         | GAD,SAD, SoP                   | Child CBT (N=139)                                             | Coping cat<br>Child CBT (parents included <20%)<br>Individual-based., Exposure, relaxation, cognitive problem solving.<br>60-minute session once a week for 12 weeks.                                                           | Mean age: 10.5<br>Male: 49.2%<br>Caucasian: 76.3%, African American:10.1%, Hispanic: 9.2%, other: 4.5%<br>Low income: 23.7%<br>ADHD: 11.5%, ODD:13.8%,<br>Tic disorder and other internalizing disorders: 41.7% | 0                                                |
|                               |                                                            |                                | SSRI: Sertraline (N=133)                                      | Beginning with 25mg/day Up to 200 mg/day by 8 <sup>th</sup> week, for 12 weeks.                                                                                                                                                 | Mean age: 10.8<br>Male: 51.1%<br>Caucasian: 77.4%, African American: 9%, Hispanic: 11.3%, other: 2.3%<br>Low income: 26.3%<br>ADHD: 12.7%, ODD:8.2%, Tic disorder and other internalizing disorders: 55.6%      |                                                  |
|                               |                                                            |                                | Combination therapy: CBT+ SSRI: Child CBT+ Sertraline (N=140) | Coping cat,<br>Child CBT (parents included <20%)<br>Individual-based, Exposure, relaxation and cognitive problem solving plus Sertraline.<br>60-minute session once a week for 12 weeks plus up to 200 mg/day day for 12 weeks. | Mean age: 10.7<br>Male: 49.6%<br>Caucasian: 82.9%, African American: 7.9%, Hispanic: 5.6%, other: 3.6%<br>Low income: 25.0%<br>ADHD: 11.4%, ODD:10%, Tic disorder and other internalizing disorders: 42.8%      |                                                  |

| Author, Year | Study country, study design, type of study, study settings | Type of anxiety/Severity (CGI) | Intervention and comparisons (n of patients) | Characteristics of interventions (psychotherapy: components, delivery model)/pharm: drug intensity, duration (weeks)) | Patient characteristics mean age (range) , male (%), race/ethnicity, comorbidity, household income, parent education, family dysfunction/stressor, treatment sequence, insurance, history of maltreatment) | Follow up after the end of intervention (weeks ) |
|--------------|------------------------------------------------------------|--------------------------------|----------------------------------------------|-----------------------------------------------------------------------------------------------------------------------|------------------------------------------------------------------------------------------------------------------------------------------------------------------------------------------------------------|--------------------------------------------------|
|              |                                                            |                                | Control (N=76)                               | Pill Placebo                                                                                                          | Mean age: 10.6<br>Male : 51.3%<br>Caucasian: 79%, African American: 9%, Hispanic: 9%, other: 3%<br>Low income: 27.6%<br>ADHD: 118%, ODD:9.2%, Tic disorder and other internalizing disorders: 44.7%        |                                                  |

ADHD: attention deficit hyperactivity disorder, CBT: cognitive behavioral therapy, CGI: clinical global impression scale. GAD: generalized anxiety disorder, NR: not reported, OCD: obsessive compulsive disorder, ODD: oppositional defiant disorder, RCT: randomized control trial, SAD: separation anxiety disorder, SoP: social anxiety, SP: specific phobia, SRI: serotonin reuptake inhibitor, SSRI: selective serotonin reuptake inhibitor

**eTable 2.** Characteristics of the included studies comparing medications vs medications

| Author, Year                | Study country, study design, type of study, study settings | Type of anxiety/Severity (CGI) | Intervention and comparisons (n of patients) | Characteristics of interventions (psychotherapy: components, delivery model)/pharm: drug intensity, duration (weeks)) | Patient characteristics mean age (range) , male (%), race/ethnicity, comorbidity, household income, parent education, family dysfunction/stressor, treatment sequence, insurance, history of maltreatment) | Follow up after the end of intervention (weeks ) |
|-----------------------------|------------------------------------------------------------|--------------------------------|----------------------------------------------|-----------------------------------------------------------------------------------------------------------------------|------------------------------------------------------------------------------------------------------------------------------------------------------------------------------------------------------------|--------------------------------------------------|
| da Costa, 2013 <sup>4</sup> | Brazil<br>RCT<br>Mental Health Clinic                      | GAD, SAD, SP<br>Mean CGI= 4.9  | TCA:<br>Clomipramine<br>(N=9)                | Clomipramine<br>118.75 mg/ day average dose,<br>12 weeks                                                              | Mean age: 11.2 (range: 7-17)<br>Males: 33%<br>Lower class: 58.7%<br>Upper/Middle class: 14.3%                                                                                                              | 0                                                |
|                             |                                                            |                                | SSRI:<br>Fluoxetine<br>(N=10)                | SRI, SSRI, fluoxetine<br>35 mg/ day average dose for<br>12 weeks.                                                     | Mean age: 11.6 (range: 7-17)<br>Males: 50%<br>Lower class: 50%<br>Upper/Middle class: 50%                                                                                                                  |                                                  |
|                             |                                                            |                                | Control<br>(N=11)                            | Pill Placebo                                                                                                          | Mean age: 11.4 (range: 7-17)<br>Males: 54%<br>Lower class: 45.4%<br>Upper/Middle class: 45.4%                                                                                                              |                                                  |
| Rynn, 2007 <sup>13</sup>    | United States<br>RCT<br>Mental Health Clinic               | Anxiety disorder               | SNRI:<br>Venlafaxine<br>(N=157)              | 37.5 mg/day during the first week. Doses thereafter ranged from 112.5mg – 225mg.                                      | Age: 6 – 17<br>Male: 57.5%                                                                                                                                                                                 | 0                                                |
|                             |                                                            |                                | Control<br>(N=163)                           | Pill Placebo                                                                                                          |                                                                                                                                                                                                            |                                                  |

CGI: clinical global impression scale, GAD: generalized anxiety disorder, NR: not reported, OCD: obsessive compulsive disorder, RCT: randomized controlled trial, SAD: separation anxiety disorder, SNRI: serotonin–norepinephrine reuptake inhibitor, SoP: social anxiety, SP: specific phobia, SRI: serotonin reuptake inhibitor, SSRI: selective serotonin reuptake inhibitor.

**eTable 3.** Characteristics of the included studies comparing CBT vs medications

| Author, Year                  | Study country, study design, type of study, study settings | Type of anxiety/Severity (CGI) | Intervention and comparisons (n of patients) | Characteristics of interventions (psychotherapy: components, delivery model)/pharm: drug intensity, duration (weeks))                                                                                                                               | Patient characteristics mean age (range) , male (%), race/ethnicity, comorbidity, household income, parent education, family dysfunction/stressor, treatment sequence, insurance, history of maltreatment)   | Follow up after the end of intervention (weeks ) |
|-------------------------------|------------------------------------------------------------|--------------------------------|----------------------------------------------|-----------------------------------------------------------------------------------------------------------------------------------------------------------------------------------------------------------------------------------------------------|--------------------------------------------------------------------------------------------------------------------------------------------------------------------------------------------------------------|--------------------------------------------------|
| Beidel, 2007 <sup>24</sup>    | United States RCT Mental Health Clinic                     | GAD, SAD, SP, SoP              | SSRI: Fluoxetine (N=43)                      | 10mg per day during week 1 and 2. Increasing dose up to 40mg/day for up to 12 weeks.                                                                                                                                                                | Mean age:11.56 (Range 7 – 17)<br>Male: 53.23%<br>Caucasian: 74.1%<br>African American: 15.1%<br>Hispanic: 2.1%<br>Asian: 2.8%<br>Other: 3.5%                                                                 | 52                                               |
|                               |                                                            |                                | Child CBT (N=59)                             | Social Effectiveness Therapy (SET-C)<br>Child CBT (Parents included <20%)<br>Group and Individual based, Exposure, Relaxation, and Cognitive Problem Solving.<br>60 min individual session and one 150 min group session twice a week for 12 weeks. |                                                                                                                                                                                                              |                                                  |
|                               |                                                            |                                | Control (N=37)                               | Pill Placebo                                                                                                                                                                                                                                        |                                                                                                                                                                                                              |                                                  |
| Walkup, 2008 <sup>17-23</sup> | United States RCT Outpatient                               | GAD,SAD, SoP                   | Child CBT (N=139)                            | Coping cat<br>Child CBT (parents included <20%)<br>Individual-based., Exposure, relaxation, cognitive problem solving.<br>60-minute session once a week for 12 weeks.                                                                               | Mean age: 10.5<br>Male: 49.2%<br>Caucasian: 76.3%, African American:10.1%, Hispanic: 9.2%, other: 4.5%<br>Low income: 23.7%<br>ADHD: 11.5%, ODD:13.8%, Tic disorder and other internalizing disorders: 41.7% | 0                                                |
|                               |                                                            |                                | SSRI: Sertraline (N=133)                     | Beginning with 25mg/day Up to 200 mg/day by 8 <sup>th</sup> week, for 12 weeks.                                                                                                                                                                     |                                                                                                                                                                                                              |                                                  |



| Author, Year | Study country, study design, type of study, study settings | Type of anxiety/Severity (CGI) | Intervention and comparisons (n of patients)                        | Characteristics of interventions (psychotherapy: components, delivery model)/pharm: drug intensity, duration (weeks))                                                                                                  | Patient characteristics mean age (range) , male (%), race/ethnicity, comorbidity, household income, parent education, family dysfunction/stressor, treatment sequence, insurance, history of maltreatment)    | Follow up after the end of intervention (weeks ) |
|--------------|------------------------------------------------------------|--------------------------------|---------------------------------------------------------------------|------------------------------------------------------------------------------------------------------------------------------------------------------------------------------------------------------------------------|---------------------------------------------------------------------------------------------------------------------------------------------------------------------------------------------------------------|--------------------------------------------------|
|              |                                                            |                                |                                                                     |                                                                                                                                                                                                                        | 11.3%, other: 2.3%<br>Low income: 26.3%<br>ADHD: 12.7%, ODD:8.2%,<br>Tic disorder and other internalizing disorders: 55.6%                                                                                    |                                                  |
|              |                                                            |                                | Combination therapy:<br>CBT+ SSRI:<br>Child CBT+ Sertraline (N=140) | Coping cat, Child CBT (parents included <20%) Individual-based, Exposure, relaxation and cognitive problem solving plus Sertraline. 60-minute session once a week for 12 weeks plus up to 200 mg/day day for 12 weeks. | Mean age: 10.7<br>Male: 49.6%<br>Caucasian: 82.9%, African American: 7.9%, Hispanic: 5.6%, other: 3.6%<br>Low income: 25.0%<br>ADHD: 11.4%, ODD:10%,<br>Tic disorder and other internalizing disorders: 42.8% |                                                  |
|              |                                                            |                                | Control (N=76)                                                      | Pill Placebo                                                                                                                                                                                                           | Mean age: 10.6<br>Male : 51.3%<br>Caucasian: 79%, African American: 9%, Hispanic: 9%, other: 3%<br>Low income: 27.6%<br>ADHD: 11.8%, ODD:9.2%,<br>Tic disorder and other internalizing disorders: 44.7%       |                                                  |

ADHD: attention deficit hyperactivity disorder, CBT: cognitive behavioral therapy, CGI: clinical global impression scale, GAD: generalized anxiety disorder, ICBT: individual cognitive behavioral therapy, ODD: oppositional defiant disorder, RCT: randomized controlled trial, SAD: separation anxiety disorder, SoP: social anxiety, SP: specific phobia, SSRI: selective serotonin reuptake inhibitor.

**eTable 4.** Characteristics of the included studies comparing CBT vs wait-listing/no treatment

| Author, Year                | Study country, study design, type of study, study settings | Type of anxiety/Severity (CGI) | Intervention and comparisons (n of patients) | Characteristics of interventions (psychotherapy: components, delivery model)/pharm: drug intensity, duration (weeks))                                                                 | Patient characteristics mean age (range) , male (%), race/ethnicity, comorbidity, household income, parent education, family dysfunction/stressor, treatment sequence, insurance, history of maltreatment) | Follow up after the end of intervention (weeks ) |
|-----------------------------|------------------------------------------------------------|--------------------------------|----------------------------------------------|---------------------------------------------------------------------------------------------------------------------------------------------------------------------------------------|------------------------------------------------------------------------------------------------------------------------------------------------------------------------------------------------------------|--------------------------------------------------|
| Abbasi, 2016 <sup>25</sup>  | Iran<br>RCT<br>Mental Health Clinic                        | SAD                            | Child CBT (N=15)                             | Modular CBT<br>Child CBT- (parents included < 20%)<br>Individual based<br>Exposure<br>Cognitive problem solving<br>4-20 sessions, 1 hour sessions, with                               | Age range : 6-7 years<br>Male: 53%                                                                                                                                                                         | 13                                               |
|                             |                                                            |                                | Other Therapy (N=15)                         | Other: Child parent relationship training<br>Individual based<br>10 weekly, 1 hour sessions                                                                                           | Age range : 6-7 years<br>Male: 33.3%                                                                                                                                                                       |                                                  |
|                             |                                                            |                                | Control (N=16)                               | Waitlisting or no treatment                                                                                                                                                           | Age range : 6-7 years<br>Male: 48%                                                                                                                                                                         |                                                  |
| Afshari, 2014 <sup>26</sup> | Iran<br>RCT<br>Outpatient Mental Health Clinic             | SAD                            | Child CBT (N=12)                             | Coping Cat<br>Child CBT- (parents included < 20%)<br>Group based<br>Exposure<br>Relaxation<br>Cognitive problem solving<br>10, 60 min weekly sessions<br>Delivered by student/trainee | Mean age: 10.4 (range: 9-13)                                                                                                                                                                               | 12                                               |
|                             |                                                            |                                | Child CBT (N=12)                             | Other: Emotion-focused CBT<br>Child CBT- (parents included < 20%)<br>Group based<br>Cognitive problem solving<br>12 one hour weekly sessions                                          | Mean age: 11 (range: 9-13)                                                                                                                                                                                 |                                                  |

| Author, Year               | Study country, study design, type of study, study settings | Type of anxiety/Severity (CGI)                                 | Intervention and comparisons (n of patients) | Characteristics of interventions (psychotherapy: components, delivery model)/pharm: drug intensity, duration (weeks))              | Patient characteristics mean age (range) , male (%), race/ethnicity, comorbidity, household income, parent education, family dysfunction/stressor, treatment sequence, insurance, history of maltreatment)                                                                                                                                                                                      | Follow up after the end of intervention (weeks ) |
|----------------------------|------------------------------------------------------------|----------------------------------------------------------------|----------------------------------------------|------------------------------------------------------------------------------------------------------------------------------------|-------------------------------------------------------------------------------------------------------------------------------------------------------------------------------------------------------------------------------------------------------------------------------------------------------------------------------------------------------------------------------------------------|--------------------------------------------------|
|                            |                                                            |                                                                |                                              | Delivered by student/trainee                                                                                                       |                                                                                                                                                                                                                                                                                                                                                                                                 |                                                  |
|                            |                                                            |                                                                | Control (N=10)                               | Waitlisting or no treatment                                                                                                        | Mean age: 10.3 (range: 9-13)                                                                                                                                                                                                                                                                                                                                                                    |                                                  |
| Arendt, 2015 <sup>27</sup> | Denmark RCT Mental Health Clinic                           | GAD, PD with agoraphobia, PD without agoraphobia, SAD, SoP, SP | Child and parent CBT (N=56)                  | Cool Kids Group-based Exposure Cognitive problem solving 10 sessions, 2 hour weekly sessions Delivered by psychologist and student | Mean age: 11.82 (SD: 2.49)<br>Male: 45%<br>Low income:( <\$93,109): 21.4%<br>Medium income:(\$93,1009-\$130,353): 71.5%<br>High income:(>\$167,597): 7.1%<br>Less than high school or high school graduate(parent):4.5%<br>Some college(parent): 24.45%<br>College graduate(parent): 71.05%<br>OCD: 7.1%<br>Externalizing disorders: 10.7%<br>Mood disorders: 7.1%<br>Other comorbidities: 5.4% | 52                                               |
|                            |                                                            |                                                                | Control (N=53)                               | Waitlisting or no treatment                                                                                                        | Mean age: 11.73 (SD: 2.47)<br>Male: 42%<br>Low income:( <\$93,109): 37.7%<br>Medium income:(\$93,1009-\$130,353): 52.9%                                                                                                                                                                                                                                                                         |                                                  |

| Author, Year                | Study country, study design, type of study, study settings | Type of anxiety/Severity (CGI) | Intervention and comparisons (n of patients) | Characteristics of interventions (psychotherapy: components, delivery model)/pharm: drug intensity, duration (weeks))                                                                                                         | Patient characteristics mean age (range) , male (%), race/ethnicity, comorbidity, household income, parent education, family dysfunction/stressor, treatment sequence, insurance, history of maltreatment)                                                           | Follow up after the end of intervention (weeks ) |
|-----------------------------|------------------------------------------------------------|--------------------------------|----------------------------------------------|-------------------------------------------------------------------------------------------------------------------------------------------------------------------------------------------------------------------------------|----------------------------------------------------------------------------------------------------------------------------------------------------------------------------------------------------------------------------------------------------------------------|--------------------------------------------------|
|                             |                                                            |                                |                                              |                                                                                                                                                                                                                               | High income:(>\$167,597): 9.4%<br>Less than high school or high school graduate(parent):12.4%<br>Some college(parent): 29.1%<br>College graduate(parent): 58.5%<br>OCD: 7.6%<br>Externalizing disorders: 13.2%<br>Mood disorders: 11.3%<br>Other comorbidities: 7.5% |                                                  |
| Baer, 2005 <sup>28</sup>    | Canada<br>RCT<br>Mental Health Clinic                      | SoP                            | Child CBT (N=6)                              | Social Effectiveness Therapy (SET-C)<br>Child CBT- (parents included < 20%)<br>Group based<br>Exposure<br>Cognitive problem solving 12 weekly 1.5-hour child sessions plus one parent session<br>Delivered by 2 psychiatrists | Mean age: 14.5 (Range 13 – 18)<br>Male: 50%                                                                                                                                                                                                                          | NR                                               |
|                             |                                                            |                                | Control (N=6)                                | Waitlisting or no treatment                                                                                                                                                                                                   |                                                                                                                                                                                                                                                                      |                                                  |
| Barrett, 1996 <sup>29</sup> | Australia<br>RCT<br>Mental Health                          | GAD, SAD, SoP                  | Child CBT (N = 28)                           | Coping Koala<br>Child CBT- (parents included < 20%)                                                                                                                                                                           | Age range: 7 – 14 years                                                                                                                                                                                                                                              | 52                                               |

| Author, Year                  | Study country, study design, type of study, study settings | Type of anxiety/Severity (CGI) | Intervention and comparisons (n of patients)                                                                                                                                                                                              | Characteristics of interventions (psychotherapy: components, delivery model)/pharm: drug intensity, duration (weeks))                                                                                       | Patient characteristics mean age (range) , male (%), race/ethnicity, comorbidity, household income, parent education, family dysfunction/stressor, treatment sequence, insurance, history of maltreatment) | Follow up after the end of intervention (weeks ) |
|-------------------------------|------------------------------------------------------------|--------------------------------|-------------------------------------------------------------------------------------------------------------------------------------------------------------------------------------------------------------------------------------------|-------------------------------------------------------------------------------------------------------------------------------------------------------------------------------------------------------------|------------------------------------------------------------------------------------------------------------------------------------------------------------------------------------------------------------|--------------------------------------------------|
|                               | Clinic                                                     |                                |                                                                                                                                                                                                                                           | Individual based<br>Exposure, Relaxation and Cognitive problem solving<br>12 sessions, 60-80 minute weekly;<br>4 sessions on anxiety management<br>Delivered by doctoral level psychologists.               |                                                                                                                                                                                                            |                                                  |
| Child and parent CBT (N = 25) |                                                            |                                | Coping Koala<br>Individual based<br>Exposure ,Relaxation and Cognitive problem solving<br>12 session, 70 minute weekly sessions (30 minutes for CBTand 40 minutess for family intervention)<br>Delivered by doctoral level psychologists. |                                                                                                                                                                                                             |                                                                                                                                                                                                            |                                                  |
| Control (N=26)                |                                                            |                                | Waitlisting or no treatment                                                                                                                                                                                                               |                                                                                                                                                                                                             |                                                                                                                                                                                                            |                                                  |
| Barrett, 1998 <sup>30</sup>   | Australia<br>RCT<br>Mental Health Clinic                   | GAD, SAD, SP, SoP.             | Child CBT (N=23)                                                                                                                                                                                                                          | Coping Koala<br>Child CBT- (parents included < 20%)<br>Group based<br>Exposure<br>Relaxation<br>Cognitive problem solving<br>12 sessions, 2 hours weekly sessions<br>Delivered by 4 clinical psychologists. | Age range: 7 – 14 years<br>Male: 53.3%                                                                                                                                                                     | 52                                               |
|                               |                                                            |                                | Child and                                                                                                                                                                                                                                 | Coping koala                                                                                                                                                                                                |                                                                                                                                                                                                            |                                                  |

| Author, Year                  | Study country, study design, type of study, study settings | Type of anxiety/Severity (CGI)                        | Intervention and comparisons (n of patients)       | Characteristics of interventions (psychotherapy: components, delivery model)/pharm: drug intensity, duration (weeks))                                                                          | Patient characteristics mean age (range) , male (%), race/ethnicity, comorbidity, household income, parent education, family dysfunction/stressor, treatment sequence, insurance, history of maltreatment) | Follow up after the end of intervention (weeks ) |
|-------------------------------|------------------------------------------------------------|-------------------------------------------------------|----------------------------------------------------|------------------------------------------------------------------------------------------------------------------------------------------------------------------------------------------------|------------------------------------------------------------------------------------------------------------------------------------------------------------------------------------------------------------|--------------------------------------------------|
|                               |                                                            |                                                       | parent together CBT (N=17)                         | Group-CBT and family management training<br>Group based<br>Exposure<br>Relaxation<br>Cognitive problem solving<br>12 sessions, 2 hour weekly sessions<br>Delivered by therapists               |                                                                                                                                                                                                            |                                                  |
|                               |                                                            |                                                       | Control (N=20)                                     | Waitlisting or no treatment                                                                                                                                                                    |                                                                                                                                                                                                            |                                                  |
| Bodden, 2008 <sup>31,32</sup> | Netherlands RCT Mental Health Clinic                       | PD (agoraphobia is not specified), SAD, SP, SoP, GAD  | Child CBT (N=64)                                   | Generic CBT<br>Individual based, exposure, cognitive strategies delivered by psychotherapists.<br>60 - 90 min session per week for 13 weeks                                                    | Age mean (years): 12.4 (range: 8-17)<br>Males: 40.6%<br>Caucasian: 100%<br>ADHD: 8%<br>Depression: 24%<br>OCD: 5%<br>ODD: 1%<br>Conduct problems: 1%<br>PTSD: 6%                                           | 13                                               |
|                               |                                                            |                                                       | Control (N=64)                                     | Waitlisting or no treatment                                                                                                                                                                    |                                                                                                                                                                                                            |                                                  |
| Chalfant, 2007 <sup>33</sup>  | Australia RCT Mental Health Clinic                         | GAD ,PD (agoraphobia is not specified) SAD, SP , SoP. | Child CBT plus separate parent intervention (N=28) | Cool Kids<br>Adaptation of the program for children with autism<br>Group based<br>Exposure<br>Relaxation<br>Cognitive problem solving<br>12 sessions, 9 weekly plus 3 booster monthly sessions | Age: 10.8 ( Range 8 – 13)                                                                                                                                                                                  | NR                                               |

| Author, Year               | Study country, study design, type of study, study settings | Type of anxiety/Severity (CGI)             | Intervention and comparisons (n of patients) | Characteristics of interventions (psychotherapy: components, delivery model)/pharm: drug intensity, duration (weeks))                                                                  | Patient characteristics mean age (range) , male (%), race/ethnicity, comorbidity, household income, parent education, family dysfunction/stressor, treatment sequence, insurance, history of maltreatment)                                                                           | Follow up after the end of intervention (weeks ) |
|----------------------------|------------------------------------------------------------|--------------------------------------------|----------------------------------------------|----------------------------------------------------------------------------------------------------------------------------------------------------------------------------------------|--------------------------------------------------------------------------------------------------------------------------------------------------------------------------------------------------------------------------------------------------------------------------------------|--------------------------------------------------|
|                            |                                                            |                                            |                                              | Delivered by a doctoral level psychologist and master level clinicians.                                                                                                                |                                                                                                                                                                                                                                                                                      |                                                  |
|                            |                                                            |                                            | Control (N=19)                               | Waitlisting or no treatment                                                                                                                                                            |                                                                                                                                                                                                                                                                                      |                                                  |
| Chiu, 2013 <sup>34</sup>   | United States RCT School                                   | GAD, SAD, SoP                              | Child CBT (N=22)                             | Building confidence<br>Child CBT- (parents included < 20%)<br>Individual based<br>Exposure<br>Cognitive problem solving<br>10 to 16 60-minute sessions<br>Delivered by student/trainee | Mean age: 8.51 (range: 5-12)<br>Males: 55%<br>Caucasian: 40%<br>African American: 15%<br>Hispanic: 18%<br>Asian: 5%<br>Other: 23%<br>Low income (<\$40,000)= 17.5%<br>Medium income (\$40,000-\$70,000)=17.5%<br>High income (>\$90,000): 67.5%<br>ADHD: 15%<br>OCD: 5%<br>ODD: 7.5% | 0                                                |
|                            |                                                            |                                            | Control (N=18)                               | Waitlisting or no treatment                                                                                                                                                            |                                                                                                                                                                                                                                                                                      |                                                  |
| Cobham, 2012 <sup>35</sup> | Australia RCT Mental Health Clinic                         | GAD, PD, PD with agoraphobia, SAD, SoP, SP | Child CBT plus separate parent intervention  | Do as I do<br>Individual-based<br>Exposure<br>Cognitive problem solving<br>6 90-minutes sessions for parent                                                                            | Mean age: 9.70 (range: 7-14)<br>Males: 50%<br>Caucasian 92%<br>Asian: 8%                                                                                                                                                                                                             | 26                                               |

| Author, Year              | Study country, study design, type of study, study settings | Type of anxiety/Severity (CGI) | Intervention and comparisons (n of patients) | Characteristics of interventions (psychotherapy: components, delivery model)/pharm: drug intensity, duration (weeks))                                                                                                               | Patient characteristics mean age (range) , male (%), race/ethnicity, comorbidity, household income, parent education, family dysfunction/stressor, treatment sequence, insurance, history of maltreatment) | Follow up after the end of intervention (weeks ) |
|---------------------------|------------------------------------------------------------|--------------------------------|----------------------------------------------|-------------------------------------------------------------------------------------------------------------------------------------------------------------------------------------------------------------------------------------|------------------------------------------------------------------------------------------------------------------------------------------------------------------------------------------------------------|--------------------------------------------------|
|                           |                                                            |                                | (N=23)                                       | and 6 60-minutes for child, weekly<br>Delivered by masters level clinicians                                                                                                                                                         | PTSD: 4%<br>ADHD: 7%<br>Dysthymia: 4%<br>Enuresis: 4%                                                                                                                                                      |                                                  |
|                           |                                                            |                                | Distance Therapy (N=20)                      | Do as I do<br>"Do as I Do" and "Facing your Fears" bibliotherapy programs<br>Exposure<br>Cognitive problem solving<br>2 hour parent group, every other week<br>12 min phone calls for 12 weeks<br>Delivered by parent and therapist | Mean age: 10.20 (range: 7-14)<br>Males: 55%<br>Caucasian 92%<br>Asian: 8%<br>ADHD: 5%<br>PTSD: 5%<br>Dysthymia: 5%<br>Sleep terrors: 5%                                                                    |                                                  |
|                           |                                                            |                                | Control (N=12)                               | Waitlisting or no treatment                                                                                                                                                                                                         | Mean age: 9.83 (range: 7-14)<br>Males: 57%<br>Caucasian 92%<br>Asian: 8%<br>PTSD: 4%                                                                                                                       |                                                  |
| Dewis, 2001 <sup>36</sup> | Australia<br>RCT<br>Mental Health Clinic                   | SP                             | Child CBT (N=9)                              | Generic CBT<br>Live graded exposure<br>Child CBT- (parents included < 20%)<br>Individual based<br>Exposure<br>Three 45-min treatment sessions every 3–4 days<br>Provided by clinical psychologists                                  | Male: 35.7%<br>Caucasian: 100%<br>Mean age: 12.3 (Range 10-17)                                                                                                                                             | 4                                                |



| Author, Year                              | Study country, study design, type of study, study settings | Type of anxiety/Severity (CGI) | Intervention and comparisons (n of patients) | Characteristics of interventions (psychotherapy: components, delivery model)/pharm: drug intensity, duration (weeks))                                                           | Patient characteristics mean age (range) , male (%), race/ethnicity, comorbidity, household income, parent education, family dysfunction/stressor, treatment sequence, insurance, history of maltreatment) | Follow up after the end of intervention (weeks ) |
|-------------------------------------------|------------------------------------------------------------|--------------------------------|----------------------------------------------|---------------------------------------------------------------------------------------------------------------------------------------------------------------------------------|------------------------------------------------------------------------------------------------------------------------------------------------------------------------------------------------------------|--------------------------------------------------|
|                                           |                                                            |                                | Distance Therapy (N=10)                      | Other: Computer-aided vicarious Exposure<br>Individual computer based<br>Three 45-min treatment sessions every 3–4 days                                                         | Male: 35.7%<br>Caucasian: 100%<br>Mean age: 13.8 (Range 10-17)                                                                                                                                             |                                                  |
|                                           |                                                            |                                | Control (N=9)                                | Waitlisting or no treatment                                                                                                                                                     | Male: 35.7%<br>Caucasian: 100%<br>Mean age: 13.3 ( Range 10 – 17)                                                                                                                                          |                                                  |
| Donovan, 2015 <sup>37</sup>               | Australia<br>RCT<br>Mental Health Clinic                   | GAD, SAD, SoP, SP              | Child and parent together CBT (N=21)         | Other: SHY<br>Group based<br>Exposure<br>Relaxation<br>Cognitive problem solving<br>4 3-hour sessions over 3 consecutive weekends<br>Delivered by psychologist, student/trainee | Mean age: 9.43 (range: 7-12)<br>Males: 37.5%<br>Caucasian: 97.5%<br>Asian: 2.5%<br>Low income(<74,000): 45%<br>High income(>74,000): 55%<br>ADHD: 5%<br>OCD: 5%<br>ODD: 5%<br>PTSD: 2.5%                   | 26                                               |
|                                           |                                                            |                                | Control (N=19)                               | Waitlisting or no treatment                                                                                                                                                     |                                                                                                                                                                                                            |                                                  |
| Flannery-Schroeder, 2000 <sup>38,39</sup> | United States<br>RCT<br>Outpatient                         | GAD,SAD, SoP, SP               | Child CBT (N=18)                             | Coping Cat<br>Child CBT- (parents included < 20%)<br>Individual based<br>Exposure<br>Relaxation<br>Cognitive problem solving<br>18 sessions, 50-60 minute weekly sessions       | Male: 33.3%<br>Caucasian: 94.4%, Other: 5.6%<br>ADHD: 11%, Depression: 5.6%                                                                                                                                | 13                                               |

| Author, Year                  | Study country, study design, type of study, study settings | Type of anxiety/Severity (CGI)              | Intervention and comparisons (n of patients) | Characteristics of interventions (psychotherapy: components, delivery model)/pharm: drug intensity, duration (weeks))                                                                                  | Patient characteristics mean age (range) , male (%), race/ethnicity, comorbidity, household income, parent education, family dysfunction/stressor, treatment sequence, insurance, history of maltreatment) | Follow up after the end of intervention (weeks ) |
|-------------------------------|------------------------------------------------------------|---------------------------------------------|----------------------------------------------|--------------------------------------------------------------------------------------------------------------------------------------------------------------------------------------------------------|------------------------------------------------------------------------------------------------------------------------------------------------------------------------------------------------------------|--------------------------------------------------|
|                               |                                                            |                                             |                                              | Delivered by master students                                                                                                                                                                           |                                                                                                                                                                                                            |                                                  |
|                               |                                                            |                                             | Child CBT (N=13)                             | Coping Cat<br>Child CBT- (parents included < 20%)<br>Individual based<br>Exposure<br>Relaxation<br>Cognitive problem solving<br>18 sessions, 90 minute weekly sessions<br>Delivered by master students | Male: 61.5%<br>Caucasian: 84.6%, Other: 15.4%<br>ADHD: 30.7%, Depression: 15.3%, ODD: 23%                                                                                                                  |                                                  |
|                               |                                                            |                                             | Control (N=14)                               | Waitlisting or no treatment                                                                                                                                                                            | Male: 42.8%<br>Caucasian: 92.8%, Other: 7.2%<br>ADHD: 21.4%                                                                                                                                                |                                                  |
| Gallagher, 2004 <sup>40</sup> | United States<br>RCT<br>Mental Health Clinic               | GAD, SP, SAD, SoP.                          | Child CBT (N=12)                             | Generic CBT<br>Child CBT-(parents included < 20%)<br>Group based<br>Exposure<br>Cognitive problem solving<br>3 sessions, 3-hour weekly sessions                                                        | Age (range 8 – 11)                                                                                                                                                                                         | 3                                                |
|                               |                                                            |                                             | Control (N=11)                               | Waitlisting or no treatment                                                                                                                                                                            | Age (range 8 – 11)                                                                                                                                                                                         |                                                  |
| Gallo, 2012 <sup>41</sup>     | United States<br>RCT<br>Mental Health Clinic               | PD with agoraphobia, PD without agoraphobia | Child CBT (N=39)                             | Other: Immediate 8-day intensive treatment<br>Child CBT- (parents included < 20%)<br>Individual based<br>Exposure and Cognitive problem solving                                                        | Mean age: 15.1 (range 12 – 17)<br>Male: 40%<br>Caucasian: 49%<br>Hispanic: 4%                                                                                                                              |                                                  |

| Author, Year                   | Study country, study design, type of study, study settings | Type of anxiety/Severity (CGI) | Intervention and comparisons (n of patients)      | Characteristics of interventions (psychotherapy: components, delivery model)/pharm: drug intensity, duration (weeks))                                                                         | Patient characteristics mean age (range) , male (%), race/ethnicity, comorbidity, household income, parent education, family dysfunction/stressor, treatment sequence, insurance, history of maltreatment) | Follow up after the end of intervention (weeks ) |
|--------------------------------|------------------------------------------------------------|--------------------------------|---------------------------------------------------|-----------------------------------------------------------------------------------------------------------------------------------------------------------------------------------------------|------------------------------------------------------------------------------------------------------------------------------------------------------------------------------------------------------------|--------------------------------------------------|
|                                |                                                            |                                |                                                   | 8 days of 2 to 6 hours of treatment (20 hours total) followed by 4 weeks of phone contact                                                                                                     |                                                                                                                                                                                                            |                                                  |
|                                |                                                            |                                | Control (N=16)                                    | Waitlisting or no treatment                                                                                                                                                                   |                                                                                                                                                                                                            |                                                  |
| Gil-Bernal, 2009 <sup>42</sup> | Mexico<br>RCT<br>Public schools in low income district     | SoP                            | Child CBT (N=6)                                   | IAFS<br>Child CBT- (parents included < 20%)<br>Group based<br>Exposure and Cognitive problem solving<br>Nine 90-minutes sessions during 5 weeks<br>Delivered by therapists                    | Age: Range 7 – 12<br>Male: 36.36%                                                                                                                                                                          | 36                                               |
|                                |                                                            |                                | Child CBT plus separate parent intervention (N=5) | IAFS<br>Combined therapy: IAFS + Parent education<br>Group based<br>Exposure<br>Relaxation<br>Cognitive problem solving<br>Nine 90-minutes sessions during 5 weeks<br>Delivered by therapists |                                                                                                                                                                                                            |                                                  |
|                                |                                                            |                                | Control (N=6)                                     | Waitlisting or no treatment                                                                                                                                                                   |                                                                                                                                                                                                            |                                                  |
| Hancock, 2016 <sup>43</sup>    | Australia<br>RCT<br>Mental Health Clinic                   | GAD, SAD                       | ACT (N=68)                                        | Acceptance and commitment therapy (ACT)<br>Group based<br>Relaxation                                                                                                                          | Mean age: 11.15 ( range: 7-17)<br>Male: 45.5%<br>Caucasian: 87%, Asian: 3%,                                                                                                                                | 13                                               |

| Author, Year                | Study country, study design, type of study, study settings | Type of anxiety/Severity (CGI) | Intervention and comparisons (n of patients) | Characteristics of interventions (psychotherapy: components, delivery model)/pharm: drug intensity, duration (weeks))                                                    | Patient characteristics mean age (range) , male (%), race/ethnicity, comorbidity, household income, parent education, family dysfunction/stressor, treatment sequence, insurance, history of maltreatment) | Follow up after the end of intervention (weeks ) |
|-----------------------------|------------------------------------------------------------|--------------------------------|----------------------------------------------|--------------------------------------------------------------------------------------------------------------------------------------------------------------------------|------------------------------------------------------------------------------------------------------------------------------------------------------------------------------------------------------------|--------------------------------------------------|
|                             |                                                            |                                |                                              | 10 sessions, 90-minute weekly sessions<br>Delivered by doctoral level psychologist                                                                                       | Other: 10%<br>ADHD: 6%, Depression, 18%, OCD: 7.3%<br>Treatment naïve: 27.9%                                                                                                                               |                                                  |
|                             |                                                            |                                | Child and parent together CBT (N=63)         | Cool Kids<br>Group based<br>Exposure<br>Cognitive problem solving<br>10 sessions, 90-minute weekly sessions<br>Delivered by doctoral level psychologist                  | Mean age: 10.81 ( range: 7-17)<br>Male: 39.6%<br>Caucasian: 94.4%, Other: 5.6%<br>ADHD: 10%, Depression, 13%, OCD: 3%<br>Treatment naïve: 22.2%                                                            |                                                  |
|                             |                                                            |                                | Control (N=62)                               | Waitlisting or no treatment                                                                                                                                              | Mean age: 11.66 ( range: 7-17)<br>Male: 41.9%<br>Caucasian: 84%, Other: 16%<br>Depression: 24%, OCD: 8%<br>Treatment naïve: 70.9                                                                           |                                                  |
| Hayward, 2000 <sup>44</sup> | United States RCT<br>Mental Health Clinic                  | SoP                            | Child CBT- (parents included < 20%) (N=12)   | Generic CBT<br>Group based<br>Exposure<br>Cognitive problem solving<br>16 90-minute weekly sessions<br>Delivered by 2 doctoral level psychologist and 2 students/trainee | Mean age: 15.8<br>Low income: n= 29<br>Medium income: n= 23<br>High income: n= 11                                                                                                                          | 52                                               |
|                             |                                                            |                                | Control (N=3)                                | Waitlisting or no treatment                                                                                                                                              |                                                                                                                                                                                                            |                                                  |

| Author, Year               | Study country, study design, type of study, study settings | Type of anxiety/Severity (CGI) | Intervention and comparisons (n of patients)        | Characteristics of interventions (psychotherapy: components, delivery model)/pharm: drug intensity, duration (weeks))                                                                                              | Patient characteristics mean age (range) , male (%), race/ethnicity, comorbidity, household income, parent education, family dysfunction/stressor, treatment sequence, insurance, history of maltreatment)                                                                                                                                      | Follow up after the end of intervention (weeks ) |
|----------------------------|------------------------------------------------------------|--------------------------------|-----------------------------------------------------|--------------------------------------------------------------------------------------------------------------------------------------------------------------------------------------------------------------------|-------------------------------------------------------------------------------------------------------------------------------------------------------------------------------------------------------------------------------------------------------------------------------------------------------------------------------------------------|--------------------------------------------------|
| Holmes, 2014 <sup>45</sup> | Australia<br>RCT<br>Mental Health Clinic                   | GAD, SAD, SoP, SP              | Child CBT plus separate parent intervention (N= 20) | No worries<br>Group based<br>Relaxation<br>Cognitive problem solving<br>10 weekly 90-min child sessions plus two boosters, and 7 90-minute parent sessions with 2 boosters<br>Delivered by Masters level clinician | Mean age: 9.65 (range: 7-12)<br>Males: 25%<br>Caucasian: 100%<br>Low income (<\$29,875): 0%<br>Medium income (\$30,622-\$59750): 10%<br>High income (>\$60,497): 90%<br>Less than high school or high school graduate (parent): 35%<br>Some college (parent): 25%<br>College graduate (parent): 40%<br>ADHD: 45%<br>Depression: 25%<br>ODD: 30% | 13                                               |
|                            |                                                            |                                | Control (N=22)                                      | Waitlisting or no treatment                                                                                                                                                                                        | Mean age: 9.64 (range: 7-12)<br>Males: 40.9%<br>Caucasian: 95.5%<br>African American: 4.5%<br>Low income (<\$29,875): 9.1%<br>Medium income (\$30,622-\$59750): 13.6%<br>High income (>\$60,497): 77.3%<br>Less than high school or                                                                                                             |                                                  |

| Author, Year                         | Study country, study design, type of study, study settings | Type of anxiety/Severity (CGI)         | Intervention and comparisons (n of patients) | Characteristics of interventions (psychotherapy: components, delivery model)/pharm: drug intensity, duration (weeks))                                            | Patient characteristics mean age (range) , male (%), race/ethnicity, comorbidity, household income, parent education, family dysfunction/stressor, treatment sequence, insurance, history of maltreatment)                                | Follow up after the end of intervention (weeks ) |
|--------------------------------------|------------------------------------------------------------|----------------------------------------|----------------------------------------------|------------------------------------------------------------------------------------------------------------------------------------------------------------------|-------------------------------------------------------------------------------------------------------------------------------------------------------------------------------------------------------------------------------------------|--------------------------------------------------|
|                                      |                                                            |                                        |                                              |                                                                                                                                                                  | high school graduate (parent): 34%<br>Some college (parent): 31.8%<br>College graduate (parent): 31.8%<br>ADHD: 45%<br>Depression: 25%<br>ODD: 30%                                                                                        |                                                  |
| Hirshfeld-Becker, 2010 <sup>46</sup> | United States RCT Outpatient                               | GAD, PD with agoraphobia, SAD, SoP, SP | Child and parent together CBT (N=34)         | Being Brave<br>Individual based<br>Exposure<br>Relaxation<br>Cognitive problem solving<br>Up to 20 weekly sessions<br>Delivered by psychologist, student/trainee | Mean age: 5.4 (range: 4-7)<br>Males:50%<br>Caucasian: 79%<br>Hispanic:3%<br>Asian: 8.8%<br>Other: 8.8%<br>Less than high school or high school graduate (parent): 6.55%<br>Some college (parent): 15.5%<br>College graduate (parent): 78% | 12                                               |
|                                      |                                                            |                                        | Control (N=30)                               | Waitlisting or no treatment                                                                                                                                      | Mean age: 6.2 (range: 4-7)<br>Males: 43%<br>Caucasian: 80%<br>Hispanic:3.3%<br>Asian: 6.6%<br>Other: 10%<br>Less than high school or high school graduate                                                                                 |                                                  |

| Author, Year                | Study country, study design, type of study, study settings | Type of anxiety/Severity (CGI) | Intervention and comparisons (n of patients) | Characteristics of interventions (psychotherapy: components, delivery model)/pharm: drug intensity, duration (weeks))                                                                                     | Patient characteristics mean age (range) , male (%), race/ethnicity, comorbidity, household income, parent education, family dysfunction/stressor, treatment sequence, insurance, history of maltreatment) | Follow up after the end of intervention (weeks ) |
|-----------------------------|------------------------------------------------------------|--------------------------------|----------------------------------------------|-----------------------------------------------------------------------------------------------------------------------------------------------------------------------------------------------------------|------------------------------------------------------------------------------------------------------------------------------------------------------------------------------------------------------------|--------------------------------------------------|
|                             |                                                            |                                |                                              |                                                                                                                                                                                                           | (parent): 6.55%<br>Some college (parent): 15.5%<br>College graduate (parent): 78%                                                                                                                          |                                                  |
| Kendall, 1995 <sup>47</sup> | United States<br>RCT<br>Mental Health Clinic               | GAD,SAD,<br>SoP, SP            | Child CBT (N=27)                             | Coping Cat<br>Child CBT- (parents included < 20%)<br>Individual based<br>Exposure<br>Relaxation<br>Cognitive problem solving<br>17 50-60-minute weekly sessions<br>Delivered by student                   | Age range: 9-13 years<br>Male: 51.8%<br>Caucasian: 78%, African American: 22%                                                                                                                              | 52                                               |
|                             |                                                            |                                | Control (N=20)                               | Waitlisting or no treatment                                                                                                                                                                               | Age range: 9-13 years<br>Male: 60%<br>Caucasian: 80%, African American: 20%                                                                                                                                |                                                  |
| Kendall, 1997 <sup>48</sup> | United States<br>RCT<br>Mental Health Clinic               | GAD, SAD, SP,<br>SoP           | Child CBT (N=60)                             | Coping Cat<br>Child CBT- (parents included < 20%)<br>Individual based<br>Exposure<br>Relaxation<br>Cognitive problem solving<br>16 60-minute weekly sessions<br>Delivered by doctoral level psychologists | Age range: 9 – 13 years<br>Low income: 32%<br>Medium income 31%<br>High income: 28%<br>Male: 58.3%<br>Caucasian: 86.6%<br>African American: 6.6<br>Hispanic: 1.6<br>Asian: 1.6                             | 52                                               |
|                             |                                                            |                                | Control                                      | Waitlisting or no treatment                                                                                                                                                                               | Age range: 9 – 13 years                                                                                                                                                                                    |                                                  |

| Author, Year                | Study country, study design, type of study, study settings | Type of anxiety/Severity (CGI) | Intervention and comparisons (n of patients) | Characteristics of interventions (psychotherapy: components, delivery model)/pharm: drug intensity, duration (weeks))                                                                                                         | Patient characteristics mean age (range) , male (%), race/ethnicity, comorbidity, household income, parent education, family dysfunction/stressor, treatment sequence, insurance, history of maltreatment) | Follow up after the end of intervention (weeks ) |
|-----------------------------|------------------------------------------------------------|--------------------------------|----------------------------------------------|-------------------------------------------------------------------------------------------------------------------------------------------------------------------------------------------------------------------------------|------------------------------------------------------------------------------------------------------------------------------------------------------------------------------------------------------------|--------------------------------------------------|
|                             |                                                            |                                | (N=34)                                       |                                                                                                                                                                                                                               | Low income: 32%<br>Medium income 31%<br>High income: 28%<br>Male: 67.6%<br>Caucasian: 82.35%<br>African American: 2.9%<br>Hispanic: 2.9%<br>Asians: 5.8<br>Others: 5.8%                                    |                                                  |
| Lee, 2016 <sup>49</sup>     | United States<br>RCT<br>Mental Health Clinic               | GAD,SAD, SoP                   | Other Therapy (N=37)                         | Friends<br>Combines CBT only and CBT plus parenting<br>Group based<br>Exposure<br>Relaxation<br>Cognitive problem solving<br>9 sessions, plus 2 booster sessions;<br>half of group also received 9 concurrent parent sessions | Caucasian: 97%                                                                                                                                                                                             | 156                                              |
|                             |                                                            |                                | Control (N=24)                               | Waitlisting or no treatment                                                                                                                                                                                                   |                                                                                                                                                                                                            |                                                  |
| Leutgeb, 2011 <sup>50</sup> | Austria<br>RCT<br>Mental Health Clinic                     | SP                             | Child CBT (N=16)                             | OST<br>Child CBT- (parents included < 20%)<br>Individual based<br>Exposure<br>Relaxation<br>Cognitive problem solving<br>1 session, up to 4 hours                                                                             | Mean age: 11.44 (range: 8-14)                                                                                                                                                                              | 0                                                |
|                             |                                                            |                                | Control                                      | Waitlisting or no treatment                                                                                                                                                                                                   |                                                                                                                                                                                                            |                                                  |



| Author, Year                     | Study country, study design, type of study, study settings | Type of anxiety/Severity (CGI)        | Intervention and comparisons (n of patients) | Characteristics of interventions (psychotherapy: components, delivery model)/pharm: drug intensity, duration (weeks))                                                                                                                                                                                                                                                                                                                            | Patient characteristics mean age (range) , male (%), race/ethnicity, comorbidity, household income, parent education, family dysfunction/stressor, treatment sequence, insurance, history of maltreatment) | Follow up after the end of intervention (weeks ) |
|----------------------------------|------------------------------------------------------------|---------------------------------------|----------------------------------------------|--------------------------------------------------------------------------------------------------------------------------------------------------------------------------------------------------------------------------------------------------------------------------------------------------------------------------------------------------------------------------------------------------------------------------------------------------|------------------------------------------------------------------------------------------------------------------------------------------------------------------------------------------------------------|--------------------------------------------------|
|                                  |                                                            |                                       | (N=14)                                       |                                                                                                                                                                                                                                                                                                                                                                                                                                                  | 14)                                                                                                                                                                                                        |                                                  |
| Masia-Warner, 2005 <sup>51</sup> | United States RCT School                                   | GAD, PD with agoraphobia, SoP         | Child CBT (N=21)                             | Skills for Social and Academic Success<br>Child CBT- (parents included < 20%)<br>Group based<br>Exposure<br>Cognitive problem solving<br>School settings for about 3 months.<br>12 40-minutes weekly session, 2 brief individual meetings (15 minutes), 2 group boosters; 4 weekend social events (90 minutes); 2 Parents groups (45 minutes); 2 teacher groups (30 minutes)<br>Delivered by a doctoral level psychologist and a student/trainee | Mean age: 15 ( Range 13 - 17)<br>Male: 19%<br>Caucasian: 76.19%<br>African Americans: 9.5%                                                                                                                 | NR                                               |
|                                  |                                                            |                                       | Control (N=21)                               | Waitlisting or no treatment                                                                                                                                                                                                                                                                                                                                                                                                                      | Mean age: 14.5 ( Range 13- 17)<br>Male: 23.8%<br>Caucasian: 61.9%<br>African Americans: 4.7%<br>Hispanics: 4.7%<br>Asians: 4.7%<br>Others: 4.7%                                                            |                                                  |
| McConachie, 2014 <sup>52</sup>   | United Kingdom RCT Mental Health                           | GAD, PD with agoraphobia, SAD SoP, SP | Child CBT plus separate parent               | Exploring feelings<br>Group based<br>7 2-hours sessions with separate parent and child groups                                                                                                                                                                                                                                                                                                                                                    | Mean age: 11.7 (range: 9- 13)<br>Males: 88%<br>College graduate (parent):                                                                                                                                  | 39                                               |

| Author, Year                      | Study country, study design, type of study, study settings | Type of anxiety/Severity (CGI) | Intervention and comparisons (n of patients) | Characteristics of interventions (psychotherapy: components, delivery model)/pharm: drug intensity, duration (weeks))                                                                                     | Patient characteristics mean age (range) , male (%), race/ethnicity, comorbidity, household income, parent education, family dysfunction/stressor, treatment sequence, insurance, history of maltreatment)                                   | Follow up after the end of intervention (weeks ) |
|-----------------------------------|------------------------------------------------------------|--------------------------------|----------------------------------------------|-----------------------------------------------------------------------------------------------------------------------------------------------------------------------------------------------------------|----------------------------------------------------------------------------------------------------------------------------------------------------------------------------------------------------------------------------------------------|--------------------------------------------------|
|                                   | Clinic                                                     |                                | intervention (N=17)                          | Delivered by Psychologist                                                                                                                                                                                 | 47%<br>ADHD: 30%<br>Depression: 12%<br>Autism: 100%<br>OCD: 18%<br>ODD:6%                                                                                                                                                                    |                                                  |
|                                   |                                                            |                                | Control (N=15)                               | Waitlisting or no treatment                                                                                                                                                                               | Mean age: 11.8 (range: 9-13)<br>Males: 87%<br>College graduate (parent): 80%<br>ADHD: 33%<br>Autism: 100%<br>OCD: 7%<br>ODD:7%                                                                                                               |                                                  |
| McNally Keehn, 2013 <sup>53</sup> | United States RCT Mental Health Clinic                     | GAD, SAD, SoP, SP              | Child CBT (N=12)                             | Coping Cat<br>Child CBT- (parents included < 20%)<br>Individual based<br>Exposure<br>Relaxation<br>Cognitive problem solving<br>Delivered by psychologist<br>16 sessions, 60 to 90-minute weekly sessions | Mean age: 11.65 (range: 8-14)<br>Males: 100%<br>Caucasian: 66%<br>Hispanic: 17%<br>Others: 17%<br>Less than high school or high school graduate (parent): 33%<br>College graduate (parent): 67%<br>Depression: 8%<br>Autism: 100%<br>OCD:17% | 8                                                |

| Author, Year                | Study country, study design, type of study, study settings | Type of anxiety/Severity (CGI) | Intervention and comparisons (n of patients) | Characteristics of interventions (psychotherapy: components, delivery model)/pharm: drug intensity, duration (weeks))                                                                                 | Patient characteristics mean age (range) , male (%), race/ethnicity, comorbidity, household income, parent education, family dysfunction/stressor, treatment sequence, insurance, history of maltreatment)                             | Follow up after the end of intervention (weeks ) |
|-----------------------------|------------------------------------------------------------|--------------------------------|----------------------------------------------|-------------------------------------------------------------------------------------------------------------------------------------------------------------------------------------------------------|----------------------------------------------------------------------------------------------------------------------------------------------------------------------------------------------------------------------------------------|--------------------------------------------------|
|                             |                                                            |                                |                                              |                                                                                                                                                                                                       | ADHD: 67%<br>ODD: 33%                                                                                                                                                                                                                  |                                                  |
|                             |                                                            |                                | Control (N=10)                               | Waitlisting or no treatment                                                                                                                                                                           | Mean age; 11.02 (range: 8-14)<br>Males: 90%<br>Caucasian: 40%<br>Hispanic: 10%<br>Others: 17%<br>Less than high school or high school graduate (parent): 10%<br>College graduate (parent): 90%<br>Autism: 90%<br>ADHD: 80%<br>ODD: 50% |                                                  |
| Melfsen, 2011 <sup>54</sup> | Germany<br>RCT<br>Mental Health Clinic                     | SoP                            | Child CBT (N=21)                             | Generic CBT<br>Child CBT- (parents included < 20%)<br>Individual based<br>Exposure<br>Cognitive problem solving<br>20 50-minute weekly sessions and 4 parent sessions<br>Delivered by student/trainee | Mean age: 10.6 (range 8-14)<br>Males: 62%<br>Caucasian: 100%<br>Sleeping disorder: 9.5%<br>ODD: 4.7%<br>Tic disorder: 4.7%                                                                                                             | 43                                               |
|                             |                                                            |                                | Control (N=23)                               | Waitlisting or no treatment                                                                                                                                                                           | Mean age: 10.76 (range 8-14)<br>Males: 43%<br>Caucasian: 100%                                                                                                                                                                          |                                                  |

| Author, Year                    | Study country, study design, type of study, study settings | Type of anxiety/Severity (CGI) | Intervention and comparisons (n of patients)       | Characteristics of interventions (psychotherapy: components, delivery model)/pharm: drug intensity, duration (weeks))                                                                                           | Patient characteristics mean age (range) , male (%), race/ethnicity, comorbidity, household income, parent education, family dysfunction/stressor, treatment sequence, insurance, history of maltreatment) | Follow up after the end of intervention (weeks ) |
|---------------------------------|------------------------------------------------------------|--------------------------------|----------------------------------------------------|-----------------------------------------------------------------------------------------------------------------------------------------------------------------------------------------------------------------|------------------------------------------------------------------------------------------------------------------------------------------------------------------------------------------------------------|--------------------------------------------------|
|                                 |                                                            |                                |                                                    |                                                                                                                                                                                                                 | Affective disorder: 4.3%<br>Sleeping disorder: 4.3%<br>ADHD: 4.3%<br>ODD: 4.3%<br>Elimination disorder: 8.6%                                                                                               |                                                  |
| Mendlowitz , 1999 <sup>55</sup> | Canada<br>RCT<br>Outpatient                                |                                | Child CBT (N=23)                                   | Coping Bear<br>Child CBT- (parents included < 20%)<br>Group based<br>Relaxation, Cognitive problem solving<br>12 1.5-hour weekly sessions<br>Delivered by 3 psychologists, 1 student/trainee, 1 youth worker    | Mean age: 9.5 (Range 7-12)<br>Male: 28.4%                                                                                                                                                                  | NR                                               |
|                                 |                                                            |                                | Parent only intervention (N=21)                    | Generic CBT<br>Group based<br>12 1.5-hour weekly sessions<br>Delivered by doctoral level psychologist, and student/trainee                                                                                      |                                                                                                                                                                                                            |                                                  |
|                                 |                                                            |                                | Child CBT plus separate parent intervention (N=18) | Coping bear<br>Group based<br>Relaxation<br>Cognitive problem solving<br>12 1.5-hour weekly sessions (one for kids, one for parents)<br>Delivered by doctoral level psychologist, student/trainee, youth worker |                                                                                                                                                                                                            |                                                  |
|                                 |                                                            |                                | Control (N=40)                                     | Waitlisting or no treatment                                                                                                                                                                                     |                                                                                                                                                                                                            |                                                  |

| Author, Year                  | Study country, study design, type of study, study settings | Type of anxiety/Severity (CGI) | Intervention and comparisons (n of patients) | Characteristics of interventions (psychotherapy: components, delivery model)/pharm: drug intensity, duration (weeks))                                                            | Patient characteristics mean age (range) , male (%), race/ethnicity, comorbidity, household income, parent education, family dysfunction/stressor, treatment sequence, insurance, history of maltreatment) | Follow up after the end of intervention (weeks ) |
|-------------------------------|------------------------------------------------------------|--------------------------------|----------------------------------------------|----------------------------------------------------------------------------------------------------------------------------------------------------------------------------------|------------------------------------------------------------------------------------------------------------------------------------------------------------------------------------------------------------|--------------------------------------------------|
| Menzies, 1993 <sup>56</sup>   | Australia<br>RCT<br>Outpatient                             | SP                             | Child CBT (N=13)                             | In vivo exposure plus vicarious exposure<br>Child CBT- (parents included < 20%)<br>Individual based<br>Delivered by student therapist<br>3 15-minute weekly session              | Mean age: 5.5 (range:3-8)<br>Male: 50.7%<br>Caucasian: 96%,<br>Hispanic:4%<br>Depression: 10%<br>Treatment non responder: 100%                                                                             | 12                                               |
|                               |                                                            |                                | Control (N=13)                               | Attention Control or Treatment as Usual<br>Only vicarious exposure<br>3 30-minute weekly session<br>Delivered by student therapist                                               |                                                                                                                                                                                                            |                                                  |
|                               |                                                            |                                | Child CBT (N=13)                             | In vivo exposure<br>Child CBT- (parents included < 20%)<br>Individual based<br>Exposure 3 30-minute weekly session<br>Delivered by student                                       |                                                                                                                                                                                                            |                                                  |
|                               |                                                            |                                | Control (N=12)                               | Waitlisting or no treatment Only assessment                                                                                                                                      |                                                                                                                                                                                                            |                                                  |
| Miller, 1972 <sup>57,58</sup> | United States<br>RCT<br>Outpatient                         | SP                             | Child CBT (N=NR)                             | Total number of patients: 67<br>Reciprocal inhibition: Individual-based relaxation exposure<br>Delivered by doctoral psychologist<br>60 min session 3 times per week for 8 weeks | Mean age: 10.8 ( range: 6-14)<br>Male: 55%<br>Caucasian: 95.5%, African American: 4.5%<br>Socioeconomic status:<br>Lower: 7%<br>Middle:75%<br>High: 8%                                                     | 104                                              |
|                               |                                                            |                                | Other therapy (N=NR)                         | Individual, Play psychotherapy directed toward inner experiences<br>60 min session 3 times per week                                                                              |                                                                                                                                                                                                            |                                                  |

| Author, Year                 | Study country, study design, type of study, study settings | Type of anxiety/Severity (CGI)        | Intervention and comparisons (n of patients) | Characteristics of interventions (psychotherapy: components, delivery model)/pharm: drug intensity, duration (weeks))                              | Patient characteristics mean age (range) , male (%), race/ethnicity, comorbidity, household income, parent education, family dysfunction/stressor, treatment sequence, insurance, history of maltreatment) | Follow up after the end of intervention (weeks ) |
|------------------------------|------------------------------------------------------------|---------------------------------------|----------------------------------------------|----------------------------------------------------------------------------------------------------------------------------------------------------|------------------------------------------------------------------------------------------------------------------------------------------------------------------------------------------------------------|--------------------------------------------------|
|                              |                                                            |                                       |                                              | for 8 weeks                                                                                                                                        |                                                                                                                                                                                                            |                                                  |
|                              |                                                            |                                       | Control (N=NR)                               | Waitlisting or no treatment                                                                                                                        |                                                                                                                                                                                                            |                                                  |
| Nauta, 2003 <sup>59</sup>    | Netherlands RCT Mental Health                              | GAD, PD without agoraphobia, SoP, SAD | Child CBT (N=37)                             | Coping Cat –Dutch Exposure, Cognitive Problem Solving Individual based Delivered by doctoral level psychologist student/trainee 12, 60min sessions | Age mean (years): 11 Male: 51.3%                                                                                                                                                                           | 12                                               |
|                              |                                                            |                                       | Control (N=39)                               | Waitlisting or no treatment                                                                                                                        |                                                                                                                                                                                                            |                                                  |
| Olivares, 2002 <sup>60</sup> | Spain Non-Randomized comparative studies School            | GAD, PD with agoraphobia, SoP,SP      | Child CBT (N=14)                             | SET-C Spanish Child CBT- (parents included < 20%) Exposure 29 treatment sessions over a period of 17 weeks, generally twice weekly                 | mean age: 15.57 (range: 15-17) Male: 28.5% Depression: 35.7%, OCD: 7%, Substance abuse : 7%, PTSD: 7%, avoidant personality disorder: 100%, selective mutism: 7%                                           | 52                                               |
|                              |                                                            |                                       | Child CBT (N=15)                             | Group based Child CBT- (parents included < 20%) Exposure Cognitive problem solving 16 90-minute sessions over 14 weeks                             | mean age: 16.07 (range: 15-17) Male: 35.7% Depression: 60%, OCD: 6%, Substance abuse : 6%, PTSD: 6%, avoidant personality disorder: 94%, selective mutism: 12%                                             |                                                  |
|                              |                                                            |                                       | Child CBT (N=15)                             | IAFS Child CBT- (parents included <                                                                                                                | mean age: 15.87 (range: 15-17)                                                                                                                                                                             |                                                  |

| Author, Year                 | Study country, study design, type of study, study settings | Type of anxiety/Severity (CGI) | Intervention and comparisons (n of patients) | Characteristics of interventions (psychotherapy: components, delivery model)/pharm: drug intensity, duration (weeks))                                                        | Patient characteristics mean age (range) , male (%), race/ethnicity, comorbidity, household income, parent education, family dysfunction/stressor, treatment sequence, insurance, history of maltreatment) | Follow up after the end of intervention (weeks ) |
|------------------------------|------------------------------------------------------------|--------------------------------|----------------------------------------------|------------------------------------------------------------------------------------------------------------------------------------------------------------------------------|------------------------------------------------------------------------------------------------------------------------------------------------------------------------------------------------------------|--------------------------------------------------|
|                              |                                                            |                                |                                              | 20%)<br>Exposure Cognitive problem solving<br>12 90-minute weekly group sessions, and optional individual sessions                                                           | Male: 26.6%<br>Depression: 40%, OCD: 6%,<br>Substance abuse : 6%,<br>PTSD: 6%, avoidant personality disorder: 100%,<br>selective mutism: 6%                                                                |                                                  |
|                              |                                                            |                                | Control (N=15)                               | Waitlisting or no treatment                                                                                                                                                  | mean age: 15.87 (range: 15-17)<br>Male: 35.7%<br>Depression: 46%, OCD: 6%,<br>Substance abuse : 12%,<br>PTSD: 6%, avoidant personality disorder: 100%,<br>selective mutism: 12%                            |                                                  |
| Olivares, 2014 <sup>61</sup> | Spain<br>RCT<br>Mental Health Clinic                       | SoP                            | Child CBT (N=38)                             | IAFS<br>Child CBT- (parents included < 20%)<br>Delivered by experienced psychologist<br>Group based<br>Exposure<br>Cognitive problem solving<br>12 90-minute weekly sessions | Mean age: 15.58 (SD: 0.76)<br>Males: 36.81%                                                                                                                                                                | 52                                               |
|                              |                                                            |                                | Child CBT (N=37)                             | IAFS<br>Child CBT- (parents included < 20%)<br>Delivered by inexperienced psychologist<br>Group based<br>Exposure                                                            | Mean age: 15.30 (SD: 0.81)<br>Males: 29.74%                                                                                                                                                                |                                                  |

| Author, Year                  | Study country, study design, type of study, study settings               | Type of anxiety/Severity (CGI) | Intervention and comparisons (n of patients) | Characteristics of interventions (psychotherapy: components, delivery model)/pharm: drug intensity, duration (weeks))                                                                 | Patient characteristics mean age (range) , male (%), race/ethnicity, comorbidity, household income, parent education, family dysfunction/stressor, treatment sequence, insurance, history of maltreatment) | Follow up after the end of intervention (weeks ) |
|-------------------------------|--------------------------------------------------------------------------|--------------------------------|----------------------------------------------|---------------------------------------------------------------------------------------------------------------------------------------------------------------------------------------|------------------------------------------------------------------------------------------------------------------------------------------------------------------------------------------------------------|--------------------------------------------------|
|                               |                                                                          |                                |                                              | Cognitive problem solving<br>12 90-minute weekly sessions                                                                                                                             |                                                                                                                                                                                                            |                                                  |
|                               |                                                                          |                                | Control (N=35)                               | Waitlisting or no treatment                                                                                                                                                           | Mean age: 15.23 (SD: 1.26)<br>Males: 37.1%                                                                                                                                                                 |                                                  |
| Ollendick, 2009 <sup>62</sup> | United States and Sweden<br>RCT<br>Outpatient<br>Mental Health<br>Clinic | SP, SoP, SAD,<br>GAD           | Child CBT (N=85)                             | OST<br>Child CBT- (parents included < 20%)<br>One Session Treatment<br>Individual based<br>Exposure<br>1 session of 3 hours<br>Delivered by master level clinicians                   | Caucasian: 90%,<br>African American: 2.5%<br>Hispanic:: 2%<br>Other: 4.5%<br>Age range 7 -16 years<br>Male: 45.8%                                                                                          | 36                                               |
|                               |                                                                          |                                | Control (N=70)                               | Attention Control or Treatment as Usual<br>Education Support Treatment<br>1 session of 3 hours<br>Delivered by master level clinicians                                                | Caucasian: 90%,<br>African American: 2.5%<br>Hispanic:: 2%<br>Other: 4.5%<br>Range 7 – 16<br>Male: 44.2%                                                                                                   |                                                  |
|                               |                                                                          |                                | Control (N= 41)                              | Waitlisting or no treatment                                                                                                                                                           | Age range 7 -16 years<br>Male: 46.3%                                                                                                                                                                       |                                                  |
| Ost, 2001 <sup>63</sup>       | Sweden<br>RCT<br>Mental Health<br>Clinic                                 | GAD,SAD,<br>SoP, SP            | Child CBT (N=21)                             | OST<br>Child CBT- (parents included < 20%)<br>One session treatment - Child alone<br>Individual based<br>Exposure 1 session of 3 hours<br>Delivered by doctoral level<br>Psychologist | mean age: 11.7 (range: 7-17)<br>Male: 33                                                                                                                                                                   | 52                                               |
|                               |                                                                          |                                | Child and parent                             | OST<br>One session exposure - Parent                                                                                                                                                  | mean age: 11.7 (range: 7-17)                                                                                                                                                                               |                                                  |



| Author, Year              | Study country, study design, type of study, study settings | Type of anxiety/Severity (CGI)                     | Intervention and comparisons (n of patients)                                                                                                              | Characteristics of interventions (psychotherapy: components, delivery model)/pharm: drug intensity, duration (weeks))                                 | Patient characteristics mean age (range) , male (%), race/ethnicity, comorbidity, household income, parent education, family dysfunction/stressor, treatment sequence, insurance, history of maltreatment) | Follow up after the end of intervention (weeks ) |
|---------------------------|------------------------------------------------------------|----------------------------------------------------|-----------------------------------------------------------------------------------------------------------------------------------------------------------|-------------------------------------------------------------------------------------------------------------------------------------------------------|------------------------------------------------------------------------------------------------------------------------------------------------------------------------------------------------------------|--------------------------------------------------|
|                           |                                                            |                                                    | together CBT (N=20)                                                                                                                                       | present Individual based Exposure 1 session of 3 hours Delivered by doctoral level Psychologist                                                       | Male: 45%                                                                                                                                                                                                  |                                                  |
|                           |                                                            |                                                    | Control (N=19)                                                                                                                                            | Waitlisting or no treatment                                                                                                                           | mean age: 11.7 (range: 7-17)<br>Male: 36%                                                                                                                                                                  |                                                  |
| Ost, 2015 <sup>64</sup>   | Sweden RCT Mental Health Clinic                            | GAD, PD, SAD, SP                                   | Child CBT (N=16)                                                                                                                                          | SET-C Child CBT- (parents included < 20%) Exposure 12 individual weekly sessions plus 12 social skills group weekly session Delivered by Psychologist | Mean age: 11.6 (range: 8-14)<br>Depression: 15%<br>OCD: 5%<br>ODD: 2%<br>Neurodevelopmental Disorder:9%                                                                                                    | 52                                               |
|                           |                                                            | Child CBT plus separate parent intervention (N=16) | SET-C Exposure 12 individual weekly sessions plus 12 social skills group weekly session; plus 8 90-minute parent group sessions Delivered by Psychologist |                                                                                                                                                       |                                                                                                                                                                                                            |                                                  |
|                           |                                                            | Control (N=23)                                     | Waitlisting or no treatment                                                                                                                               |                                                                                                                                                       |                                                                                                                                                                                                            |                                                  |
| Rapee, 2000 <sup>65</sup> | Australia non randomized                                   | NR                                                 | Child and parent together                                                                                                                                 | Other: Family CBT Group based Exposure                                                                                                                | Mean age: 10.46 (range: 7-16)<br>Males: 41%                                                                                                                                                                | 52 (only for                                     |

| Author, Year               | Study country, study design, type of study, study settings | Type of anxiety/Severity (CGI)                        | Intervention and comparisons (n of patients) | Characteristics of interventions (psychotherapy: components, delivery model)/pharm: drug intensity, duration (weeks))                         | Patient characteristics mean age (range) , male (%), race/ethnicity, comorbidity, household income, parent education, family dysfunction/stressor, treatment sequence, insurance, history of maltreatment) | Follow up after the end of intervention (weeks ) |
|----------------------------|------------------------------------------------------------|-------------------------------------------------------|----------------------------------------------|-----------------------------------------------------------------------------------------------------------------------------------------------|------------------------------------------------------------------------------------------------------------------------------------------------------------------------------------------------------------|--------------------------------------------------|
|                            | comparative Outpatient                                     |                                                       | CBT (N=95)                                   | Cognitive problem solving<br>9, 90 minute treatment sessions, over 11 weeks<br>Delivered by student/trainee                                   |                                                                                                                                                                                                            | CBT arm)                                         |
|                            |                                                            |                                                       | Control (N=15)                               | Waitlisting or no treatment                                                                                                                   | Mean age: 11.1 (range: 7-16)<br>Males: 33.3%                                                                                                                                                               |                                                  |
| Rapee, 2006 <sup>66</sup>  | Australia<br>RCT<br>Mental Health Clinic                   | GAD, PD (agoraphobia is not specified), SAD, SP, SoP. | Child and parent together<br>CBT (N=90)      | Cool Kids<br>Group based<br>Exposure<br>Cognitive problem solving<br>9 2-hour sessions over 12 weeks<br>Delivered by student trainee.         | Mean age: 9.475 (Range: 6 - 12)<br>Male: 66.6%<br>Low income: n= 26 (<\$30,000)                                                                                                                            | 36                                               |
|                            |                                                            |                                                       | Distance Therapy (N=90)                      | Other: Bibliotherapy<br>Individual based<br>Exposure<br>Relaxation<br>Cognitive problem solving<br>Treatment duration is 12 weeks at own pace | Mean age: 9.558 (Range: 6 – 12)<br>Male: 64.44%<br>Low income: n= 9 (<\$30,000)                                                                                                                            |                                                  |
|                            |                                                            |                                                       | Control (N=87)                               | Waitlisting or no treatment                                                                                                                   | Mean age: 9.5 (Range: 6 – 12)<br>Male: 48.2%<br>Low income: n= 15(<\$30,000)                                                                                                                               |                                                  |
| Reaven, 2009 <sup>67</sup> | United States<br>RCT<br>Outpatient                         | GAD,SAD, SoP                                          | Child and parent together<br>CBT (N=10)      | Generic CBT<br>Exposure<br>Relaxation<br>Cognitive problem solving<br>12 1.5-hour weekly sessions                                             | Mean age: 11 ( range: 8-14)<br>Male: 70%<br>Caucasian: 80%, African American:10%, Hispanic: 10%                                                                                                            | 0                                                |

| Author, Year               | Study country, study design, type of study, study settings | Type of anxiety/Severity (CGI) | Intervention and comparisons (n of patients) | Characteristics of interventions (psychotherapy: components, delivery model)/pharm: drug intensity, duration (weeks))                                             | Patient characteristics mean age (range) , male (%), race/ethnicity, comorbidity, household income, parent education, family dysfunction/stressor, treatment sequence, insurance, history of maltreatment) | Follow up after the end of intervention (weeks ) |
|----------------------------|------------------------------------------------------------|--------------------------------|----------------------------------------------|-------------------------------------------------------------------------------------------------------------------------------------------------------------------|------------------------------------------------------------------------------------------------------------------------------------------------------------------------------------------------------------|--------------------------------------------------|
|                            |                                                            |                                |                                              | (included large group time, separate parent and child group meetings, and parent-child dyads).<br>Delivered by Doctoral level Psychologist                        | Parent education level:<br>Some college:30%, collage grade: 40%<br>Autism: 100%                                                                                                                            |                                                  |
|                            |                                                            |                                | Control (N=23)                               | Waitlisting or no treatment                                                                                                                                       | Mean age: 11 ( range: 8-14)<br>Male: 83%<br>Caucasian: 83%, African American:4.5%, Hispanic: 4.5%, Other: 8<br>Some college:26%, collage grade: 35%<br>Autism: 100%                                        |                                                  |
| Ritter, 1968 <sup>68</sup> | United States<br>RCT<br>Outpatient                         | SP                             | Child CBT (N=15)                             | Other: Only contact desensitization<br>Child CBT- (parents included < 20%)<br>Group based<br>Exposure<br>2 35-minute weekly sessions<br>Delivered by psychiatrist | Age range: 5-11 years                                                                                                                                                                                      | 0                                                |
|                            |                                                            |                                | Control (N=15)                               | Attention Control or Treatment as Usual<br>Only vicarious desensitization<br>Group based<br>2 35-minute weekly sessions<br>Delivered by psychiatrist              |                                                                                                                                                                                                            |                                                  |
|                            |                                                            |                                | Control (N=14)                               | Waitlisting or no treatment                                                                                                                                       |                                                                                                                                                                                                            |                                                  |
| Rosa-Alcazar,              | Spain<br>RCT                                               | GAD, PD without                | Child CBT (N=20)                             | IAFS<br>Child CBT- (parents included <                                                                                                                            | Mean age 15 (Range 14 - 17)                                                                                                                                                                                | 52                                               |

| Author, Year                  | Study country, study design, type of study, study settings | Type of anxiety/Severity (CGI)                               | Intervention and comparisons (n of patients) | Characteristics of interventions (psychotherapy: components, delivery model)/pharm: drug intensity, duration (weeks))                                                             | Patient characteristics mean age (range) , male (%), race/ethnicity, comorbidity, household income, parent education, family dysfunction/stressor, treatment sequence, insurance, history of maltreatment) | Follow up after the end of intervention (weeks ) |
|-------------------------------|------------------------------------------------------------|--------------------------------------------------------------|----------------------------------------------|-----------------------------------------------------------------------------------------------------------------------------------------------------------------------------------|------------------------------------------------------------------------------------------------------------------------------------------------------------------------------------------------------------|--------------------------------------------------|
| 2009 <sup>69</sup>            | schools                                                    | agoraphobia, PD (agoraphobia is not specified) SP            |                                              | 20%)<br>Group based<br>Exposure<br>Cognitive problem solving<br>12 90-minute weekly sessions<br>Delivered by practicing clinician                                                 | Male:25%                                                                                                                                                                                                   |                                                  |
|                               |                                                            |                                                              | Control (N=19)                               | Attention Control or Treatment as Usual<br>Educational Treatment on anxiety and relaxation<br>12 90-minute weekly sessions                                                        | Mean age 14.94 (14- 17)<br>Male: 31.5%                                                                                                                                                                     |                                                  |
|                               |                                                            |                                                              | Control (N=18)                               | Attention Control or Treatment as Usual<br>Education as Placebo<br>12 sessions of health education                                                                                | Mean age 14.75 (14-17)<br>Male: 16.6%                                                                                                                                                                      |                                                  |
|                               |                                                            |                                                              | Control (N=20)                               | Waitlisting or no treatment                                                                                                                                                       | Mean age 14.77<br>Male: 40%                                                                                                                                                                                |                                                  |
| Rodriguez, 2005 <sup>70</sup> | Spain<br>RCT<br>high school                                | GAD, PD without agoraphobia, SP ,SoP Social anxiety disorder | Child CBT (N=17)                             | IAFS<br>Child CBT- (parents included < 20%)<br>Group based<br>Exposure<br>Cognitive problem solving<br>12 90-minute weekly sessions<br>Delivered by two experienced psychologists | Mean age: 15<br>Male: 41.17%                                                                                                                                                                               | 6                                                |
|                               |                                                            |                                                              | Control (N=17)                               | Waitlisting or no treatment                                                                                                                                                       | Mean age: 15.06<br>Male: 41.17%                                                                                                                                                                            |                                                  |
| Sanchez-Garcia,               | Spain<br>RCT                                               | SoP                                                          | Child CBT (N=NR)                             | IAFS<br>Child CBT- (parents included <                                                                                                                                            | Total number of patients: 45<br>Mean age: 12                                                                                                                                                               | 26                                               |

| Author, Year                       | Study country, study design, type of study, study settings | Type of anxiety/Severity (CGI) | Intervention and comparisons (n of patients) | Characteristics of interventions (psychotherapy: components, delivery model)/pharm: drug intensity, duration (weeks))                                                    | Patient characteristics mean age (range) , male (%), race/ethnicity, comorbidity, household income, parent education, family dysfunction/stressor, treatment sequence, insurance, history of maltreatment) | Follow up after the end of intervention (weeks ) |
|------------------------------------|------------------------------------------------------------|--------------------------------|----------------------------------------------|--------------------------------------------------------------------------------------------------------------------------------------------------------------------------|------------------------------------------------------------------------------------------------------------------------------------------------------------------------------------------------------------|--------------------------------------------------|
| 2009 <sup>71</sup>                 | Schools                                                    |                                |                                              | 20%)<br>Group based<br>Exposure<br>Cognitive problem solving<br>12 90-minute weekly sessions                                                                             | Male: 24.4%                                                                                                                                                                                                |                                                  |
|                                    |                                                            |                                | Control (N=NR)                               | Waitlisting or no treatment                                                                                                                                              |                                                                                                                                                                                                            |                                                  |
| Sánchez-García, 2009 <sup>72</sup> | Spain<br>RCT<br>Schools                                    | SAD                            | Child CBT (N=28)                             | IAFS<br>Child CBT- (parents included < 20%)<br>Group based<br>Exposure<br>Cognitive problem solving<br>12 90-minute weekly sessions<br>Delivered by Practicing clinician | Mean age: 11.91<br>Male: 38%<br>White: 82%                                                                                                                                                                 | 52                                               |
|                                    |                                                            |                                | Child CBT (N=29)                             | IAFS<br>Child CBT- (parents included < 20%)<br>Incomplete (IAFS without Cognitive restructuring)<br>Group based<br>Exposure<br>12 90-minute weekly sessions              |                                                                                                                                                                                                            |                                                  |
|                                    |                                                            |                                | Control (N=25)                               | Waitlisting or no treatment                                                                                                                                              |                                                                                                                                                                                                            |                                                  |
| Santucci, 2013 <sup>73</sup>       | United States<br>RCT<br>Mental Health Clinic               | SAD                            | Child CBT (N=15)                             | Generic CBT<br>Child CBT- (parents included < 20%)<br>Group based                                                                                                        | Mean age: 9.43 (range: 7-12)<br>Males: 0%<br>Caucasian: 80%                                                                                                                                                | 6                                                |

| Author, Year                  | Study country, study design, type of study, study settings | Type of anxiety/Severity (CGI) | Intervention and comparisons (n of patients) | Characteristics of interventions (psychotherapy: components, delivery model)/pharm: drug intensity, duration (weeks))                                                                                                                                                                                                                        | Patient characteristics mean age (range) , male (%), race/ethnicity, comorbidity, household income, parent education, family dysfunction/stressor, treatment sequence, insurance, history of maltreatment) | Follow up after the end of intervention (weeks ) |
|-------------------------------|------------------------------------------------------------|--------------------------------|----------------------------------------------|----------------------------------------------------------------------------------------------------------------------------------------------------------------------------------------------------------------------------------------------------------------------------------------------------------------------------------------------|------------------------------------------------------------------------------------------------------------------------------------------------------------------------------------------------------------|--------------------------------------------------|
|                               |                                                            |                                |                                              | Exposure<br>Relaxation<br>Cognitive problem solving<br>7 sessions, 3 to 5 hour daily sessions. Plus 2 additional 60 to 90 minute parent sessions<br>Delivered by psychologist and student/trainee                                                                                                                                            | Asian: 13%                                                                                                                                                                                                 |                                                  |
|                               |                                                            |                                | Control (N=14)                               | Waitlisting or no treatment                                                                                                                                                                                                                                                                                                                  | Mean age: 8.92 (range: 7-12)<br>Males: 0%<br>Caucasian: 93%<br>Asian: 7%                                                                                                                                   |                                                  |
| Schneider, 2011 <sup>74</sup> | Germany<br>RCT<br>Mental Health Clinic                     | SAD                            | Child and parent together<br>CBT (N=21)      | Other: Parent coached exposure<br>Individual based<br>Exposure<br>Cognitive problem solving<br>4 weekly 50-min sessions with the child alone and 50-min parents alone. Then 8 weekly 50-min family sessions, each split into two parts: one with parents and child together, and a second with the parents only<br>Delivered by psychologist | Mean age: 6.29 (range: 5-7)                                                                                                                                                                                | 4                                                |
|                               |                                                            |                                | Control (N=22)                               | Waitlisting or no treatment                                                                                                                                                                                                                                                                                                                  | Mean age: 6.18 (range:5-7)                                                                                                                                                                                 |                                                  |
| Shortt, 2001 <sup>75</sup>    | Australia<br>RCT<br>NR                                     | GAD, SAD, SP, SoP.             | Child CBT plus separate parent               | Friends<br>Group based, Exposure<br>Relaxation<br>Cognitive problem solving                                                                                                                                                                                                                                                                  | Male: 40.8%<br>Caucasian: 25.3%<br>Asian: 1.4%<br>Mean age: 7.83 (Range 6.5-                                                                                                                               | 52                                               |

| Author, Year                  | Study country, study design, type of study, study settings | Type of anxiety/Severity (CGI) | Intervention and comparisons (n of patients)       | Characteristics of interventions (psychotherapy: components, delivery model)/pharm: drug intensity, duration (weeks))                                                         | Patient characteristics mean age (range) , male (%), race/ethnicity, comorbidity, household income, parent education, family dysfunction/stressor, treatment sequence, insurance, history of maltreatment) | Follow up after the end of intervention (weeks ) |
|-------------------------------|------------------------------------------------------------|--------------------------------|----------------------------------------------------|-------------------------------------------------------------------------------------------------------------------------------------------------------------------------------|------------------------------------------------------------------------------------------------------------------------------------------------------------------------------------------------------------|--------------------------------------------------|
|                               |                                                            |                                | intervention (N=54)                                | 10 weekly sessions and 2 booster sessions; and 10 parent sessions (each of about 40 minutes)                                                                                  | 10)                                                                                                                                                                                                        |                                                  |
|                               |                                                            |                                | Control (N=17)                                     | Waitlisting or no treatment                                                                                                                                                   | Male: 40.8%<br>Caucasian: 25.3%<br>Asian: 1.4%<br>Mean age: 7.88 (Range 6.5-10)                                                                                                                            |                                                  |
| Silverman, 1999 <sup>76</sup> | United States RCT Mental Health Clinic                     | GAD, SoP                       | Child CBT plus separate parent intervention (N=37) | Generic CBT<br>Group based<br>Exposure<br>Cognitive problem solving<br>Unclear number of sessions, 65 minutes<br>Delivered by doctoral level psychologist and student trainee | Mean age: 10.14 (range: 6-16)<br>Males: 54%<br>Caucasian: 47%<br>Hispanic: 40%<br>Other: 4%<br>Low income (<\$15,000):27%<br>Medium income: (\$15,000-\$30,000):27%<br>High income: (>\$30,000): 34%       | 52                                               |
|                               |                                                            |                                | Control (N=19)                                     | Waitlisting or no treatment                                                                                                                                                   | Mean age: 9.63 (range: 6-16)<br>Males: 74%<br>Caucasian: 44%<br>Hispanic: 58%<br>Low income (<\$15,000):5%<br>Medium income: (\$15,000-\$30,000):32%<br>High income: (>\$30,000): 63%                      |                                                  |
| Spence,                       | Australia                                                  | GAD, SAD, SP,                  | Child CBT                                          | Generic CBT                                                                                                                                                                   | Mean age: 10.49 (range: 7-                                                                                                                                                                                 | 52                                               |

| Author, Year       | Study country, study design, type of study, study settings | Type of anxiety/Severity (CGI) | Intervention and comparisons (n of patients) | Characteristics of interventions (psychotherapy: components, delivery model)/pharm: drug intensity, duration (weeks))                                                                                                                                                         | Patient characteristics mean age (range) , male (%), race/ethnicity, comorbidity, household income, parent education, family dysfunction/stressor, treatment sequence, insurance, history of maltreatment) | Follow up after the end of intervention (weeks ) |
|--------------------|------------------------------------------------------------|--------------------------------|----------------------------------------------|-------------------------------------------------------------------------------------------------------------------------------------------------------------------------------------------------------------------------------------------------------------------------------|------------------------------------------------------------------------------------------------------------------------------------------------------------------------------------------------------------|--------------------------------------------------|
| 2000 <sup>77</sup> | RCT<br>Mental Health Clinic                                | SoP                            | plus separate parent intervention (N=17)     | CBT with parent Involvement<br>Group based<br>Exposure<br>Relaxation<br>Cognitive problem solving<br>12 1.5-hour weekly sessions, 2 1.5-hour boosters; parents observe 60 minutes of child group, then have 30 minute sessions<br>Delivered by 2 doctoral level psychologists | 14)<br>Males: 59%<br>ODD: 12%<br>ADHD: 6%                                                                                                                                                                  |                                                  |
|                    |                                                            |                                | Child CBT (N=19)                             | Generic CBT<br>Child CBT- (parents included < 20%)<br>CBT without Parent Involvement<br>Group based<br>Exposure<br>Relaxation<br>Cognitive problem solving<br>12 1.5-hour weekly sessions, 2 1.5-hour boosters Delivered by 2 doctoral level psychologists.                   | Mean age: 11 (range: 7-14)<br>Males: 53%<br>ODD: 10%<br>Dysthymia: 5%                                                                                                                                      |                                                  |
|                    |                                                            |                                | Control (N=14)                               | Waitlisting or no treatment                                                                                                                                                                                                                                                   | Mean age: 9.93 (range: 7-14)<br>Males: 79%<br>Dysthymia: 7%                                                                                                                                                |                                                  |



| Author, Year               | Study country, study design, type of study, study settings | Type of anxiety/Severity (CGI) | Intervention and comparisons (n of patients)       | Characteristics of interventions (psychotherapy: components, delivery model)/pharm: drug intensity, duration (weeks))                                                                                                                                                                                                        | Patient characteristics mean age (range) , male (%), race/ethnicity, comorbidity, household income, parent education, family dysfunction/stressor, treatment sequence, insurance, history of maltreatment) | Follow up after the end of intervention (weeks ) |
|----------------------------|------------------------------------------------------------|--------------------------------|----------------------------------------------------|------------------------------------------------------------------------------------------------------------------------------------------------------------------------------------------------------------------------------------------------------------------------------------------------------------------------------|------------------------------------------------------------------------------------------------------------------------------------------------------------------------------------------------------------|--------------------------------------------------|
| Spence, 2006 <sup>78</sup> | Australia<br>RCT<br>Mental Health Clinic                   | GAD, SAD, SP<br>SoP            | Child CBT plus separate parent intervention (N=22) | Generic CBT<br>Group based<br>Exposure<br>Relaxation<br>Cognitive problem solving<br>10 60-minute weekly child sessions and 6 60-minute weekly parent sessions, plus booster sessions at 1 and 3 months<br>Delivered by 5 doctoral level psychologists.                                                                      | Mean age: 10.26 (Range 7-14)<br>Male: 59%                                                                                                                                                                  | 12                                               |
|                            |                                                            |                                | Distance Therapy (N=27)                            | Generic CBT<br>Internet CBT<br>Group based<br>Exposure<br>Relaxation<br>Cognitive problem solving<br>5 of the 10 child sessions plus the 3-month booster via Internet, with the remaining sessions being conducted in the clinic; 3 of the 6 parents sessions and the 3-month via Internet<br>Delivered through the internet | Mean age: 9.8 (Range 7-14)<br>Male: 59.2%                                                                                                                                                                  |                                                  |
|                            |                                                            |                                | Control (N=23)                                     | Waitlisting or no treatment                                                                                                                                                                                                                                                                                                  | Mean age: 9.8 (Range 7-14)<br>Male: 56.5%                                                                                                                                                                  |                                                  |
| Spence, 2011 <sup>79</sup> | Australia<br>RCT<br>Mental Health Clinic                   | GAD, SAD, SoP, SP              | Distance Therapy (N=44)                            | Brave online<br>Technology-based<br>Individual based<br>Exposure                                                                                                                                                                                                                                                             | Mean age: 13.98 (range: 12-18)<br>Males: 41%<br>High income(>\$76,910):                                                                                                                                    | 52                                               |

| Author, Year               | Study country, study design, type of study, study settings | Type of anxiety/Severity (CGI) | Intervention and comparisons (n of patients)                                                                                                                                                                                                                                | Characteristics of interventions (psychotherapy: components, delivery model)/pharm: drug intensity, duration (weeks))                                                                                                                            | Patient characteristics mean age (range) , male (%), race/ethnicity, comorbidity, household income, parent education, family dysfunction/stressor, treatment sequence, insurance, history of maltreatment) | Follow up after the end of intervention (weeks ) |
|----------------------------|------------------------------------------------------------|--------------------------------|-----------------------------------------------------------------------------------------------------------------------------------------------------------------------------------------------------------------------------------------------------------------------------|--------------------------------------------------------------------------------------------------------------------------------------------------------------------------------------------------------------------------------------------------|------------------------------------------------------------------------------------------------------------------------------------------------------------------------------------------------------------|--------------------------------------------------|
|                            |                                                            |                                |                                                                                                                                                                                                                                                                             | Relaxation<br>Cognitive problem solving<br>10 adolescents weekly sessions and 5 parent sessions (60 minutes each) over 12 weeks; 1 15-minute phone call, email feedback after each session<br>Delivered by psychologist, masters level clinician | 47%<br>College graduate (parent): 58%<br>Depression: 2.6%<br>ODD: 1.7%<br>Dysthymic disorder: 9.7%                                                                                                         |                                                  |
|                            |                                                            |                                | Child CBT plus separate parent intervention (N=44)<br>Individual based<br>Exposure<br>Relaxation<br>Cognitive problem solving<br>10 adolescents weekly sessions and 5 parent sessions (60 minutes each) over 12 weeks<br>Delivered by psychologist, masters level clinician |                                                                                                                                                                                                                                                  |                                                                                                                                                                                                            |                                                  |
|                            |                                                            |                                | Control (N=27)<br>Waitlisting or no treatment                                                                                                                                                                                                                               |                                                                                                                                                                                                                                                  |                                                                                                                                                                                                            |                                                  |
| Waters, 2009 <sup>80</sup> | Australia<br>RCT<br>Outpatient                             | GAD, SAD, SoP, SP              | Child CBT plus separate parent intervention (N=38)                                                                                                                                                                                                                          | Take action<br>Group based<br>Exposure<br>Relaxation<br>Cognitive problem solving<br>10 weekly 1-hour child and one hour parents sessions<br>Delivered by psychologist                                                                           | Mean age: 6.89 (range: 4-8)<br>Males: 37%<br>Caucasian: 97%                                                                                                                                                | 52                                               |

| Author, Year                     | Study country, study design, type of study, study settings | Type of anxiety/Severity (CGI) | Intervention and comparisons (n of patients) | Characteristics of interventions (psychotherapy: components, delivery model)/pharm: drug intensity, duration (weeks))                                                                                                                                     | Patient characteristics mean age (range) , male (%), race/ethnicity, comorbidity, household income, parent education, family dysfunction/stressor, treatment sequence, insurance, history of maltreatment) | Follow up after the end of intervention (weeks ) |
|----------------------------------|------------------------------------------------------------|--------------------------------|----------------------------------------------|-----------------------------------------------------------------------------------------------------------------------------------------------------------------------------------------------------------------------------------------------------------|------------------------------------------------------------------------------------------------------------------------------------------------------------------------------------------------------------|--------------------------------------------------|
|                                  |                                                            |                                | Parent only intervention (N=31)              | Take action<br>Group based<br>Exposure<br>Relaxation<br>Cognitive problem solving<br>10 weekly 1-hour child and one hour parents sessions<br>Delivered by psychologist                                                                                    | Mean age: 6.68 (range: 4-8)<br>Males: 58%<br>Caucasian: 97%                                                                                                                                                |                                                  |
|                                  |                                                            |                                | Control (N=11)                               | Waitlisting or no treatment                                                                                                                                                                                                                               | Mean age: 6.79 (range 4-8)<br>Males: 55%<br>Caucasian: 91%                                                                                                                                                 |                                                  |
| Warner, 2011 <sup>81</sup>       | United States<br>RCT<br>Outpatient                         | GAD, SAD,<br>SoP, SP           | Child CBT (N=20)                             | TAPS<br>Child CBT- (parents included < 20%)<br>Individual based<br>Exposure<br>Relaxation<br>Cognitive problem solving<br>12 individual sessions (45–60 minutes each) with 3 parent meetings (45 minutes each) over 10 weeks<br>Delivered by psychologist | Mean age: 12.4 (range: 8-16)<br>Males: 35%<br>Caucasian: 73.5%<br>African American: 2.5%<br>Hispanic: 15%<br>Other: 10%<br>Income range: \$31,000-\$120,000                                                | 13                                               |
|                                  |                                                            |                                | Control (N=20)                               | Waitlisting or no treatment                                                                                                                                                                                                                               |                                                                                                                                                                                                            |                                                  |
| Wergeland, 2014 <sup>82,83</sup> | Norway<br>RCT                                              | GAD, SAD,<br>SoP               | Child CBT (N=91)                             | Friends<br>Child CBT- (parents included <                                                                                                                                                                                                                 | Mean age: 11.4 (range: 8-15)                                                                                                                                                                               | 52                                               |

| Author, Year | Study country, study design, type of study, study settings | Type of anxiety/Severity (CGI) | Intervention and comparisons (n of patients) | Characteristics of interventions (psychotherapy: components, delivery model)/pharm: drug intensity, duration (weeks))                                                                                                                         | Patient characteristics mean age (range) , male (%), race/ethnicity, comorbidity, household income, parent education, family dysfunction/stressor, treatment sequence, insurance, history of maltreatment) | Follow up after the end of intervention (weeks ) |
|--------------|------------------------------------------------------------|--------------------------------|----------------------------------------------|-----------------------------------------------------------------------------------------------------------------------------------------------------------------------------------------------------------------------------------------------|------------------------------------------------------------------------------------------------------------------------------------------------------------------------------------------------------------|--------------------------------------------------|
|              | Outpatient                                                 |                                |                                              | 20%)<br>Individual based<br>Exposure<br>Relaxation<br>Cognitive problem solving<br>10 weekly sessions, lasting 60 min (ICBT), plus 2 parent only sessions<br>Delivered by Psychologist, Masters level Clinician                               | Males: 48%<br>Caucasian: 76%<br>Hispanic: 0.5%<br>Asian: 3%<br>ADHD: 5%<br>Depression: 8%<br>ODD: 9%<br>Tic disorder: 7%                                                                                   |                                                  |
|              |                                                            |                                | Child CBT (N=88)                             | Friends<br>Child CBT- (parents included < 20%)<br>Group based<br>Exposure<br>Relaxation<br>Cognitive problem solving<br>10 weekly sessions, lasting 90 minutes, plus 2 parents sessions<br>Delivered by Psychologist, Masters level Clinician | Mean age: 11.7 (range: 8-15)<br>Males: 45%<br>Caucasian: 76%<br>Hispanic: 0.5%<br>Asian: 3%<br>ADHD: 6%<br>Depression: 16%<br>ODD: 2%<br>Tic disorder: 7%                                                  |                                                  |
|              |                                                            |                                | Control (N=38)                               | Waitlisting or no treatment                                                                                                                                                                                                                   | Mean age: 11.4 (range: 8-15)<br>Males: 50%<br>Caucasian: 76%<br>Hispanic: 0.5%<br>Asian: 3%<br>ADHD: 3%<br>Depression: 11%<br>ODD: 8%<br>Tic disorder: 5%                                                  |                                                  |

| Author, Year              | Study country, study design, type of study, study settings | Type of anxiety/Severity (CGI)         | Intervention and comparisons (n of patients)       | Characteristics of interventions (psychotherapy: components, delivery model)/pharm: drug intensity, duration (weeks))                                                                                                                                             | Patient characteristics mean age (range) , male (%), race/ethnicity, comorbidity, household income, parent education, family dysfunction/stressor, treatment sequence, insurance, history of maltreatment)                                                           | Follow up after the end of intervention (weeks ) |
|---------------------------|------------------------------------------------------------|----------------------------------------|----------------------------------------------------|-------------------------------------------------------------------------------------------------------------------------------------------------------------------------------------------------------------------------------------------------------------------|----------------------------------------------------------------------------------------------------------------------------------------------------------------------------------------------------------------------------------------------------------------------|--------------------------------------------------|
| White, 2013 <sup>84</sup> | United States RCT Mental Health Clinic                     | GAD, PD with agoraphobia, SAD, SoP, SP | Child CBT plus separate parent intervention (N=15) | Social Skills training<br>Exposure<br>Cognitive problem solving<br>Individual therapy (up to 13 sessions), group therapy (skills practice, 7 sessions), and parent education and coaching (after each individual therapy session)<br>Delivered by student/trainee | Mean age: 14 (range: 12-17)<br>Males: 73%<br>Caucasian: 80%<br>Asian: 7%<br>African American: 7%<br>Other: 7%<br>Autism: 100%<br>OCD: 20%                                                                                                                            | 0                                                |
|                           |                                                            |                                        | Control (N=15)                                     | Waitlisting or no treatment                                                                                                                                                                                                                                       | Mean age: 15 (range: 12-17)<br>Males: 80%<br>Caucasian: 93%<br>African American: 7%<br>Autism: 100%<br>OCD: 20%<br>PTSD: 7%                                                                                                                                          |                                                  |
| Wood, 2009 <sup>85</sup>  | United States RCT Outpatient                               | GAD, SAD, SoP                          | Child and parent together CBT (N=17)               | Building confidence<br>Individual based<br>Exposure<br>Cognitive problem solving<br>16 session 90 minutes (about 30 minutes with the child and 60 minutes with the parents/family)<br>Delivered by Psychologist, Student/trainee                                  | Mean age: 9.2 (Range 7-11)<br>Males: 71%<br>Caucasian: 47%<br>Hispanic: 12%<br>Asian: 24%<br>Others: 18%<br>Low income (<\$40,000): 22%<br>Medium Income ( \$40,000-\$90,000): 25%<br>High Income (>\$90,000): 45%<br>College Graduate (parent); 71%<br>Autism: 100% | 0                                                |

| Author, Year | Study country, study design, type of study, study settings | Type of anxiety/Severity (CGI) | Intervention and comparisons (n of patients) | Characteristics of interventions (psychotherapy: components, delivery model)/pharm: drug intensity, duration (weeks)) | Patient characteristics mean age (range) , male (%), race/ethnicity, comorbidity, household income, parent education, family dysfunction/stressor, treatment sequence, insurance, history of maltreatment)                                                                                                                               | Follow up after the end of intervention (weeks ) |
|--------------|------------------------------------------------------------|--------------------------------|----------------------------------------------|-----------------------------------------------------------------------------------------------------------------------|------------------------------------------------------------------------------------------------------------------------------------------------------------------------------------------------------------------------------------------------------------------------------------------------------------------------------------------|--------------------------------------------------|
|              |                                                            |                                |                                              |                                                                                                                       | ADHD: 53%<br>OCD: 47%<br>ODD: 12%<br>Dysthymia: 18%                                                                                                                                                                                                                                                                                      |                                                  |
|              |                                                            |                                | Control (N=23)                               | Waitlisting or no treatment                                                                                           | Mean age: 9.18 (Range 7-11)<br>Males: 65%<br>Caucasian: 48%<br>African American: 4%<br>Hispanic: 13%<br>Low income (<\$40,000):22%<br>Medium Income ( \$40,000-\$90,000):25%<br>High Income (>\$90,000):45%<br>Asian:9%<br>Others: 26%<br>College Graduate (parent): 60%<br>Autism: 100%<br>ADHD:65%<br>OCD: 39%<br>ODD: 26%<br>PTSD: 4% |                                                  |

ACT: acceptance and commitment theory, ADHD: attention deficit hyperactivity disorder, IAFS: intervencion en adolescents con fobia social (treatment for adolescents with social phobia), CBT: cognitive behavioral therapy, CGI: clinical global impression scale, GAD: generalized anxiety disorder, NR: not reported, OCD: obsessive compulsive disorder, ODD: oppositional defiant disorder, OST: one session treatment, PD: panic disorder, PTSD: post-traumatic stress disorder, RCT: randomized controlled trial, SAD: separation anxiety disorder, SET-C: social effectiveness therapy, SHY: the SHY manual for social anxiety, SoP: social anxiety, SP: specific phobia. TAPS: treatment of anxiety and physical symptoms

**eTable 5.** Characteristics of the included studies comparing CBT vs pill placebo

| Author, Year                  | Study country, study design, type of study, study settings | Type of anxiety/Severity (CGI) | Intervention and comparisons (n of patients) | Characteristics of interventions (psychotherapy: components, delivery model)/pharm: drug intensity, duration (weeks))                                                                                                                            | Patient characteristics mean age (range) , male (%), race/ethnicity, comorbidity, household income, parent education, family dysfunction/stressor, treatment sequence, insurance, history of maltreatment)   | Follow up after the end of intervention (weeks ) |
|-------------------------------|------------------------------------------------------------|--------------------------------|----------------------------------------------|--------------------------------------------------------------------------------------------------------------------------------------------------------------------------------------------------------------------------------------------------|--------------------------------------------------------------------------------------------------------------------------------------------------------------------------------------------------------------|--------------------------------------------------|
| Beidel, 2007 <sup>24</sup>    | United States RCT<br>Mental Health Clinic                  | GAD, SAD, SP, SoP              | SSRI: Fluoxetine (N=43)                      | 10mg per day during week 1 and 2. Increasing dose up to 40mg/day for up to 12 weeks.                                                                                                                                                             | Mean age:11.56 (Range 7 – 17)<br>Male: 53.23%<br>Caucasian: 74.1%<br>African American: 15.1%<br>Hispanic: 2.1%<br>Asian: 2.8%<br>Other: 3.5%                                                                 | 52                                               |
|                               |                                                            |                                | Child CBT (N=59)                             | Social Effectiveness Therapy (SET-C)<br>Child CBT (Parents included <20%)<br>Group and Individual based, Exposure, Relaxation, and Cognitive Problem Solving. 60 min individual session and one 150 min group session twice a week for 12 weeks. |                                                                                                                                                                                                              |                                                  |
|                               |                                                            |                                | Control (N=37)                               | Pill Placebo                                                                                                                                                                                                                                     |                                                                                                                                                                                                              |                                                  |
| Walkup, 2008 <sup>17-23</sup> | United States RCT<br>Outpatient                            | GAD,SAD, SoP                   | Child CBT (N=139)                            | Coping Cat<br>Child CBT (parents included <20%)<br>Individual-based., Exposure, relaxation, cognitive problem solving.<br>60-minute session once a week for 12 weeks.                                                                            | Mean age: 10.5<br>Male: 49.2%<br>Caucasian: 76.3%, African American:10.1%, Hispanic: 9.2%, other: 4.5%<br>Low income: 23.7%<br>ADHD: 11.5%, ODD:13.8%, Tic disorder and other internalizing disorders: 41.7% | 0                                                |



| Author, Year | Study country, study design, type of study, study settings | Type of anxiety/Severity (CGI) | Intervention and comparisons (n of patients)                  | Characteristics of interventions (psychotherapy: components, delivery model)/pharm: drug intensity, duration (weeks))                                                                                                    | Patient characteristics mean age (range) , male (%), race/ethnicity, comorbidity, household income, parent education, family dysfunction/stressor, treatment sequence, insurance, history of maltreatment) | Follow up after the end of intervention (weeks ) |
|--------------|------------------------------------------------------------|--------------------------------|---------------------------------------------------------------|--------------------------------------------------------------------------------------------------------------------------------------------------------------------------------------------------------------------------|------------------------------------------------------------------------------------------------------------------------------------------------------------------------------------------------------------|--------------------------------------------------|
|              |                                                            |                                | SSRI: Sertraline (N=133)                                      | Beginning with 25mg/day Up to 200 mg/day by 8 <sup>th</sup> week, for 12 weeks.                                                                                                                                          | Mean age: 10.8<br>Male: 51.1%<br>Caucasian: 77.4%, African American: 9%, Hispanic: 11.3%, other: 2.3%<br>Low income: 26.3%<br>ADHD: 12.7%, ODD:8.2%, Tic disorder and other internalizing disorders: 55.6% |                                                  |
|              |                                                            |                                | Combination therapy: CBT+ SSRI: Child CBT+ Sertraline (N=140) | Coping Cat, Child CBT (parents included <20%)<br>Individual-based, Exposure, relaxation and cognitive problem solving plus Sertraline.<br>60-minute session once a week for 12 weeks plus up to 200 mg/day for 12 weeks. | Mean age: 10.7<br>Male: 49.6%<br>Caucasian: 82.9%, African American: 7.9%, Hispanic: 5.6%, other: 3.6%<br>Low income: 25.0%<br>ADHD: 11.4%, ODD:10%, Tic disorder and other internalizing disorders: 42.8% |                                                  |
|              |                                                            |                                | Control (N=76)                                                | Pill Placebo                                                                                                                                                                                                             | Mean age: 10.6<br>Male : 51.3%<br>Caucasian: 79%, African American: 9%, Hispanic: 9%, other: 3%<br>Low income: 27.6%<br>ADHD: 11.8%, ODD:9.2%, Tic disorder and other internalizing disorders: 44.7%       |                                                  |

ACT: acceptance and commitment theory, ADHD: attention deficit hyperactivity disorder, IAFS: intervencion en adolescentes con fobia social (treatment for adolescents with social phobia), CBT: cognitive behavioral therapy, CGI: clinical global impression scale, GAD: generalized anxiety disorder, NR: not reported, OCD: obsessive compulsive disorder, ODD: oppositional defiant disorder, OST: one session treatment, PD: panic disorder, PTSD: post-traumatic stress disorder, RCT: randomized controlled trial, SAD: separation anxiety disorder, SET-C: social effectiveness therapy, SHY: the SHY manual for social anxiety, SoP: social anxiety, SP: specific phobia. TAPS: treatment of anxiety and physical symptoms

**eTable 6.** Characteristics of the included studies comparing CBT vs attention control/treatment as usual

| Author, Year                 | Study country, study design, type of study, study settings | Type of anxiety/Severity (CGI) | Intervention and comparisons (n of patients) | Characteristics of interventions (psychotherapy: components, delivery model)/pharm: drug intensity, duration (weeks))                                                                                                                                                                         | Patient characteristics mean age (range) , male (%), race/ethnicity, comorbidity, household income, parent education, family dysfunction/stressor, treatment sequence, insurance, history of maltreatment) | Follow up after the end of intervention (weeks ) |
|------------------------------|------------------------------------------------------------|--------------------------------|----------------------------------------------|-----------------------------------------------------------------------------------------------------------------------------------------------------------------------------------------------------------------------------------------------------------------------------------------------|------------------------------------------------------------------------------------------------------------------------------------------------------------------------------------------------------------|--------------------------------------------------|
| Ginsburg, 2002 <sup>86</sup> | United States RCT School                                   | GAD, SP, SoP, PD (agoraphobia) | Child CBT (N=6)                              | Group-based, Exposure, Relaxation, Cognitive problem solving. 45 min session over 10 weeks delivered by psychiatrists. No parent involvement.                                                                                                                                                 | Mean age: 15.6 (Range 14-17)<br>Male: 16.6%<br>African Americans: 100%                                                                                                                                     | 10                                               |
|                              |                                                            |                                | Control (N=6)                                | Attention Control or Treatment as Usual<br>Group based.<br>45-50 min session, one session a week, 10 sessions delivered by student trainee.                                                                                                                                                   |                                                                                                                                                                                                            |                                                  |
| Ginsburg, 2012 <sup>87</sup> | United States RCT School-based Mental Health Clinic        | GAD,SAD, SoP, SP               | Child CBT (N=17)                             | Modular CBT<br>Child CBT- (parents included < 20%)<br>Individual based<br>Exposure<br>Relaxation<br>Cognitive problem solving<br>8 modules over 12 weeks (average 7.29); 20-45min sessions in school; efforts to involve parents in at least 3 sessions<br>Delivered by doctoral psychologist | Mean age: 11.12<br>Male: 29.4%<br>African American: 82%, other: 18%<br>Low income: 23.5%<br>Family stress: 100%                                                                                            | 4                                                |
|                              |                                                            |                                | Control (N=15)                               | Attention Control or Treatment as Usual                                                                                                                                                                                                                                                       |                                                                                                                                                                                                            |                                                  |

| Author, Year                       | Study country, study design, type of study, study settings | Type of anxiety/Severity (CGI)                        | Intervention and comparisons (n of patients) | Characteristics of interventions (psychotherapy: components, delivery model)/pharm: drug intensity, duration (weeks))                                                         | Patient characteristics mean age (range) , male (%), race/ethnicity, comorbidity, household income, parent education, family dysfunction/stressor, treatment sequence, insurance, history of maltreatment) | Follow up after the end of intervention (weeks ) |
|------------------------------------|------------------------------------------------------------|-------------------------------------------------------|----------------------------------------------|-------------------------------------------------------------------------------------------------------------------------------------------------------------------------------|------------------------------------------------------------------------------------------------------------------------------------------------------------------------------------------------------------|--------------------------------------------------|
|                                    |                                                            |                                                       |                                              |                                                                                                                                                                               | Family stress: 100%                                                                                                                                                                                        |                                                  |
| Halldorsdottir, 2016 <sup>88</sup> | United States RCT Outpatient                               | GAD, SoP                                              | Child CBT (N=50)                             | OST<br>Exposure, Relaxation, Cognitive Problem Solving<br>Individual-based<br>180 minute one session only                                                                     | Mean age: 9.24<br>Male: 88%<br>Mean income: 71.450                                                                                                                                                         | 208                                              |
|                                    |                                                            |                                                       | Control (N=33)                               | Attention Control or Treatment as Usual<br>Individual-based                                                                                                                   | Mean age: 8.97<br>Male: 90%<br>Mean income: \$73,232                                                                                                                                                       |                                                  |
| Herbert, 2009 <sup>89</sup>        | United States RCT Mental Health Clinic                     | GAD , PD (agoraphobia is not specified), SAD, SP, SoP | Child CBT (N= 23)                            | Generic CBT<br>Group based<br>Relaxation, exposure, Cognitive problem solving<br>Delivered by master level clinicians.<br>120 min session per week for 12 weeks               | Mean age: 14.6 (range 12 - 17)<br>Male : 56.5%<br>Caucasian: 52%, African Americans: 39%, Asian: 8.6%                                                                                                      | 52                                               |
|                                    |                                                            |                                                       | Child CBT (N= 24)                            | Generic CBT<br>Individual based<br>Relaxation, exposure, cognitive problem solving<br>Delivered by master level clinicians.<br>60 min session per week for 12 weeks.          | Mean age: 14.3 (range 12 - 17)<br>Male: 25%<br>Caucasian: 54.2%, African Americans: 45.8%                                                                                                                  |                                                  |
|                                    |                                                            |                                                       | Control (N=26)                               | Attention Control or Treatment as Usual<br>Psychoeducational-Supportive Therapy, Group based<br>Delivered by master level clinicians<br>120 min session per week for 12 weeks | Mean age: 15.1 (range 12- 17)<br>Male: 53.8%<br>Caucasian: 34.6%, African American: 50%, Hispanics: 7.69%<br>Asians: 7.69%                                                                                 |                                                  |

| Author, Year               | Study country, study design, type of study, study settings | Type of anxiety/Severity (CGI) | Intervention and comparisons (n of patients) | Characteristics of interventions (psychotherapy: components, delivery model)/pharm: drug intensity, duration (weeks))                           | Patient characteristics mean age (range) , male (%), race/ethnicity, comorbidity, household income, parent education, family dysfunction/stressor, treatment sequence, insurance, history of maltreatment) | Follow up after the end of intervention (weeks ) |
|----------------------------|------------------------------------------------------------|--------------------------------|----------------------------------------------|-------------------------------------------------------------------------------------------------------------------------------------------------|------------------------------------------------------------------------------------------------------------------------------------------------------------------------------------------------------------|--------------------------------------------------|
| Hudson, 2009 <sup>90</sup> | Australia<br>RCT<br>Mental Health Clinic                   | GAD ,SAD, PD, SP, SoP          | Child and parent together CBT (N= 60)        | Cool kids Group based Exposure, Cognitive Problem Solving. 120 min session per week for 10 weeks.                                               | Mean age; 10.2 (SD 2.4) (Range 7-16)<br>Male: 53.3%<br>Caucasian: 75%, Asian 6.6%, other:3.3%<br>Low income: n= 8<br>Medium income: n= 21<br>High income: n= 22                                            | 13                                               |
|                            |                                                            |                                | Control (N=52)                               | Attention Control or Treatment as Usual Group Support and Attention, group based 120 min session per week for 10 weeks                          | Mean age: 10.2 (SD 2.7) (Range 7-16)<br>Male: 40.3%<br>Caucasian: 65.3%%, Asian: 11.5%, others 5.7%<br>Low income: n=16<br>Medium income: n=11<br>High income: n=17                                        |                                                  |
| Ingul, 2014 <sup>91</sup>  | Norway<br>RCT<br>Mental Health Clinic                      | SoP                            | Child CBT (N=36)                             | Other CBT Exposure, Cognitive Problem Solving Individual-based Delivered by psychologist and masters level clinician 12, 50 min weekly sessions | Age mean: 14.98 (SD:0.94)<br>Males: 43%<br>ADHD: 14.29%<br>Depression: 9.52%<br>PTSD: 4.76%                                                                                                                | 52                                               |
|                            |                                                            |                                | Child CBT (N=58)                             | Cat Project Exposure, Cognitive Problem Solving Group based 10, 90 min sessions                                                                 | Age mean: 14.30(SD:0.89)<br>Males: 40%<br>ADHD: 5%<br>Depression: 10%                                                                                                                                      |                                                  |

| Author, Year                   | Study country, study design, type of study, study settings | Type of anxiety/Severity (CGI) | Intervention and comparisons (n of patients) | Characteristics of interventions (psychotherapy: components, delivery model)/pharm: drug intensity, duration (weeks))                              | Patient characteristics mean age (range) , male (%), race/ethnicity, comorbidity, household income, parent education, family dysfunction/stressor, treatment sequence, insurance, history of maltreatment) | Follow up after the end of intervention (weeks ) |
|--------------------------------|------------------------------------------------------------|--------------------------------|----------------------------------------------|----------------------------------------------------------------------------------------------------------------------------------------------------|------------------------------------------------------------------------------------------------------------------------------------------------------------------------------------------------------------|--------------------------------------------------|
|                                |                                                            |                                | Control (N=34)                               | Attention Control or Treatment as Usual<br>10, 90 min sessions                                                                                     | Age mean: 14.16 (SD:1.08)<br>Males: 43%<br>ADHD: 6.25%<br>Depression: 6.25%<br>OCD: 6.25%<br>PTSD: 6.25%                                                                                                   |                                                  |
| Kendall, 2008 <sup>92,93</sup> | United States RCT<br>Mental Health Clinic                  | GAD,SAD, SoP,SP                | Child CBT (N=55)                             | Coping Cat: Exposure , Relaxation, Cognitive problem solving<br>Individual-based<br>Weekly for 16 weeks, 60 min each session, parents at two       | Age mean (years): 10.37<br>range (7-14)<br>Caucasian: 83%<br>Other:16%<br>Low income (<\$40,000): 20%<br>Medium income (\$40,000-\$90,000):34%<br>High income (>\$90,000):38%                              | 52                                               |
|                                |                                                            |                                | Child and parent together CBT (N=56)         | CC derivative<br>Exposure<br>Relaxation<br>Cognitive problem solving<br>Individual-based, family based<br>Weekly for 16 weeks, 60 min each session | Age mean (years): 10.41<br>range (7-14)<br>Caucasian: 80%<br>Other: 16%<br>Low income (<\$40,000): 14%<br>Medium income (\$40,000-\$90,000):46%<br>High income (>\$90,000):32%                             |                                                  |
|                                |                                                            |                                | Control (N=50)                               | Attention Control or Treatment as Usual<br>Family education, support, and                                                                          | Age mean (years): 10.03<br>range (7-14)<br>Caucasian: 88%                                                                                                                                                  |                                                  |

| Author, Year               | Study country, study design, type of study, study settings | Type of anxiety/Severity (CGI) | Intervention and comparisons (n of patients) | Characteristics of interventions (psychotherapy: components, delivery model)/pharm: drug intensity, duration (weeks))                                                          | Patient characteristics mean age (range) , male (%), race/ethnicity, comorbidity, household income, parent education, family dysfunction/stressor, treatment sequence, insurance, history of maltreatment) | Follow up after the end of intervention (weeks ) |
|----------------------------|------------------------------------------------------------|--------------------------------|----------------------------------------------|--------------------------------------------------------------------------------------------------------------------------------------------------------------------------------|------------------------------------------------------------------------------------------------------------------------------------------------------------------------------------------------------------|--------------------------------------------------|
|                            |                                                            |                                |                                              | attention<br>Weekly for 16 weeks, 60 min each session                                                                                                                          | Other:12%<br>Low income (<\$40,000): 10%<br>Medium income (\$40,000-\$90,000):50%<br>High income (>\$90,000):30%                                                                                           |                                                  |
| Khanna, 2010 <sup>94</sup> | United States<br>RCT<br>Mental Health Clinic               | GAD, PD, SAD, SoP, SP          | Child CBT (N=17)                             | Coping cat<br>Exposure<br>Relaxation<br>Cognitive problem solving<br>Individual-based<br>Delivered by psychologist, student/trainee<br>Weekly for 12 weeks, 50 minute sessions | Age mean (years): 10.1 (range: 7-13)<br>Males: 67%<br>Caucasian: 83%<br>African American: 14%<br>Hispanic: 2%<br>ADHD: 16%<br>ODD:4%<br>Tic disorder: 2%                                                   | 13                                               |
|                            |                                                            |                                | Distance (N=16)                              | Camp cope a lot<br>Exposure<br>Relaxation<br>Cognitive problem solving<br>Individual based<br>Delivered by psychologist, student/trainee<br>Weekly for 12 weeks,               |                                                                                                                                                                                                            |                                                  |
|                            |                                                            |                                | Control (N=16)                               | Attention Control or Treatment as Usual<br>Individual-based, Technology-based<br>Delivered by psychologist, student/trainee<br>Weekly for 12 weeks, 60 minute                  |                                                                                                                                                                                                            |                                                  |

| Author, Year                     | Study country, study design, type of study, study settings | Type of anxiety/Severity (CGI) | Intervention and comparisons (n of patients) | Characteristics of interventions (psychotherapy: components, delivery model)/pharm: drug intensity, duration (weeks))                                                                                                             | Patient characteristics mean age (range) , male (%), race/ethnicity, comorbidity, household income, parent education, family dysfunction/stressor, treatment sequence, insurance, history of maltreatment) | Follow up after the end of intervention (weeks ) |
|----------------------------------|------------------------------------------------------------|--------------------------------|----------------------------------------------|-----------------------------------------------------------------------------------------------------------------------------------------------------------------------------------------------------------------------------------|------------------------------------------------------------------------------------------------------------------------------------------------------------------------------------------------------------|--------------------------------------------------|
|                                  |                                                            |                                |                                              | sessions. 30 minutes of support and 30 minutes of computer.                                                                                                                                                                       |                                                                                                                                                                                                            |                                                  |
| Last, 1998 <sup>95</sup>         | United States RCT Mental Health Clinic                     | SoP                            | Child and Parent together CBT (N=32)         | Generic CBT Exposure<br>Cognitive Problem solving<br>Delivered by therapists and school contact person.<br>12, 60 min weekly sessions                                                                                             | Age mean (years): 11.67<br>Male: 59.3%<br>Caucasian: 65.6%<br>Hispanic: 3.1%<br>African American: 3.1%                                                                                                     | 4                                                |
|                                  |                                                            |                                | Control (N=24)                               | Attention Control or Treatment as Usual<br>12, 60 min weekly sessions                                                                                                                                                             | Age mean (years): 12.4<br>Male: 37.5%<br>Caucasian: 87.5%<br>African American: 4.1%<br>Hispanic: 8.2%                                                                                                      |                                                  |
| Masia-Warner, 2007 <sup>96</sup> | United States RCT School                                   | GAD, SAD, SoP                  | Child CBT (N=19)                             | SASS: Skills for Academic and Social Success,<br>Individual-based, group-based, Exposure<br>Cognitive Problem Solving,<br>12 group sessions (40 minutes) and 2 individuals delivered by 2 doctoral level psychologists            | Age mean (years): 15 (Range 14 -16)<br>Male: 15.7%<br>Caucasian: 73.6%,<br>African: 5.2%<br>African:15.78%, other: 5.2%                                                                                    | 6                                                |
|                                  |                                                            |                                | Control (N=17)                               | Attention Control or Treatment as Usual<br>Educational Supportive Group Function (ESGF),<br>Individual-based, group-based, Relaxation<br>Cognitive strategies<br>12 group sessions and 2 individual delivered by 2 doctoral level | Age mean (years): 15.1 (Range 14-16)<br>Male: 17.64<br><br>Caucasian: 70.5%, African: 5.88%<br>Hispanic: 17.6%, other: 5.88%                                                                               |                                                  |

| Author, Year                  | Study country, study design, type of study, study settings | Type of anxiety/Severity (CGI) | Intervention and comparisons (n of patients) | Characteristics of interventions (psychotherapy: components, delivery model)/pharm: drug intensity, duration (weeks))                                                                                | Patient characteristics mean age (range) , male (%), race/ethnicity, comorbidity, household income, parent education, family dysfunction/stressor, treatment sequence, insurance, history of maltreatment) | Follow up after the end of intervention (weeks ) |
|-------------------------------|------------------------------------------------------------|--------------------------------|----------------------------------------------|------------------------------------------------------------------------------------------------------------------------------------------------------------------------------------------------------|------------------------------------------------------------------------------------------------------------------------------------------------------------------------------------------------------------|--------------------------------------------------|
|                               |                                                            |                                |                                              | psychologists.                                                                                                                                                                                       |                                                                                                                                                                                                            |                                                  |
| Muris, 2002 <sup>97</sup>     | Netherlands RCT School                                     | GAD, SAD, SoP                  | Child CBT (N=10)                             | Coping Koala Group based Exposure Relaxation Cognitive problem solving 12 30-minute sessions. 2 sessions per week delivered by student/trainee                                                       | Age range (9-12) years<br>Caucasian: 90%<br>Other: 10%<br>Low income: 13<br>Medium income: 6<br>High income: 1<br>Male int1 ; 30%<br>Male Int2 : 40%                                                       | 13                                               |
|                               |                                                            |                                | Control (N=10)                               | Attention Control or Treatment as Usual Emotional disclosure treatment program. Group based. 12 30-minute sessions over 6 weeks                                                                      |                                                                                                                                                                                                            |                                                  |
| O'Brien, 2007 <sup>98</sup>   | Ireland RCT Mental Health Clinic                           | Anxiety disorder               | Child CBT (N=7)                              | Friends Child CBT- (parents included < 20%) Group based Exposure Relaxation Cognitive problem solving 10 90-minute weekly sessions, plus three parent session Delivered by 2 master level clinicians | Age mean (years): 13.8 (Range 7 – 15)<br>Male: 28.57%                                                                                                                                                      | 4                                                |
|                               |                                                            |                                | Control (N=7)                                | Attention Control or Treatment as Usual                                                                                                                                                              |                                                                                                                                                                                                            |                                                  |
| Ollendick, 2009 <sup>62</sup> | United States and Sweden                                   | SP, SoP, SAD, GAD              | Child CBT (N=85)                             | OST Child CBT- (parents included <                                                                                                                                                                   | Caucasian: 90%,<br>African American: 2.5%                                                                                                                                                                  | 36                                               |



| Author, Year                 | Study country, study design, type of study, study settings | Type of anxiety/Severity (CGI)                            | Intervention and comparisons (n of patients)                                                                                           | Characteristics of interventions (psychotherapy: components, delivery model)/pharm: drug intensity, duration (weeks))                                                | Patient characteristics mean age (range) , male (%), race/ethnicity, comorbidity, household income, parent education, family dysfunction/stressor, treatment sequence, insurance, history of maltreatment) | Follow up after the end of intervention (weeks ) |
|------------------------------|------------------------------------------------------------|-----------------------------------------------------------|----------------------------------------------------------------------------------------------------------------------------------------|----------------------------------------------------------------------------------------------------------------------------------------------------------------------|------------------------------------------------------------------------------------------------------------------------------------------------------------------------------------------------------------|--------------------------------------------------|
|                              | RCT<br>Outpatient<br>Mental Health<br>Clinic               |                                                           |                                                                                                                                        | 20%)<br>One Session Treatment<br>Individual based<br>Exposure<br>1 session of 3 hours<br>Delivered by master level clinicians                                        | Hispanic:: 2%<br>Other: 4.5%<br>Age range 7 -16 years<br>Male: 45.8%                                                                                                                                       |                                                  |
| Control (N=70)               |                                                            |                                                           | Attention Control or Treatment as Usual<br>Education Support Treatment<br>1 session of 3 hours<br>Delivered by master level clinicians | Caucasian: 90%,<br>African American: 2.5%<br>Hispanic:: 2%<br>Other: 4.5%<br>Range 7 – 16<br>Male: 44.2%                                                             |                                                                                                                                                                                                            |                                                  |
| Control (N= 41)              |                                                            |                                                           | Waitlisting or no treatment                                                                                                            | Age range 7 -16 years<br>Male: 46.3%                                                                                                                                 |                                                                                                                                                                                                            |                                                  |
| Pincus, 2010 <sup>99</sup>   | United States<br>RCT<br>Mental Health<br>Clinic            | PD                                                        | Child CBT (N=13)                                                                                                                       | Panic control treatment<br>Exposure<br>Relaxation<br>Cognitive problem solving<br>Individual-based<br>Delivered by psychologist<br>11 sessions over 12 weeks, 50 min | Age mean (years): 15.75 (range: 14-17)<br>Males: 23%<br>Caucasian: 100%<br>Mean income: \$97,500 (SD: \$65,486)                                                                                            | 26                                               |
|                              |                                                            |                                                           | Control (N=13)                                                                                                                         | Attention Control or Treatment as Usual                                                                                                                              |                                                                                                                                                                                                            |                                                  |
| Reigada, 2015 <sup>100</sup> | United States<br>RCT<br>Mental Health<br>Clinic            | GAD,PD with agoraphobia, PD without agoraphobia, SAD, SoP | Child CBT plus separate parent intervention (N=11)                                                                                     | TAPS<br>Individual based<br>Exposure<br>Relaxation<br>Cognitive problem solving 15 sessions; 13 1-hour weekly                                                        | Age mean (years): 13.65( range: 9-17)<br>Caucasian: 82%, Other: 18%<br>Low income (Less than \$30,000 ): 10%                                                                                               | 13                                               |

| Author, Year                      | Study country, study design, type of study, study settings | Type of anxiety/Severity (CGI) | Intervention and comparisons (n of patients) | Characteristics of interventions (psychotherapy: components, delivery model)/pharm: drug intensity, duration (weeks))                     | Patient characteristics mean age (range) , male (%), race/ethnicity, comorbidity, household income, parent education, family dysfunction/stressor, treatment sequence, insurance, history of maltreatment)                                                  | Follow up after the end of intervention (weeks ) |
|-----------------------------------|------------------------------------------------------------|--------------------------------|----------------------------------------------|-------------------------------------------------------------------------------------------------------------------------------------------|-------------------------------------------------------------------------------------------------------------------------------------------------------------------------------------------------------------------------------------------------------------|--------------------------------------------------|
|                                   |                                                            |                                |                                              | sessions and 2 boosters; parents received three 1-hr sessions. Delivered by doctoral psychologist                                         | Medium income (\$30,000-\$90,000) : 20%<br>High income ( more than \$90,000) : 70%<br>Depression:18%                                                                                                                                                        |                                                  |
|                                   |                                                            |                                | Control (N=11)                               | Attention Control or Treatment as Usual<br>Offered social and emotional support                                                           | Age mean (years): 13.65( range: 9-17)<br>Caucasian: 55%, African American: 9%, Hispanic: 18%, other : 18%<br>Low income (Less than \$30,000 ) : 9%<br>Medium income (\$30,000-\$90,000) : 36%<br>High income ( more than \$90,000) : 55%<br>Depression: 27% |                                                  |
|                                   |                                                            |                                | Control (N=14)                               | Waitlisting or no treatment                                                                                                               |                                                                                                                                                                                                                                                             |                                                  |
| Rosa-Alcazar, 2007 <sup>101</sup> | Spain<br>RCT<br>Schools                                    | SoP                            | Child CBT (N=12)                             | IAFS<br>Group based<br>Exposure<br>Cognitive problem solving<br>Delivered by practicing clinician, 12 weekly sessions for 90 minutes each | Age mean (years) 15<br>Male:29%                                                                                                                                                                                                                             | 26                                               |
|                                   |                                                            |                                | Control (N=13)                               | Attention Control or Treatment as Usual<br>Educational Treatment, individual treatment-based                                              |                                                                                                                                                                                                                                                             |                                                  |

| Author, Year                       | Study country, study design, type of study, study settings | Type of anxiety/Severity (CGI)                                    | Intervention and comparisons (n of patients) | Characteristics of interventions (psychotherapy: components, delivery model)/pharm: drug intensity, duration (weeks))                                                    | Patient characteristics mean age (range) , male (%), race/ethnicity, comorbidity, household income, parent education, family dysfunction/stressor, treatment sequence, insurance, history of maltreatment) | Follow up after the end of intervention (weeks ) |
|------------------------------------|------------------------------------------------------------|-------------------------------------------------------------------|----------------------------------------------|--------------------------------------------------------------------------------------------------------------------------------------------------------------------------|------------------------------------------------------------------------------------------------------------------------------------------------------------------------------------------------------------|--------------------------------------------------|
|                                    |                                                            |                                                                   |                                              | 12 weekly sessions for 90 minutes each                                                                                                                                   |                                                                                                                                                                                                            |                                                  |
| Rosa-Alcazar, 2009 <sup>69</sup>   | Spain<br>RCT<br>Schools                                    | GAD, PD without agoraphobia, PD (agoraphobia is not specified) SP | Child CBT (N=20)                             | IAFS<br>Child CBT- (parents included < 20%)<br>Group based<br>Exposure<br>Cognitive problem solving<br>12 90-minute weekly sessions<br>Delivered by practicing clinician | Age mean (years) 15 (Range 14 -17)<br>Male:25%                                                                                                                                                             | 52                                               |
|                                    |                                                            |                                                                   | Control (N=19)                               | Attention Control or Treatment as Usual<br>Educational Treatment on anxiety and relaxation<br>12 90-minute weekly sessions                                               | Age mean (years) 14.94 (14-17)<br>Male: 31.5%                                                                                                                                                              |                                                  |
|                                    |                                                            |                                                                   | Control (N=18)                               | Attention Control or Treatment as Usual<br>Education as Placebo<br>12 sessions of health education                                                                       | Age mean (years) 14.75 (14-17)<br>Male: 16.6%                                                                                                                                                              |                                                  |
|                                    |                                                            |                                                                   | Control (N=20)                               | Waitlisting or no treatment                                                                                                                                              | Age mean (years) 14.77<br>Male: 40%                                                                                                                                                                        |                                                  |
| Southam-Gerow, 2010 <sup>102</sup> | United States<br>RCT<br>Mental Health Clinic               | GAD, PD without agoraphobia, SAD, SoP, SP                         | Child CBT (N=24)                             | Coping Cat<br>Child CBT- (parents included < 20%)<br>Individual based<br>Exposure<br>Relaxation<br>Cognitive problem solving<br>14 sessions, 1 hour sessions over        | Total population N = 48<br>Age mean (years): 10.9 (range: 8-15)<br>Males: 44%<br>Caucasian: 48%<br>African American: 12.5%<br>Hispanic: 27%<br>Other: 10%                                                  | 0                                                |

| Author, Year                | Study country, study design, type of study, study settings | Type of anxiety/Severity (CGI) | Intervention and comparisons (n of patients) | Characteristics of interventions (psychotherapy: components, delivery model)/pharm: drug intensity, duration (weeks))                                                                                                          | Patient characteristics mean age (range) , male (%), race/ethnicity, comorbidity, household income, parent education, family dysfunction/stressor, treatment sequence, insurance, history of maltreatment) | Follow up after the end of intervention (weeks ) |
|-----------------------------|------------------------------------------------------------|--------------------------------|----------------------------------------------|--------------------------------------------------------------------------------------------------------------------------------------------------------------------------------------------------------------------------------|------------------------------------------------------------------------------------------------------------------------------------------------------------------------------------------------------------|--------------------------------------------------|
|                             |                                                            |                                |                                              | 12 weeks<br>Delivered by psychologist, masters level clinicians, social workers                                                                                                                                                | Low income (<30,000): 73%<br>Medium income (30,000-90,000): 16%<br>High income (>90,000): 10%<br>ADHD: 42%<br>Depression: 8%<br>OCD:4.2%<br>ODD:37.5%<br>PTSD:6.25%<br>Dysthymic disorder: 2%              |                                                  |
|                             |                                                            |                                | Control (N=24)                               | Attention Control or Treatment as Usual                                                                                                                                                                                        |                                                                                                                                                                                                            |                                                  |
| Silk, 2016 <sup>103</sup>   | United States RCT Outpatient                               | GAD,SAD, SoP                   | Child CBT (N=90)                             | Coping Cat Individual-based<br>Exposure, Relaxation, Cognitive problem solving<br>One session per week for 16 week                                                                                                             | Age mean (years): 10.94<br>Male: 45%<br>Caucasian: 91%, African American :2% , Hispanic: 1%, Other: 6%<br>Mean income: 94.155                                                                              | 52                                               |
|                             |                                                            |                                | Control (N=43)                               | Attention Control or Treatment as Usual Supportive child centered therapy (CCT)<br>One session per week for 16 week                                                                                                            | Age mean (years): 10.98<br>Male: 41%<br>Caucasian: 88%, African American :6% , Hispanic: 2%, Other:4%<br>Mean income: 78.632                                                                               |                                                  |
| Warner, 2016 <sup>104</sup> | United States RCT Outpatient                               | GAD, PD, SAD, SP, SoP          | Child CBT (N=46)                             | SASS: Group-based exposure cognitive problem solving (Skills for Academic and Social Success provided by Psychologists)<br>Delivered by doctoral level psychologist<br>12 in school group sessions ( ranged from 50- 90 mints) | Age mean (years): 15.5<br>Male: 30.4%<br>Caucasian: 74%, African American :4% , Hispanic: 4%, Asian: 12%, Other: 4%<br>Mean income: 94.155                                                                 | 20                                               |

| Author, Year             | Study country, study design, type of study, study settings | Type of anxiety/Severity (CGI) | Intervention and comparisons (n of patients) | Characteristics of interventions (psychotherapy: components, delivery model)/pharm: drug intensity, duration (weeks))                                                           | Patient characteristics mean age (range) , male (%), race/ethnicity, comorbidity, household income, parent education, family dysfunction/stressor, treatment sequence, insurance, history of maltreatment) | Follow up after the end of intervention (weeks ) |
|--------------------------|------------------------------------------------------------|--------------------------------|----------------------------------------------|---------------------------------------------------------------------------------------------------------------------------------------------------------------------------------|------------------------------------------------------------------------------------------------------------------------------------------------------------------------------------------------------------|--------------------------------------------------|
|                          |                                                            |                                | Child CBT (N=47)                             | SASS: Group-based exposure cognitive problem solving<br>Delivered by doctoral level psychologist<br>12 in school group sessions ( ranged from 50- 90 mints)                     | Age mean (years): 15.34<br>Male: 29.7%<br>Caucasian: 75%, African American :8% , Hispanic: 5%, Asian: 6%, Other: 6%                                                                                        |                                                  |
|                          |                                                            |                                | Control (N=43)                               | Attention Control or Treatment as Usual<br>Relaxation, Cognitive problem solving. A nonspecific counseling program, SFL, controlled for the attention and group involvement.    | Age mean (years): 15.37<br>Male: 37%<br>Caucasian: 67%, African American :2% , Hispanic: 14%, Asian: 7%, Other: 9%                                                                                         |                                                  |
| Yen, 2014 <sup>105</sup> | Taiwan<br>Non-Randomized comparative studies<br>Outpatient | GAD, SAD, SoP                  | Child CBT (N=30)                             | Coping cat<br>Child CBT- (parents included < 20%)<br>Individual based<br>Exposure<br>Relaxation<br>Cognitive problem solving<br>17 weekly sessions<br>Delivered by Psychologist | Age mean (years): 9.1 (range: 7-12)\<br>Males:40%                                                                                                                                                          | 0                                                |
|                          |                                                            |                                | Control (N=32)                               | Attention Control or Treatment as Usual                                                                                                                                         | Age mean (years): 9.5 (range: 7-12)<br>Males: 38%                                                                                                                                                          |                                                  |

ADHD: attention deficit hyperactivity disorder, CC: coping cat, CCC: child centered therapy, IAFS: intervencion en adolescentes con fobia social (treatment for adolescents with social phobia), CBT: cognitive behavioral therapy, CGI: clinical global impression scale, GAD: generalized anxiety disorder, NR: not reported, OCD: obsessive compulsive disorder, ODD: oppositional defiant disorder, PD: panic disorder, PTSD: post-traumatic stress disorder, RCT: randomized controlled trial, SAD: separation anxiety disorder, SASS: skills for academic social success, SET-C: social effectiveness therapy, SFL: skills for life, SoP: social anxiety, SP: specific phobia, SSRI: selective serotonin reuptake inhibitor. TAPS: treatment of anxiety and physical symptoms.

**eTable 7.** Characteristics of studies evaluating combination of CBT with medications vs CBT

| Author, Year                   | Study country, study design, type of study, study settings | Type of anxiety/Severity (CGI) | Intervention and comparisons (n of patients)                | Characteristics of interventions (psychotherapy: components, delivery model)/pharm: drug intensity, duration (weeks))                                                                                                            | Patient characteristics Age mean (years) (range) , male (%), race/ethnicity, comorbidity, household income, parent education, family dysfunction/stressor, treatment sequence, insurance, history of maltreatment) | Follow up after the end of intervention (weeks ) |
|--------------------------------|------------------------------------------------------------|--------------------------------|-------------------------------------------------------------|----------------------------------------------------------------------------------------------------------------------------------------------------------------------------------------------------------------------------------|--------------------------------------------------------------------------------------------------------------------------------------------------------------------------------------------------------------------|--------------------------------------------------|
| Bernstein, 2000 <sup>106</sup> | United States RCT Outpatient                               | SP                             | Combination therapy: CBT+ TCA: imipramine+ child CBT (N=31) | Generic CBT CBT protocol for school refusal, but each subject had an anxiety disorder Exposure, Individual-based 8, 45 to 60 min weekly sessions 25 mg bid. Delivered by 2 doctoral level psychologists a master level clinician | Age mean (years); 13.9<br>Male: 39.6%<br>Caucasian: 90%<br>African Americans: 7.9%<br>Hispanic: 1.5%                                                                                                               |                                                  |
|                                |                                                            |                                | Combination therapy Placebo Pill plus child CBT (N=31)      | Generic CBT CBT protocol for school refusal, but each subject had an anxiety disorder Exposure, Individual-based 8, 45 to 60 min weekly sessions level psychologists a master level clinician.                                   |                                                                                                                                                                                                                    |                                                  |
| Klein, 1992 <sup>107</sup>     | United States RCT Mental Health Clinic                     | SAD                            | TCA+ therapy: Imipramine plus child CBT (N=11)              | Other Medication+ Imipramine Exposure cognitive strategies max of 5 mg/kg/day plus weekly therapy session for 6 weeks                                                                                                            | Age mean (years): 9.5 (range:6-15)<br>Male: 67%<br>Caucasian: 100%                                                                                                                                                 | 0                                                |
|                                |                                                            |                                | Placebo Pill+ Child CBT (N=10)                              | Placebo plus exposure cognitive strategies max of 5 mg/kg/day plus weekly therapy session for 6 weeks                                                                                                                            |                                                                                                                                                                                                                    |                                                  |
| Melvin,                        | Australia                                                  | GAD                            | Child CBT                                                   | Other Therapy                                                                                                                                                                                                                    | Age mean (years): 14 (Range: 11-                                                                                                                                                                                   | 52                                               |

| Author, Year                  | Study country, study design, type of study, study settings | Type of anxiety/Severity (CGI) | Intervention and comparisons (n of patients)                             | Characteristics of interventions (psychotherapy: components, delivery model)/pharm: drug intensity, duration (weeks))                                                                                                        | Patient characteristics Age mean (years) (range) , male (%), race/ethnicity, comorbidity, household income, parent education, family dysfunction/stressor, treatment sequence, insurance, history of maltreatment) | Follow up after the end of intervention (weeks ) |
|-------------------------------|------------------------------------------------------------|--------------------------------|--------------------------------------------------------------------------|------------------------------------------------------------------------------------------------------------------------------------------------------------------------------------------------------------------------------|--------------------------------------------------------------------------------------------------------------------------------------------------------------------------------------------------------------------|--------------------------------------------------|
| 2016 <sup>108</sup>           | RCT<br>Mental Health Clinic                                | SAD<br>SoP                     | plus separate parent intervention (N=20)                                 | Exposure, Relaxation, Cognitive Problem Solving<br>Individual based<br>Psychologist , masters level clinician and Student/trainee<br>24, 50-60min sessions, bi weekly and then weekly                                        | 16.5)<br>Males: 50%<br>Caucasian: 94%<br>Asian: 6%                                                                                                                                                                 |                                                  |
|                               |                                                            |                                | Child CBT plus separate parent intervention + Pill Placebo (N=21)        | Other Therapy + Pill Placebo<br>Exposure, Relaxation, Cognitive Problem Solving<br>Individual based<br>Psychologist , masters level clinician and Student/trainee<br>24, 50-60min sessions, bi weekly and then weekly        | Age mean (years): 13.4<br>(Range:11-16.5)<br>Males: 48%<br>Caucasian: 94%<br>Asian: 6%                                                                                                                             |                                                  |
|                               |                                                            |                                | Child CBT plus separate parent intervention plus SSRI: Fluoxetine (N=21) | Other Therapy + SSRI:<br>Fluoxetine<br>Exposure, Relaxation, Cognitive Problem Solving<br>Individual based<br>Psychologist , masters level clinician and Student/trainee<br>24, 50-60min sessions, bi weekly and then weekly | Age mean (years): 13.3<br>(Range:11-16.5)<br>Males: 66%<br>Caucasian: 94%<br>Asian: 6%                                                                                                                             |                                                  |
| Walkup, 2008 <sup>17-23</sup> | United States<br>RCT<br>Outpatient                         | GAD,SAD, SoP                   | Child CBT (N=139)                                                        | Coping Cat<br>Child CBT (parents included <20%)<br>Individual-based., Exposure, relaxation, cognitive problem solving.<br>60-minute session once a week                                                                      | Age mean (years): 10.5<br>Male: 49.2%<br>Caucasian: 76.3%, African American:10.1%, Hispanic: 9.2%, other: 4.5%<br>Low income: 23.7%<br>ADHD: 11.5%, ODD:13.8%, Tic                                                 | 0                                                |

| Author, Year | Study country, study design, type of study, study settings | Type of anxiety/Severity (CGI) | Intervention and comparisons (n of patients)                  | Characteristics of interventions (psychotherapy: components, delivery model)/pharm: drug intensity, duration (weeks))                                                                                                    | Patient characteristics Age mean (years) (range) , male (%), race/ethnicity, comorbidity, household income, parent education, family dysfunction/stressor, treatment sequence, insurance, history of maltreatment) | Follow up after the end of intervention (weeks) |
|--------------|------------------------------------------------------------|--------------------------------|---------------------------------------------------------------|--------------------------------------------------------------------------------------------------------------------------------------------------------------------------------------------------------------------------|--------------------------------------------------------------------------------------------------------------------------------------------------------------------------------------------------------------------|-------------------------------------------------|
|              |                                                            |                                |                                                               | for 12 weeks.                                                                                                                                                                                                            | disorder and other internalizing disorders: 41.7%                                                                                                                                                                  |                                                 |
|              |                                                            |                                | SSRI: Sertraline (N=133)                                      | Beginning with 25mg/day Up to 200 mg/day by 8 <sup>th</sup> week, for 12 weeks.                                                                                                                                          | Age mean (years): 10.8<br>Male: 51.1%<br>Caucasian: 77.4%, African American: 9%, Hispanic: 11.3%, other: 2.3%<br>Low income: 26.3%<br>ADHD: 12.7%, ODD:8.2%, Tic disorder and other internalizing disorders: 55.6% |                                                 |
|              |                                                            |                                | Combination therapy: CBT+ SSRI: Child CBT+ Sertraline (N=140) | Coping Cat, Child CBT (parents included <20%)<br>Individual-based, Exposure, relaxation and cognitive problem solving plus Sertraline.<br>60-minute session once a week for 12 weeks plus up to 200 mg/day for 12 weeks. | Age mean (years): 10.7<br>Male: 49.6%<br>Caucasian: 82.9%, African American: 7.9%, Hispanic: 5.6%, other: 3.6%<br>Low income: 25.0%<br>ADHD: 11.4%, ODD:10%, Tic disorder and other internalizing disorders: 42.8% |                                                 |
|              |                                                            |                                | Control (N=76)                                                | Pill Placebo                                                                                                                                                                                                             | Age mean (years): 10.6<br>Male : 51.3%<br>Caucasian: 79%, African American: 9%, Hispanic: 9%, other: 3%<br>Low income: 27.6%<br>ADHD: 11.8%, ODD:9.2%, Tic disorder and other internalizing disorders: 44.7%       |                                                 |

ADHD: attention deficit hyperactivity disorder, CBT: cognitive behavioral therapy, CGI: clinical global impression scale, GAD: generalized anxiety disorder, NR: not reported, ODD: oppositional defiant disorder, RCT: randomized controlled trial, SAD: separation anxiety disorder, SoP: social anxiety, SP: specific phobia, SSRI: selective serotonin reuptake inhibitor



**eTable 8.** Characteristics of single-cohort observational studies with adverse events

| Author, Year                   | Study country, study design, type of study, study settings | Type of anxiety/Severity (CGI)                             | Intervention and comparisons (n of patients) | Characteristics of interventions (psychotherapy: components, delivery model)/pharm: drug intensity, duration (weeks)) | Patient characteristics Age mean (years) (range) , male (%), race/ethnicity, comorbidity, household income, parent education, family dysfunction/stressor, treatment sequence, insurance, history of maltreatment) | Follow up after the end of intervention (weeks ) |
|--------------------------------|------------------------------------------------------------|------------------------------------------------------------|----------------------------------------------|-----------------------------------------------------------------------------------------------------------------------|--------------------------------------------------------------------------------------------------------------------------------------------------------------------------------------------------------------------|--------------------------------------------------|
| Biederman, 1987 <sup>109</sup> | United States<br>Case series/case report<br>Outpatient     | GAD, PD with agoraphobia, PD without agoraphobia, SAD, SoP | BCD:<br>Clonazepam (N=3)                     | 1 mg/day                                                                                                              | Age mean (years): 10 (range: 8-11)<br>Males: 66.6%<br>Caucasian: 100%                                                                                                                                              | 21.5-156                                         |
| Birmaher, 1994 <sup>110</sup>  | United States<br>Case series<br>Outpatient                 | SAD, SoP                                                   | SSRI:<br>Fluoxetine (N=21)                   | Mean dose of 25.7 mg/day for up to 43 weeks                                                                           | Age Range: ( 11- 17) years<br>Male: 55%<br>CGI>=6: 91%                                                                                                                                                             | 0                                                |
| Chavira, 2002 <sup>111</sup>   | United States<br>Case series/case report<br>Outpatient     | SoP, SP                                                    | SSRI:<br>Citalopram (N=12)                   | 100-40 mg/day for 12 weeks                                                                                            | Age mean (years): 13.42 (range: 8-17)<br>Males: 33.3%<br>Caucasian: 6%<br>African American: 8%<br>Hispanic: 16.6%<br>Others:25%<br>Mean CGI-S=4.82                                                                 | 52                                               |
| Chutko, 2011 <sup>112</sup>    | Kazakhstan<br>Case series<br>Outpatient                    | GAD                                                        | NMDA receptor antagonist<br>Mebicar (N=32)   | 1000 mg/day for 4 weeks                                                                                               | Age range: 7-14 years                                                                                                                                                                                              | 0                                                |
| Compton, 2001 <sup>113</sup>   | United States<br>RCT<br>Outpatient                         | SoP                                                        | SSRI:<br>Sertraline (N=14)                   | Maximum of 200 mg/day for 8 weeks                                                                                     | Age Range: (10-17) years<br>Males: 57%                                                                                                                                                                             | 0                                                |
| dAmato, 1962 <sup>114</sup>    | United States<br>Case series/case report                   | SP                                                         | BZD:<br>Chlordiazepoxide (N=9)               | 10-30mg/day for 1-4 weeks                                                                                             | Age range: 8-11 years<br>Males: 44%                                                                                                                                                                                | 0                                                |

| Author, Year                       | Study country, study design, type of study, study settings | Type of anxiety/Severity (CGI)         | Intervention and comparisons (n of patients) | Characteristics of interventions (psychotherapy: components, delivery model)/pharm: drug intensity, duration (weeks)) | Patient characteristics Age mean (years) (range) , male (%), race/ethnicity, comorbidity, household income, parent education, family dysfunction/stressor, treatment sequence, insurance, history of maltreatment) | Follow up after the end of intervention (weeks ) |
|------------------------------------|------------------------------------------------------------|----------------------------------------|----------------------------------------------|-----------------------------------------------------------------------------------------------------------------------|--------------------------------------------------------------------------------------------------------------------------------------------------------------------------------------------------------------------|--------------------------------------------------|
|                                    | Outpatient                                                 |                                        |                                              |                                                                                                                       |                                                                                                                                                                                                                    |                                                  |
| Dummit, 1996 <sup>115</sup>        | United States<br>Case series/case report<br>Outpatient     | GAD, SAD, SoP, SP                      | SSRI:<br>Fluoxetine<br>(N=21)                | 20-60 mg/day for 9 weeks                                                                                              | Age mean (years): 8.2 (range: 8-14)<br>Males: 24%<br>Caucasian: 90%<br>Asian: 9.5%<br>ODD: 5%<br>Learning disabilities: 14%<br>Enuresis: 5%<br>Trichotillomania: 5%                                                | 0                                                |
| Fairbanks, 1997 <sup>116</sup>     | United States<br>Case series/case report<br>Outpatient     | GAD, PD, PD with agoraphobia, SAD, SoP | SSRI:<br>Fluoxetine<br>(N=18)                | Oral, 20- 40mg/day (children) or 20-80mg/day (adolescents) for 9 weeks.                                               | Age mean (years): 11.9 (range: 9-17)<br>Caucasian: 55%<br>African American: 5%<br>Hispanic: 5%<br>Other: 5%<br>Body Dysmorphic Disorder: 5%                                                                        | 0                                                |
| Isolan, 2007 <sup>117</sup>        | Brazil<br>Case series<br>Mental Health Clinic              | GAD, SAD, SP, SoP.                     | SSRI:<br>Escitalopram<br>(N= 20)             | 10-20 mg/day for 12 weeks.                                                                                            | Age mean (years): 15 (Range 10 -17)<br>Male: 30%                                                                                                                                                                   | NR                                               |
| Karabekiroglu, 2011 <sup>118</sup> | Turkey<br>Case series<br>Outpatient                        | GAD,SAD, SoP, SP                       | SSRI:<br>Fluoxetine<br>(N=40)                | 12 weeks of treatment.                                                                                                | Age mean (years): 10.08 ( range: 7-17)<br>Male: 57%<br>ADHD: 7.5%, OCD : 2.5%, selective mutism: 2.5%                                                                                                              | 0                                                |
| Lepola, 1996 <sup>119</sup>        | Finland<br>Case series<br>Outpatient                       | PD with agoraphobia                    | SSRI:<br>Citalopram<br>(N=3)                 | 20mg/day for 34-64 weeks                                                                                              | Age range: 9-16 years<br>Males: 66.6%                                                                                                                                                                              | 0                                                |

| Author, Year                   | Study country, study design, type of study, study settings | Type of anxiety/Severity (CGI)                                 | Intervention and comparisons (n of patients)         | Characteristics of interventions (psychotherapy: components, delivery model)/pharm: drug intensity, duration (weeks)) | Patient characteristics Age mean (years) (range) , male (%), race/ethnicity, comorbidity, household income, parent education, family dysfunction/stressor, treatment sequence, insurance, history of maltreatment) | Follow up after the end of intervention (weeks ) |
|--------------------------------|------------------------------------------------------------|----------------------------------------------------------------|------------------------------------------------------|-----------------------------------------------------------------------------------------------------------------------|--------------------------------------------------------------------------------------------------------------------------------------------------------------------------------------------------------------------|--------------------------------------------------|
| Mancini, 1999 <sup>120</sup>   | Canada<br>Case series/<br>case report<br>Outpatient        | SoP                                                            | SSRI:<br>Paroxetine<br>(N=5)                         | 40 - 80 mg/day for 5-24 weeks                                                                                         | Age Range: 7-18 years<br>Males: 20%<br>OCD: 40%<br>Dysthymia: 40%                                                                                                                                                  | NR                                               |
|                                |                                                            |                                                                | SARI:<br>Nefazodone<br>(N=1)                         | 350 mg/day for 20 weeks                                                                                               | Age: 15<br>Males: 0%                                                                                                                                                                                               |                                                  |
|                                |                                                            |                                                                | SSRI:<br>Sertraline<br>(N=1)                         | 175 mg/day,                                                                                                           | Age: 17<br>Males: 0%<br>Depression: 100%<br>Dysthymia: 100%                                                                                                                                                        |                                                  |
| Masi, 2001 <sup>121</sup>      | Italy<br>Case series<br>Outpatient                         | GAD, PD with agoraphobia, PD without agoraphobia, SAD, SoP, SP | SSRI:<br>paroxetine<br>(N=18)                        | Average 23.9 mg/day<br>Daily for 2-24 weeks                                                                           | Age mean (years): 12.3 (range: 7-16)<br>Males: 66.6%<br>Depression: 22%<br>OCD: 22%<br>Tic Disorder: 11%                                                                                                           | 0                                                |
| Mrakotsky, 2008 <sup>122</sup> | United States<br>Open-label pilot<br>Outpatient            | SoP                                                            | Tetracyclic antidepressant:<br>Mirtazapine<br>(N=18) | 15-45 mg/day for 8 weeks                                                                                              | Age mean (years): 12.06 (range: 8-17)<br>Males: 50%<br>ODD: 5%<br>Depression: 10%                                                                                                                                  | NR                                               |
| Renaud, 1999 <sup>123</sup>    | United States<br>Case series<br>Outpatient                 | GAD, PD, SAD, SoP, SP                                          | SSRI<br>(N=12)                                       | 9 received fluoxetine (34.4 mg/day)<br>2 received paroxetine (20 mg/day)<br>1 received of sertraline (125 mg/day)     | Age mean (years): 12 (range: 7-17)<br>Males: 42%<br>Depression: 66.6%<br>Substance abuse: 8%<br>OCD: 8%                                                                                                            | 0                                                |
| Simeon, 1987 <sup>124</sup>    | Canada<br>Cross over                                       | GAD                                                            | BZD:<br>Alprazolam                                   | 0.5 mg to 1.5 mg/day                                                                                                  | Age mean (years):11.5 (Range: 8-14)                                                                                                                                                                                | 4                                                |

| Author, Year                | Study country, study design, type of study, study settings | Type of anxiety/Severity (CGI) | Intervention and comparisons (n of patients) | Characteristics of interventions (psychotherapy: components, delivery model)/pharm: drug intensity, duration (weeks)) | Patient characteristics Age mean (years) (range) , male (%), race/ethnicity, comorbidity, household income, parent education, family dysfunction/stressor, treatment sequence, insurance, history of maltreatment) | Follow up after the end of intervention (weeks ) |
|-----------------------------|------------------------------------------------------------|--------------------------------|----------------------------------------------|-----------------------------------------------------------------------------------------------------------------------|--------------------------------------------------------------------------------------------------------------------------------------------------------------------------------------------------------------------|--------------------------------------------------|
|                             | study<br>Outpatient                                        |                                | (N=12)                                       |                                                                                                                       | Males: 90%<br>Caucasian: 100%                                                                                                                                                                                      |                                                  |
| Simeon, 1994 <sup>125</sup> | Canada<br>Case series<br>Outpatient                        | GAD, SAD                       | Buspirone<br>(N=15)                          | NR                                                                                                                    | Age mean (years): 10 (range: 6-14)<br>Males: 66.6%<br>ADHD: 27%<br>Avoidant disorder: 7%                                                                                                                           | 0                                                |
| Zwier, 1993 <sup>126</sup>  | United States<br>Case series/case report<br>Inpatient      | SoP                            | Buspirone<br>(N=1)                           | 20 mg/day for 52 weeks                                                                                                | Age: 16<br>Males: 100%<br>Caucasian 100%                                                                                                                                                                           | 0                                                |

ADHD: attention deficit hyperactivity disorder, CGI: clinical global impression scale, GAD: generalized anxiety disorder, NMDA receptor: N-methyl-D-aspartate receptor, NR: not reported, OCD: obsessive compulsive disorder, ODD: oppositional defiant disorder, PD: panic disorder, SAD: separation anxiety disorder, SARI: serotonin antagonist reuptake inhibitor, SNRI: serotonin–norepinephrine reuptake inhibitor, SoP: social anxiety, SP: specific phobia, SRI: serotonin reuptake inhibitor, SSRI: selective serotonin reuptake inhibitor

**eTable 9.** Pooled effect size and quality of evidence for primary anxiety symptoms (measured by clinician, child, and parent)

| Comparison                                    | Outcome                           | Conclusion                                                | Study design and sample size <sup>1</sup>                      | Factors that affect the quality of evidence <sup>2</sup> | Overall quality of evidence |
|-----------------------------------------------|-----------------------------------|-----------------------------------------------------------|----------------------------------------------------------------|----------------------------------------------------------|-----------------------------|
| <b>Medication classes versus pill placebo</b> |                                   |                                                           |                                                                |                                                          |                             |
| Benzodiazepine vs. Pill Placebo               | Primary Anxiety, Clinician report | SMD: 0.30; 95% CI: -0.72 to 1.32; I <sup>2</sup> =N/A     | 1 RCT (15 Patients) <sup>7</sup>                               | Severe imprecision (small sample size and wide CIs)      | Low                         |
| SNRI vs. Pill Placebo                         | Primary Anxiety, Child report     | SMD: -2.14; 95% CI: -9.75 to 5.48; I <sup>2</sup> = 99.4% | 3 RCTs (622 Patients) <sup>5,8,13</sup>                        | Severe imprecision (very wide CIs) and inconsistency     | Insufficient                |
|                                               | Primary Anxiety, Parent report    | SMD: -0.32; 95% CI: -0.63 to 0.00; I <sup>2</sup> =N/A    | 1 RCT (153 Patients) <sup>13</sup>                             | Severe imprecision (small sample size and wide CIs)      | Low                         |
|                                               | Primary Anxiety, Clinician report | SMD: -0.45; 95% CI: -0.81 to -0.10; I <sup>2</sup> =0.0%  | 3 RCTs (601 Patients) <sup>5,13,14</sup>                       | None                                                     | High                        |
| SSRI vs. Pill Placebo                         | Primary Anxiety, Child report     | SMD: -0.42; 95% CI: -0.96 to 0.12; I <sup>2</sup> =27.5%  | 4 RCTs (197 Patients) <sup>3,4,12,15,24</sup>                  | Severe imprecision (small sample size and wide CIs)      | Low                         |
|                                               | Primary Anxiety, Parent report    | SMD: -0.61; 95% CI: -1.03 to -0.20; I <sup>2</sup> =55.1% | 2 RCTs (96 Patients) <sup>3,12</sup>                           | Imprecision (small sample size)                          | Moderate                    |
|                                               | Primary Anxiety, Clinician report | SMD: -0.65; 95% CI: -1.10 to -0.21; I <sup>2</sup> =73.4% | 7 RCTs (675 Patients) <sup>1,3,4,9,12,15,17,18,20-24,127</sup> | Inconsistency                                            | Moderate                    |
|                                               | Remission                         | RR: 2.04; 95% CI: 1.37 to 3.04; I <sup>2</sup> =N/A       | 2 RCTs (95 Patients) <sup>3,4</sup>                            | Imprecision small sample size)                           | Moderate                    |
|                                               | Response                          | RR: 1.96; 95% CI: 1.60 to 2.40; I <sup>2</sup> =0.0%      | 2 RCTs (396 Patients) <sup>3,15</sup>                          | Imprecision (small sample size)                          | Moderate                    |
| TCA vs. Pill Placebo                          | Primary Anxiety, Child report     | SMD: 0.36; 95% CI: -0.27 to 0.99; I <sup>2</sup> =45.6%   | 2 RCTs (41 Patients) <sup>4,107</sup>                          | Severe imprecision (small sample size and                | Low                         |

| Comparison                                 | Outcome                           | Conclusion                                               | Study design and sample size <sup>1</sup> | Factors that affect the quality of evidence <sup>2</sup>                       | Overall quality of evidence |
|--------------------------------------------|-----------------------------------|----------------------------------------------------------|-------------------------------------------|--------------------------------------------------------------------------------|-----------------------------|
|                                            |                                   |                                                          |                                           | wide CIs).                                                                     |                             |
|                                            | Primary Anxiety, Parent report    | SMD: 0.46; 95% CI: -0.41 to 1.33; I <sup>2</sup> =N/A    | 1 RCT (21 Patients) <sup>107</sup>        | Methodological limitations, severe imprecision (small sample size and wide CI) | Insufficient                |
|                                            | Remission                         | RR: 1.83; 95% CI: 0.74 to 4.55; I <sup>2</sup> =N/A      | 1 RCT (20 Patients) <sup>4</sup>          | Severe imprecision (small sample size and wide CIs)                            | Low                         |
|                                            | Response                          | RR: 1.72; 95% CI: 1.01 to 2.91; I <sup>2</sup> =N/A      | 1 RCT (35 Patients) <sup>6</sup>          | Severe imprecision (small sample size and wide CIs)                            | Low                         |
| <b>Medications versus pill placebo</b>     |                                   |                                                          |                                           |                                                                                |                             |
| Atomoxetine (class: SNRI) vs. Pill Placebo | Primary Anxiety, Child report     | SMD: -0.29; 95% CI: -0.51 to -0.08; I <sup>2</sup> =0.0% | 2 RCTs (331 Patients) <sup>5,13</sup>     | Imprecision (small sample size)                                                | Moderate                    |
|                                            | Primary Anxiety, Clinician report | SMD: -0.56; 95% CI: -0.78 to -0.34; I <sup>2</sup> =0.0% | 2 RCTs (331 Patients) <sup>5,13</sup>     | Imprecision (small sample size)                                                | Moderate                    |
|                                            | Primary Anxiety, Parent report    | SMD: -0.23; 95% CI: -0.55 to 0.08; I <sup>2</sup> = N/A  | 1 RCT (155 Patients) <sup>13</sup>        | Severe imprecision (small sample size and wide CIs)                            | Low                         |
| Clomipramine (class: TCA) vs. Pill Placebo | Primary Anxiety, Child report     | SMD: -0.07; 95% CI: -0.95 to 0.81; I <sup>2</sup> =N/A   | 1 RCT (19 Patients) <sup>4</sup>          | Severe imprecision (small sample size and wide CIs)                            | Low                         |
| Duloxetine (class: SNRI) vs. Pill Placebo  | Primary Anxiety, Clinician report | SMD: -0.43; 95% CI: -0.67 to -0.19; I <sup>2</sup> =N/A  | 1 RCT (272 Patients) <sup>14</sup>        | Imprecision (small sample size)                                                | Moderate                    |
| Fluoxetine (class: SSRI) vs. Pill Placebo  | Primary Anxiety, Child report     | SMD:-0.38; 95% CI: -1.26 to 0.50; I <sup>2</sup> =43.3%  | 2 RCTs (154 Patients) <sup>3,4,24</sup>   | Severe imprecision (wide CIs and small sample size)                            | Low                         |
|                                            | Primary Anxiety,                  | SMD:-0.46; 95%                                           | 1 RCT (74 Patients) <sup>3</sup>          | Severe                                                                         | Low                         |

| Comparison                                 | Outcome                           | Conclusion                                                | Study design and sample size <sup>1</sup> | Factors that affect the quality of evidence <sup>2</sup>                       | Overall quality of evidence |
|--------------------------------------------|-----------------------------------|-----------------------------------------------------------|-------------------------------------------|--------------------------------------------------------------------------------|-----------------------------|
|                                            | Parent report                     | CI: -0.92 to 0.01; I <sup>2</sup> =N/A                    |                                           | imprecision (wide CIs and small sample size)                                   |                             |
|                                            | Primary Anxiety, Clinician report | SMD:-0.40; 95% CI: -0.72 to -0.01; I <sup>2</sup> =N/A    | 2 RCTs (154 Patients) <sup>3,24</sup>     | Severe imprecision (wide CIs and small sample size)                            | Low                         |
|                                            | Remission                         | RR: 2.04; 95% CI: 1.32 to 3.04; I <sup>2</sup> =N/A       | 2 RCTs (95 Patients) <sup>3,4</sup>       | Imprecision (small sample size)                                                | Moderate                    |
|                                            | Response                          | RR: 1.70; 95% CI: 1.01 to 2.82; I <sup>2</sup> =0.0%      | 1 RCT (74 Patients) <sup>3</sup>          | Severe imprecision (wide CIs and small sample size)                            | Low                         |
| Fluvoxamine (class: SSRI) vs. Pill Placebo | Primary Anxiety, Clinician report | SMD: -0.97; 95% CI: -1.31 to -0.63; I <sup>2</sup> =69.1% | 2 RCTs (153 Patients) <sup>1,9</sup>      | Imprecision (small sample size) and inconsistency                              | Low                         |
| Imipramine (class: TCA) vs. Pill Placebo   | Primary Anxiety, Child report     | SMD: 0.80; 95% CI: -0.10 to 1.70; I <sup>2</sup> =N/A     | 1 RCT (21 Patients) <sup>107</sup>        | Methodological limitations, severe imprecision (small sample size and wide CI) | Insufficient                |
|                                            | Primary Anxiety, Parent report    | SMD: 0.46; 95% CI: -0.41 to 1.33; I <sup>2</sup> =N/A     | 1 RCT (21 Patients) <sup>107</sup>        | Methodological limitations, severe imprecision (small sample size and wide CI) | Insufficient                |
| Paroxetine (class: SSRI) vs. Pill Placebo  | Primary Anxiety, Clinician report | SMD: -0.71; 95% CI: -1.06 to -0.37; I <sup>2</sup> =N/A   | 1 RCT (137 Patients) <sup>15</sup>        | Imprecision (small sample size)                                                | Moderate                    |
|                                            | Response                          | RR: 2.02; 95% CI:1.62 to 2.51; I <sup>2</sup> =N/A        | 1 RCT (322 Patients) <sup>15</sup>        | Imprecision (small sample size)                                                | Moderate                    |
| Sertraline (class: SSRI) vs. Pill Placebo  | Primary Anxiety, Child report     | SMD: -0.75; 95% CI: -1.62 to 0.12; I <sup>2</sup> =N/A    | 1 RCT (22 patients) <sup>12</sup>         | Severe imprecision (wide CIs and small sample size)                            | Low                         |

| Comparison                                                            | Outcome                           | Conclusion                                                | Study design and sample size <sup>1</sup>           | Factors that affect the quality of evidence <sup>2</sup> | Overall quality of evidence |
|-----------------------------------------------------------------------|-----------------------------------|-----------------------------------------------------------|-----------------------------------------------------|----------------------------------------------------------|-----------------------------|
|                                                                       | Primary Anxiety, Parent report    | SMD: -1.24; 95% CI: -2.16 to -0.32; I <sup>2</sup> =N/A   | 1 RCT (22 Patients) <sup>12</sup>                   | Severe imprecision (wide CIs and small sample size)      | Low                         |
|                                                                       | Primary Anxiety, Clinician report | SMD: -0.71; 95% CI: -0.99 to -0.42; I <sup>2</sup> =89.9% | 2 RCTs (231 Patients) <sup>12,17,18,20-23,127</sup> | Imprecision (small sample size), inconsistency           | Low                         |
| Venlafaxine (class: SNRI) vs. Pill Placebo                            | Primary Anxiety, Child report     | SMD: -1.96; 95% CI: -2.23 to -1.64; I <sup>2</sup> =99.6% | 2 RCTs (443 Patients) <sup>8,13</sup>               | Inconsistency                                            | Moderate                    |
|                                                                       | Primary Anxiety, Parent report    | SMD: -0.32; 95% CI: -0.63 to 0.00; I <sup>2</sup> =N/A    | 1 RCT (153 Patients) <sup>13</sup>                  | Severe imprecision (wide CIs and small sample size)      | Low                         |
|                                                                       | Primary Anxiety, Clinician report | SMD: -0.42; 95% CI: -0.74 to -0.10; I <sup>2</sup> =N/A   | 1 RCT (153 Patients) <sup>13</sup>                  | Imprecision (small sample size)                          | Moderate                    |
| Clonazepam (class: Benzodiazepine) vs. Pill Placebo                   | Primary Anxiety, Clinician report | SMD: 0.30; 95% CI: -0.72 to 1.32; I <sup>2</sup> =N/A     | 1 RCT (15 Patients) <sup>7</sup>                    | Severe imprecision (wide CIs and small sample size)      | Low                         |
| Venlafaxine (class: SNRI) vs. Attention Control or Treatment As Usual | Primary Anxiety, Child report     | SMD: -0.40; 95% CI: -0.72 to -0.09; I <sup>2</sup> =N/A   | 1 RCT (158 Patients) <sup>13</sup>                  | Imprecision (small sample size)                          | Moderate                    |
|                                                                       | Primary Anxiety, Parent report    | SMD: -0.42; 95% CI: -0.73 to -0.10; I <sup>2</sup> =N/A   | 1 RCT (158 Patients) <sup>13</sup>                  | Imprecision (small sample size)                          | Moderate                    |
|                                                                       | Primary Anxiety, Clinician report | SMD: -0.09; 95% CI: -0.40 to 0.22; I <sup>2</sup> =N/A    | 1 RCT (158 Patients) <sup>13</sup>                  | Severe imprecision (wide CIs and small sample size)      | Low                         |
| Atomoxetine (class: SNRI) vs. Attention Control or Treatment As Usual | Primary Anxiety, Child report     | SMD: -0.26; 95% CI: -0.57 to 0.05; I <sup>2</sup> =N/A    | 1 RCT (154 Patients) <sup>13</sup>                  | Severe imprecision (wide CIs and small sample size)      | Low                         |
|                                                                       | Primary Anxiety, Parent report    | SMD: -0.34; 95% CI: -0.65 to -                            | 1 RCT (154 Patients) <sup>13</sup>                  | Severe imprecision (wide                                 | Low                         |



| Comparison                                              | Outcome                           | Conclusion                                              | Study design and sample size <sup>1</sup>       | Factors that affect the quality of evidence <sup>2</sup> | Overall quality of evidence |
|---------------------------------------------------------|-----------------------------------|---------------------------------------------------------|-------------------------------------------------|----------------------------------------------------------|-----------------------------|
|                                                         |                                   | 0.03; I <sup>2</sup> =N/A                               |                                                 | CIs and small sample size)                               |                             |
|                                                         | Primary Anxiety, Clinician report | SMD: -0.33; 95% CI: -0.65 to -0.02; I <sup>2</sup> =N/A | 1 RCT (154 Patients) <sup>13</sup>              | Severe imprecision (wide CIs and small sample size)      | Low                         |
| <b>Medications versus medications</b>                   |                                   |                                                         |                                                 |                                                          |                             |
| Fluoxetine (class: SSRI) vs. Clomipramine (class: TCA)  | Primary Anxiety, Child report     | SMD: -1.01; 95% CI: -2.02 to -0.09; I <sup>2</sup> =N/A | 1 RCT (19 Patients) <sup>4</sup>                | Severe imprecision (wide CIs and small sample size)      | Low                         |
|                                                         | Remission                         | RR: 1.20; 95% CI: 0.69 to 2.09; I <sup>2</sup> =N/A     | 1 RCT (19 Patients) <sup>4</sup>                | Severe imprecision (wide CIs and small sample size)      | Low                         |
| Venlafaxine (class: SNRI) vs. Atomoxetine (class: SNRI) | Primary Anxiety, Child report     | SMD: -0.12; 95% CI: -0.43 to 0.20; I <sup>2</sup> =N/A  | 1 RCT (154 Patients) <sup>13</sup>              | Severe imprecision (wide CIs and small sample size)      | Low                         |
|                                                         | Primary Anxiety, Parent report    | SMD: -0.08; 95% CI: -0.39 to 0.24; I <sup>2</sup> =N/A  | 1 RCT (154 Patients) <sup>13</sup>              | Severe imprecision (wide CIs and small sample size)      | Low                         |
|                                                         | Primary Anxiety, Clinician report | SMD: 0.25; 95% CI: -0.07 to 0.57 I <sup>2</sup> =N/A    | 1 RCT (154 Patients) <sup>13</sup>              | Severe imprecision (wide CIs and small sample size)      | Low                         |
| <b>Medications versus CBT</b>                           |                                   |                                                         |                                                 |                                                          |                             |
| Fluoxetine (class: SSRI) vs. CBT                        | Primary Anxiety, Child report     | SMD:-0.16; 95% CI: -0.55 to 0.24; I <sup>2</sup> =N/A   | 1 RCT (102 Patients) <sup>24</sup>              | Severe imprecision (wide CIs and small sample size)      | Low                         |
|                                                         | Primary Anxiety, Clinician report | SMD:0.78; 95% CI:0.37 to 1.18; I <sup>2</sup> =N/A      | 1 RCT (102 Patients) <sup>24</sup>              | Imprecision (small sample size)                          | Moderate                    |
| Sertraline (class: SSRI) vs. CBT                        | Primary Anxiety, Clinician report | SMD: -0.15; 95% CI: -0.31 to 0.02; I <sup>2</sup> = N/A | 1 RCT (272 Patients) <sup>17,18,20-23,127</sup> | Severe imprecision (wide CIs and small sample size)      | Low                         |
|                                                         | Remission                         | RR: 1.00; 95% CI: 0.77 to 1.29; I <sup>2</sup> =N/A     | 1 RCT (272 Patients) <sup>17,18,20-23,127</sup> | Severe imprecision (wide CIs and small sample size)      | Low                         |
|                                                         | Response                          | RR: 0.92; 95% CI: 0.75 to 1.13;                         | 1 RCT (272 Patients) <sup>17,18,20-23,127</sup> | Severe imprecision (wide CIs and                         | Low                         |

| Comparison                                                                                        | Outcome                           | Conclusion                                                | Study design and sample size <sup>1</sup>                                                                                                               | Factors that affect the quality of evidence <sup>2</sup>                   | Overall quality of evidence |
|---------------------------------------------------------------------------------------------------|-----------------------------------|-----------------------------------------------------------|---------------------------------------------------------------------------------------------------------------------------------------------------------|----------------------------------------------------------------------------|-----------------------------|
|                                                                                                   |                                   | I <sup>2</sup> =N/A                                       |                                                                                                                                                         | small sample size)                                                         |                             |
| <b>CBT versus pill placebo, waitlisting/no treatment, or attention control/treatment as usual</b> |                                   |                                                           |                                                                                                                                                         |                                                                            |                             |
| CBT vs. Pill Placebo                                                                              | Primary Anxiety, Child report     | SMD: -0.22; 95% CI: -0.64 to 0.19; I <sup>2</sup> =N/A    | 1 RCT (96 Patients) <sup>24</sup>                                                                                                                       | Severe imprecision (wide CIs and small sample size)                        | Low                         |
|                                                                                                   | Primary Anxiety, Clinician report | SMD: -0.61; 95% CI: -0.85 to -0.37; I <sup>2</sup> =89.1% | 2 RCTs (311 Patients) <sup>17,18,20-24,127</sup>                                                                                                        | Methodological limitations, inconsistency, imprecision (small sample size) | Insufficient                |
| CBT vs. Waitlisting or No Treatment                                                               | Primary Anxiety, Child report     | SMD: -0.77; 95% CI: -1.06 to -0.47; I <sup>2</sup> =86.5% | 41 RCTs, 2 non-randomized comparative studies (2,297 Patients) <sup>26-30,33-35,37-40,43-45,47-55,60-67,69-72,74-79,82,83,85,128</sup>                  | Inconsistency <sup>3</sup>                                                 | Moderate                    |
|                                                                                                   | Primary Anxiety, Parent report    | SMD: -0.88; 95% CI: -1.23 to -0.54; I <sup>2</sup> =81.2% | 27 RCTs 2 non-randomized comparative studies (1,540 Patients) <sup>25-27,33,34,37-39,45-49,51-53,57,58,61,64-67,69,74,76,78,79,82,83,85</sup>           | Inconsistency <sup>3</sup>                                                 | Moderate                    |
|                                                                                                   | Primary Anxiety, Clinician report | SMD: -1.38; 95% CI: -1.95 to -0.81; I <sup>2</sup> =88.3% | 32 RCTs, 2 non-randomized comparative studies (1,926 Patients) <sup>27,28,30,34,35,37,40,41,43-46,49,51,52,54,57,58,60,62,64,66,69-72,76-82,84,85</sup> | Inconsistency <sup>3</sup>                                                 | Moderate                    |
|                                                                                                   | Remission                         | RR: 4.08; 95% CI: 1.05 to 15.80; I <sup>2</sup> =80.8%    | 7 RCTs (307 Patients) <sup>29,34,42,45,61,69,80</sup>                                                                                                   | Imprecision (small sample size), inconsistency                             | Low                         |
|                                                                                                   | Response                          | RR: 4.72; 95% CI: 2.39 to 9.32; I <sup>2</sup> =80.4%     | 14 RCTs (733 Patients) <sup>38,39,44-46,48,51-53,62,64,70,76,77,80,81,93</sup>                                                                          | Inconsistency                                                              | Moderate                    |
| CBT vs. Attention Control or Treatment As Usual                                                   | Primary Anxiety, Child report     | SMD:-0.36; 95% CI: -0.67 to -0.05; I <sup>2</sup> =60.5%  | 12 RCTs, 1 non-randomized comparative study(704 Patients) <sup>86,87,90-92,94-96,99-101,104,105</sup>                                                   | Borderline imprecision and inconsistency                                   | Moderate                    |
|                                                                                                   | Primary Anxiety Clinician report  | SMD:-0.11; 95% CI: -0.36 to 0.14; I <sup>2</sup> =28.6%   | 9 RCTs (486 Patients) <sup>87-90,94,98,99,102,104</sup>                                                                                                 | Methodological limitations and imprecision (wide                           | Low                         |

| Comparison                             | Outcome                           | Conclusion                                              | Study design and sample size <sup>1</sup>                                                          | Factors that affect the quality of evidence <sup>2</sup>                                       | Overall quality of evidence |
|----------------------------------------|-----------------------------------|---------------------------------------------------------|----------------------------------------------------------------------------------------------------|------------------------------------------------------------------------------------------------|-----------------------------|
|                                        |                                   |                                                         |                                                                                                    | CIs)                                                                                           |                             |
|                                        | Primary Anxiety, Parent report    | SMD: 0.04; 95% CI: -0.17 to 0.24; I <sup>2</sup> =0.0%  | 7 RCTs, 1 non-randomized comparative study (533 Patients) <sup>87,89,90,92,93,96,102,104,105</sup> | Methodological limitations, imprecision (wide CIs)                                             | Low                         |
|                                        | Remission                         | RR: 1.51; 95% CI: 0.95 to 2.40; I <sup>2</sup> =0.0%    | 4 RCTs (366 Patients) <sup>87,90,103,104</sup>                                                     | severe imprecision (small sample size and wide CIs)                                            | Low                         |
|                                        | Response                          | RR:1.90, 95% CI: 0.68 to 5.30; I <sup>2</sup> =67.2%    | 5 RCTs (374 Patients) <sup>87,90,92,93,96,104</sup>                                                | Methodological limitations, severe imprecision (small sample size and wide CIs), inconsistency | Insufficient                |
| <b>CBT combined with medications</b>   |                                   |                                                         |                                                                                                    |                                                                                                |                             |
| Imipramine (class: TCA) + CBT vs. CBT  | Primary Anxiety, Child report     | SMD: -0.74; 95% CI: -1.26 to -0.23; I <sup>2</sup> =N/A | 1 RCT (63 Patients) <sup>106</sup>                                                                 | Imprecision (small sample size)                                                                | Moderate                    |
|                                        | Primary Anxiety, Clinician report | SMD: -0.61; 95% CI: -1.11 to 0.10; I <sup>2</sup> =N/A  | 1 RCT (63 Patients) <sup>106</sup>                                                                 | Severe imprecision (small sample size and wide CI)                                             | Low                         |
|                                        | Response                          | RR: 1.71; 96% CI: 0.69 to 4.24; I <sup>2</sup> =N/A     | 1 RCT (41 Patients) <sup>108</sup>                                                                 | Severe imprecision (small sample size and wide CI)                                             | Low                         |
|                                        | Remission                         | RR: 0.24; 95% CI: 0.06 to 0.99; I <sup>2</sup> =N/A     | 1 RCT (41 Patients) <sup>108</sup>                                                                 | Severe imprecision (small sample size and wide CI)                                             | Low                         |
| CBT + Sertraline (class: SSRI) vs. CBT | Primary Anxiety, Clinician report | SMD: -0.69; 95% CI: -0.93 to -0.45; I <sup>2</sup> =N/A | 1 RCT (279 Patients) <sup>17,18,20-23,127</sup>                                                    | Imprecision (small sample size)                                                                | Moderate                    |
|                                        | Remission                         | RR: 1.51; 95% CI: 1.22 to 1.86; I <sup>2</sup> =N/A     | 1 RCT (279 Patients) <sup>17,18,20-23,127</sup>                                                    | Imprecision (small sample size)                                                                | Moderate                    |

| Comparison                                                 | Outcome                           | Conclusion                                                 | Study design and sample size <sup>1</sup>       | Factors that affect the quality of evidence <sup>2</sup> | Overall quality of evidence |
|------------------------------------------------------------|-----------------------------------|------------------------------------------------------------|-------------------------------------------------|----------------------------------------------------------|-----------------------------|
|                                                            | Response                          | RR: 1.35; 95%<br>CI: 1.15 to 1.58;<br>I <sup>2</sup> =N/A  | 1 RCT (279 Patients) <sup>17,18,20-23,127</sup> | Imprecision (small sample size)                          | Moderate                    |
| CBT+ Sertraline (class: SSRI) vs. Sertraline (class: SSRI) | Primary Anxiety, Clinician report | SMD: -0.46; 95%<br>CI: -0.70 to -0.22; I <sup>2</sup> =N/A | 1 RCT (273 Patients) <sup>17,18,20-23,127</sup> | Imprecision (small sample size)                          | Moderate                    |
|                                                            | Remission                         | RR: 1.51; 95%<br>CI: 1.22 to 1.87;<br>I <sup>2</sup> =N/A  | 1 RCT (273 Patients) <sup>17,18,20-23,127</sup> | Imprecision (small sample size)                          | Moderate                    |
|                                                            | Response                          | RR: 1.47; 95%<br>CI: 1.24 to 1.75;<br>I <sup>2</sup> =N/A  | 1 RCT (273 Patients) <sup>17,18,20-23,127</sup> | Imprecision (small sample size)                          | Moderate                    |

CBT: cognitive behavioral therapy, CI: confidence interval, N/A: not applicable, RCT: randomized control trial, RR: relative risk, SMD: standardized mean difference, SNRI: serotonin–norepinephrine reuptake inhibitor, SSRI: selective serotonin reuptake inhibitor, TCA: tricyclic antidepressants.

<sup>1</sup>The sample size includes the number of patients from each comparison.

<sup>2</sup>Only QOE domains that led to rating down QOE are reported in this column. Domains that are not reported were satisfactory.

**eTable 10.** Pairwise comparison for primary anxiety symptoms (clinician report) by medication class\*

|              |                    |                     |                                      |                          |                     |                    |                    |                     |
|--------------|--------------------|---------------------|--------------------------------------|--------------------------|---------------------|--------------------|--------------------|---------------------|
| Pill Placebo | -1.34 (-3.20,0.51) | -1.17 (-2.18,-0.16) | -0.31 (-1.15,0.53)                   | 0.39 (-0.43,1.21)        | -0.74 (-1.51,0.02)  | 0.28 (-1.63,2.19)  | -0.45 (-1.36,0.46) | -0.72 (-1.31,-0.12) |
|              | TCA+CBT            | 0.17 (-1.82,2.16)   | 1.03 (-0.73,2.79)                    | 1.73 (0.01,3.45)         | 0.60 (-1.09,2.29)   | 1.62 (-1.04,4.28)  | 0.89 (-1.12,2.91)  | 0.63 (-1.25,2.50)   |
|              |                    | SSRI+CBT            | 0.86 (-0.28,2.00)                    | 1.56 (0.46,2.66)         | 0.43 (-0.63,1.49)   | 1.45 (-0.71,3.61)  | 0.72 (-0.61,2.05)  | 0.45 (-0.57,1.48)   |
|              |                    |                     | Attention control/treatment as usual | 0.70 (0.12,1.28)         | -0.43 (-0.93,0.06)  | 0.59 (-1.49,2.67)  | -0.14 (-1.26,0.98) | -0.41 (-1.30,0.49)  |
|              |                    |                     |                                      | Waitlisting/no treatment | -1.13 (-1.44,-0.82) | -0.11 (-2.18,1.97) | -0.84 (-1.98,0.30) | -1.10 (-1.97,-0.24) |
|              |                    |                     |                                      |                          | CBT                 | 1.02 (-1.03,3.08)  | 0.30 (-0.80,1.39)  | 0.03 (-0.78,0.84)   |
|              |                    |                     |                                      |                          |                     | Benzodiazepine     | -0.73 (-2.84,1.39) | -1.00 (-2.99,1.00)  |
|              |                    |                     |                                      |                          |                     |                    | SNRI               | -0.27 (-1.33,0.80)  |
|              |                    |                     |                                      |                          |                     |                    |                    | SSRI                |

CBT: cognitive behavioral therapy, SNRI: serotonin-norepinephrine reuptake inhibitor, SSRI: selective serotonin reuptake inhibitor, TCA: tricyclic antidepressant

\*Effect size presented as standardized mean difference (SMD) and 95% confidence intervals calculated from network meta-analysis. Effect size reflects the intervention in the column compared to the intervention in the row.

**eTable 11.** Pairwise comparison for primary anxiety symptoms (clinician report) by medication\*

|                 |                            |                                   |                            |                                     |                             |                            |                            |                            |                            |                            |                            |                            |                             |                            |
|-----------------|----------------------------|-----------------------------------|----------------------------|-------------------------------------|-----------------------------|----------------------------|----------------------------|----------------------------|----------------------------|----------------------------|----------------------------|----------------------------|-----------------------------|----------------------------|
| Pill<br>Placebo | -1.37 (-<br>3.33,0.5<br>8) | -1.29 (-<br>2.40,-<br>0.18)<br>8) | -0.33 (-<br>1.23,0.5<br>7) | 0.36 (-<br>0.52,1.2<br>4)           | -0.78 (-<br>1.60,0.0<br>5)  | -0.60 (-<br>1.76,0.5<br>6) | -0.39 (-<br>1.90,1.1<br>1) | 0.28 (-<br>1.70,2.2<br>6)  | -0.43 (-<br>2.14,1.2<br>8) | -0.71 (-<br>2.42,1.0<br>0) | -0.58 (-<br>1.67,0.5<br>2) | -0.39 (-<br>1.42,0.6<br>5) | -1.04 (-<br>2.03,-<br>0.05) |                            |
|                 | Imiprami<br>ne<br>+CBT     | 0.08 (-<br>2.01,2.1<br>8)         | 1.04 (-<br>0.80,2.8<br>9)  | 1.74 (-<br>0.06,3.5<br>3)           | 0.60 (-<br>1.17,2.3<br>7)   | 0.77 (-<br>1.42,2.9<br>6)  | 0.98 (-<br>1.38,3.3<br>4)  | 1.65 (-<br>1.13,4.4<br>3)  | 0.95 (-<br>1.65,3.5<br>4)  | 0.66 (-<br>1.93,3.2<br>6)  | 0.80 (-<br>1.42,3.0<br>1)  | 0.99 (-<br>1.15,3.1<br>2)  | 0.34 (-<br>1.73,2.4<br>0)   |                            |
|                 |                            | Sertralin<br>e +CBT               | 0.96 (-<br>0.25,2.1<br>7)  | 1.65<br>(0.48,2.<br>82)             | 0.51 (-<br>0.61,1.6<br>4)   | 0.69 (-<br>0.86,2.2<br>4)  | 0.90 (-<br>0.91,2.7<br>0)  | 1.57 (-<br>0.70,3.8<br>4)  | 0.86 (-<br>1.18,2.9<br>0)  | 0.58 (-<br>1.46,2.6<br>2)  | 0.71 (-<br>0.83,2.2<br>6)  | 0.90 (-<br>0.56,2.3<br>7)  | 0.25 (-<br>0.92,1.4<br>2)   |                            |
|                 |                            |                                   | AC/TAU                     | 0.69<br>(0.09,1.<br>30)             | -0.44 (-<br>0.97,0.0<br>8)  | -0.27 (-<br>1.57,1.0<br>3) | -0.06 (-<br>1.61,1.4<br>8) | 0.61 (-<br>1.56,2.7<br>9)  | -0.10 (-<br>2.03,1.8<br>4) | -0.38 (-<br>2.31,1.5<br>6) | -0.24 (-<br>1.63,1.1<br>4) | -0.06 (-<br>1.32,1.2<br>1) | -0.71 (-<br>1.85,0.4<br>4)  |                            |
|                 |                            |                                   |                            | Waitlisti<br>ng/no<br>treatme<br>nt | -1.14 (-<br>1.46,-<br>0.81) | -0.96 (-<br>2.29,0.3<br>7) | -0.75 (-<br>2.34,0.8<br>3) | -0.08 (-<br>2.25,2.0<br>9) | -0.79 (-<br>2.71,1.1<br>4) | -1.07 (-<br>3.00,0.8<br>5) | -0.94 (-<br>2.31,0.4<br>3) | -0.75 (-<br>1.99,0.4<br>9) | -1.40 (-<br>2.51,-<br>0.29) |                            |
|                 |                            |                                   |                            |                                     |                             | CBT                        | 0.17 (-<br>1.12,1.4<br>7)  | 0.38 (-<br>1.18,1.9<br>4)  | 1.06 (-<br>1.09,3.2<br>0)  | 0.35 (-<br>1.55,2.2<br>5)  | 0.07 (-<br>1.83,1.9<br>6)  | 0.20 (-<br>1.13,1.5<br>3)  | 0.39 (-<br>0.81,1.5<br>9)   | -0.26 (-<br>1.32,0.7<br>9) |
|                 |                            |                                   |                            |                                     |                             | Atomox<br>etine            | 0.21 (-<br>1.39,1.8<br>1)  | 0.88 (-<br>1.41,3.1<br>7)  | 0.17 (-<br>1.89,2.2<br>4)  | -0.11 (-<br>2.17,1.9<br>6) | 0.03 (-<br>1.56,1.6<br>1)  | 0.21 (-<br>1.31,1.7<br>4)  | -0.44 (-<br>1.91,1.0<br>4)  |                            |
|                 |                            |                                   |                            |                                     |                             |                            |                            | Venlafa<br>xine            | 0.67 (-<br>1.81,3.1<br>6)  | -0.03 (-<br>2.31,2.2<br>5) | -0.32 (-<br>2.60,1.9<br>6) | -0.18 (-<br>2.04,1.6<br>7) | 0.01 (-<br>1.79,1.8<br>0)   | -0.64 (-<br>2.39,1.1<br>0) |
|                 |                            |                                   |                            |                                     |                             |                            |                            | Clonaze<br>pam             | -0.71 (-<br>3.32,1.9<br>1) | -0.99 (-<br>3.60,1.6<br>3) | -0.86 (-<br>3.12,1.4<br>1) | -0.67 (-<br>2.90,1.5<br>7) | -1.32 (-<br>3.53,0.8<br>9)  |                            |
|                 |                            |                                   |                            |                                     |                             |                            |                            |                            | Duloxeti<br>ne             | -0.28 (-<br>2.70,2.1<br>4) | -0.15 (-<br>2.18,1.8<br>8) | 0.04 (-<br>1.96,2.0<br>4)  | -0.61 (-<br>2.59,1.3<br>7)  |                            |
|                 |                            |                                   |                            |                                     |                             |                            |                            |                            |                            | Paroxeti<br>ne             | 0.13 (-<br>1.90,2.1<br>6)  | 0.32 (-<br>1.68,2.3<br>2)  | -0.33 (-<br>2.31,1.6<br>5)  |                            |
|                 |                            |                                   |                            |                                     |                             |                            |                            |                            |                            |                            | Fluvoxa<br>mine            | 0.19 (-<br>1.06,1.4<br>3)  | -0.46 (-<br>1.93,1.0<br>0)  |                            |

|  |  |  |  |  |  |  |  |  |  |  |  |            |                    |
|--|--|--|--|--|--|--|--|--|--|--|--|------------|--------------------|
|  |  |  |  |  |  |  |  |  |  |  |  | Fluoxetine | -0.65 (-2.04,0.74) |
|  |  |  |  |  |  |  |  |  |  |  |  |            | Sertraline         |

AC/TAU: Attention control/treatment as usual, CBT: cognitive behavioral therapy

\*Effect size presented as standardized mean difference (SMD) and 95% confidence intervals calculated from network meta-analysis. Effect size reflects the intervention in the column compared to the intervention in the row.

**eTable 12.** Pairwise comparison for primary anxiety symptoms (child report) by medication class\*

|              |                    |                    |                                      |                           |                     |                   |                    |                    |
|--------------|--------------------|--------------------|--------------------------------------|---------------------------|---------------------|-------------------|--------------------|--------------------|
| Pill Placebo | -1.12 (-2.84,0.61) | -0.45 (-2.21,1.31) | 0.04 (-0.88,0.96)                    | 0.31 (-0.64,1.26)         | -0.38 (-1.30,0.54)  | 0.42 (-0.67,1.51) | -0.39 (-1.17,0.40) | -0.52 (-1.26,0.21) |
|              | TCA+CBT            | 0.67 (-1.42,2.76)  | 1.16 (-0.35,2.66)                    | 1.43 (-0.05,2.90)         | 0.74 (-0.72,2.19)   | 1.54 (-0.48,3.56) | 0.73 (-1.08,2.54)  | 0.59 (-1.20,2.39)  |
|              |                    | SSRI+CBT           | 0.49 (-1.05,2.03)                    | 0.76 (-0.76,2.27)         | 0.07 (-1.43,1.56)   | 0.87 (-1.18,2.92) | 0.06 (-1.78,1.91)  | -0.07 (-1.90,1.75) |
|              |                    |                    | Attention control/treatment as usual | 0.27 (-0.16,0.70)         | -0.42 (-0.79,-0.05) | 0.38 (-1.02,1.78) | -0.43 (-1.49,0.64) | -0.56 (-1.62,0.49) |
|              |                    |                    |                                      | Waitlistingno / treatment | -0.69 (-0.93,-0.45) | 0.11 (-1.31,1.53) | -0.70 (-1.79,0.40) | -0.83 (-1.90,0.24) |
|              |                    |                    |                                      |                           | CBT                 | 0.80 (-0.60,2.20) | -0.00 (-1.08,1.07) | -0.14 (-1.19,0.90) |
|              |                    |                    |                                      |                           |                     | Benzodiazepine    | -0.81 (-2.15,0.53) | -0.94 (-2.14,0.25) |
|              |                    |                    |                                      |                           |                     |                   | SNRI               | -0.14 (-1.19,0.91) |
|              |                    |                    |                                      |                           |                     |                   |                    | SSRI               |

CBT: cognitive behavioral therapy, SNRI: serotonin-norepinephrine reuptake inhibitor, SSRI: selective serotonin reuptake inhibitor, TCA: tricyclic antidepressant

\*Effect size presented as standardized mean difference (SMD) and 95% confidence intervals calculated from network meta-analysis. Effect size reflects the intervention in the column compared to the intervention in the row.



**eTable 13.** Pairwise comparison for primary anxiety symptoms (child report) by medication\*

|         |                    |                    |                                      |                            |                     |                    |                    |                    |                    |                    |                    |                    |
|---------|--------------------|--------------------|--------------------------------------|----------------------------|---------------------|--------------------|--------------------|--------------------|--------------------|--------------------|--------------------|--------------------|
| Pill    | -1.13 (-2.87,0.62) | -0.46 (-2.24,1.32) | 0.03 (-0.90,0.96)                    | 0.30 (-0.66,1.26)          | -0.39 (-1.32,0.54)  | -0.28 (-1.22,0.67) | -0.44 (-1.38,0.50) | 0.77 (-0.88,2.42)  | 0.16 (-1.33,1.66)  | -1.04 (-2.78,0.71) | -0.52 (-1.37,0.33) | -0.72 (-2.36,0.92) |
| Placebo |                    |                    |                                      |                            |                     |                    |                    |                    |                    |                    |                    |                    |
|         | Imipramine+CBT     | 0.67 (-1.45,2.79)  | 1.16 (-0.37,2.68)                    | 1.43 (-0.07,2.93)          | 0.74 (-0.74,2.21)   | 0.85 (-1.03,2.74)  | 0.69 (-1.20,2.57)  | 1.89 (-0.51,4.30)  | 1.29 (-0.97,3.55)  | 0.09 (-2.30,2.48)  | 0.61 (-1.24,2.45)  | 0.41 (-1.99,2.80)  |
|         |                    | Fluoxetine+CBT     | 0.49 (-1.07,2.05)                    | 0.76 (-0.78,2.30)          | 0.07 (-1.45,1.58)   | 0.18 (-1.73,2.10)  | 0.02 (-1.90,1.93)  | 1.23 (-1.20,3.65)  | 0.62 (-1.66,2.90)  | -0.58 (-2.99,1.84) | -0.06 (-1.93,1.81) | -0.26 (-2.68,2.16) |
|         |                    |                    | Attention control/treatment as usual | 0.27 (-0.17,0.71)          | -0.42 (-0.79,-0.05) | -0.31 (-1.46,0.85) | -0.47 (-1.62,0.68) | 0.74 (-1.16,2.63)  | 0.13 (-1.58,1.84)  | -1.07 (-2.95,0.82) | -0.55 (-1.66,0.56) | -0.75 (-2.63,1.13) |
|         |                    |                    |                                      | Waitlisting no / treatment | -0.69 (-0.93,-0.45) | -0.58 (-1.77,0.62) | -0.74 (-1.93,0.45) | 0.47 (-1.44,2.37)  | -0.14 (-1.86,1.58) | -1.34 (-3.23,0.56) | -0.82 (-1.94,0.30) | -1.02 (-2.92,0.88) |
|         |                    |                    |                                      |                            | CBT                 | 0.12 (-1.05,1.28)  | -0.05 (-1.22,1.12) | 1.16 (-0.74,3.05)  | 0.55 (-1.16,2.26)  | -0.65 (-2.52,1.23) | -0.13 (-1.23,0.97) | -0.33 (-2.21,1.56) |
|         |                    |                    |                                      |                            |                     | Atomoxetine        | -0.16 (-1.32,0.99) | 1.04 (-0.86,2.94)  | 0.44 (-1.32,2.19)  | -0.76 (-2.72,1.20) | -0.24 (-1.48,0.99) | -0.44 (-2.33,1.45) |
|         |                    |                    |                                      |                            |                     | Venlafaxine        | 1.21 (-0.69,3.11)  | 0.60 (-1.15,2.36)  | -0.60 (-2.56,1.37) | -0.08 (-1.31,1.16) | -0.28 (-2.17,1.61) |                    |
|         |                    |                    |                                      |                            |                     |                    | Imipramine         | -0.61 (-2.83,1.62) | -1.80 (-4.20,0.60) | -1.29 (-3.14,0.57) | -1.48 (-3.81,0.84) |                    |
|         |                    |                    |                                      |                            |                     |                    |                    | Clomipramine       | -1.20 (-3.34,0.94) | -0.68 (-2.18,0.82) | -0.88 (-3.10,1.34) |                    |
|         |                    |                    |                                      |                            |                     |                    |                    |                    | Fluvoxamine        | 0.52 (-1.01,2.04)  | 0.32 (-2.07,2.71)  |                    |
|         |                    |                    |                                      |                            |                     |                    |                    |                    |                    |                    | -0.20 (-2.04,1.64) |                    |
|         |                    |                    |                                      |                            |                     |                    |                    |                    |                    |                    |                    | Sertraline         |

CBT: cognitive behavioral therapy

\*Effect size presented as standardized mean difference (SMD) and 95% confidence intervals calculated from network meta-analysis. Effect size reflects the intervention in the column compared to the intervention in the row.

**eTable 14.** Pairwise comparison for primary anxiety symptoms (parent report) by medication class\*

|                                      |                   |                          |                     |                    |                    |                    |
|--------------------------------------|-------------------|--------------------------|---------------------|--------------------|--------------------|--------------------|
| Pill Placebo                         | 0.12 (-1.11,1.36) | 0.77 (-0.57,2.10)        | 0.01 (-1.30,1.33)   | 0.44 (-1.05,1.93)  | -0.31 (-1.56,0.94) | -0.76 (-1.75,0.22) |
| Attention control/treatment as usual |                   | 0.64 (0.13,1.16)         | -0.11 (-0.56,0.34)  | 0.32 (-1.62,2.25)  | -0.44 (-1.68,0.81) | -0.89 (-2.47,0.70) |
|                                      |                   | Waitlisting/no treatment | -0.75 (-1.01,-0.49) | -0.32 (-2.33,1.68) | -1.08 (-2.42,0.27) | -1.53 (-3.19,0.13) |
|                                      |                   |                          | CBT                 | 0.43 (-1.56,2.41)  | -0.33 (-1.65,1.00) | -0.78 (-2.42,0.87) |
|                                      |                   |                          |                     | TCA                | -0.75 (-2.69,1.19) | -1.20 (-2.99,0.58) |
|                                      |                   |                          |                     |                    | SNRI               | -0.45 (-2.04,1.14) |
|                                      |                   |                          |                     |                    |                    | SSRI               |

CBT: cognitive behavioral therapy, SNRI: serotonin-norepinephrine reuptake inhibitor, SSRI: selective serotonin reuptake inhibitor, TCA: tricyclic antidepressant

\*Effect size presented as standardized mean difference (SMD) and 95% confidence intervals calculated from network meta-analysis. Effect size reflects the intervention in the column compared to the intervention in the row.

**eTable 15.** Pairwise comparison for primary anxiety symptoms (parent report) by medication\*

|                                      |                     |                    |                    |                    |                    |                    |                    |                    |                    |
|--------------------------------------|---------------------|--------------------|--------------------|--------------------|--------------------|--------------------|--------------------|--------------------|--------------------|
| Pill Placebo                         | 0.12 (-1.13,1.37)   | 0.76 (-0.59,2.12)  | 0.01 (-1.32,1.34)  | -0.23 (-1.48,1.03) | -0.31 (-1.57,0.95) | 0.44 (-1.06,1.94)  | -0.35 (-2.23,1.54) | -0.45 (-1.76,0.85) | -1.19 (-2.72,0.34) |
| Attention control/treatment as usual | 0.64 (0.12,1.16)    | -0.11 (-0.56,0.34) | -0.35 (-1.61,0.91) | -0.43 (-1.69,0.83) | 0.32 (-1.63,2.27)  | -0.47 (-2.73,1.79) | -0.57 (-2.38,1.24) | -1.31 (-3.29,0.66) |                    |
| Waitlist/no treatment                | -0.75 (-1.01,-0.49) | -0.99 (-2.35,0.37) | -1.07 (-2.43,0.29) | -0.32 (-1.57,2.43) | -1.11 (-3.43,1.21) | -1.21 (-3.09,0.66) | -1.96 (-4.00,0.09) |                    |                    |
| CBT                                  | -0.24 (-1.57,1.10)  | -0.32 (-1.65,1.02) | 0.43 (-1.57,2.43)  | -0.36 (-2.66,1.95) | -0.46 (-2.32,1.40) | -1.20 (-3.23,0.82) |                    |                    |                    |
| Atomoxetine                          | -0.08 (-1.34,1.18)  | 0.67 (-1.29,2.62)  | -0.12 (-2.39,2.15) | -0.23 (-2.04,1.59) | -0.97 (-2.95,1.01) |                    |                    |                    |                    |
| Venlafaxine                          | 0.75 (-1.21,2.71)   | -0.04 (-2.31,2.23) | -0.14 (-1.96,1.67) | -0.88 (-2.87,1.10) |                    |                    |                    |                    |                    |
| Imipramine                           | -0.79 (-3.19,1.62)  | -0.89 (-2.88,1.10) | -1.63 (-3.77,0.51) |                    |                    |                    |                    |                    |                    |
| Fluvoxamine                          | -0.11 (-1.46,1.25)  | -0.85 (-3.27,1.58) |                    |                    |                    |                    |                    |                    |                    |
| Fluoxetine                           | -0.74 (-2.75,1.27)  |                    |                    |                    |                    |                    |                    |                    |                    |
| Sertraline                           |                     |                    |                    |                    |                    |                    |                    |                    |                    |

CBT: cognitive behavioral therapy

\*Effect size presented as standardized mean difference (SMD) and 95% confidence intervals calculated from network meta-analysis. Effect size reflects the intervention in the column compared to the intervention in the row.

**eTable 16.** Pairwise comparison for remission by medication class\*

|              |                 |                                      |                           |                 |                 |                 |
|--------------|-----------------|--------------------------------------|---------------------------|-----------------|-----------------|-----------------|
| Pill Placebo | 1.86(0.94,3.71) | 1.52(0.64,3.63)                      | 0.61(0.24,1.58)           | 2.72(1.36,5.37) | 1.72(0.66,4.53) | 2.01(1.16,3.49) |
|              | SSRI+CBT        | 0.82(0.39,1.73)                      | 0.33(0.14,0.77)           | 1.45(0.84,2.53) | 0.92(0.33,2.64) | 1.08(0.62,1.88) |
|              |                 | Attention control/treatment as usual | 0.4(0.17,0.92)            | 1.77(1.04,3.03) | 1.13(0.35,3.63) | 1.32(0.62,2.83) |
|              |                 |                                      | Waitlistingno / treatment | 4.44(2.29,8.58) | 2.83(0.83,9.68) | 3.29(1.39,7.77) |
|              |                 |                                      |                           | CBT             | 0.64(0.23,1.8)  | 0.74(0.43,1.28) |
|              |                 |                                      |                           |                 | TCA             | 1.17(0.47,2.89) |
|              |                 |                                      |                           |                 |                 | SSRI            |

CBT: cognitive behavioral therapy, SSRI: selective serotonin reuptake inhibitor, TCA: tricyclic antidepressant

\*Effect size presented as relative risk (RR) and 95% confidence intervals calculated from network meta-analysis. Effect size reflects the intervention in the column compared to the intervention in the row.

**eTable 17.** Pairwise comparison for remission by medication\*

|              |                 |                  |                                      |                          |                 |                  |                  |                  |
|--------------|-----------------|------------------|--------------------------------------|--------------------------|-----------------|------------------|------------------|------------------|
| Pill Placebo | 0.48(0.07,3.46) | 1.82(0.69,4.85)  | 1.06(0.33,3.35)                      | 0.43(0.13,1.45)          | 2.01(0.76,5.42) | 1.77(0.57,5.53)  | 2.08(0.92,4.66)  | 1.75(0.66,4.66)  |
|              | Fluoxetine +CBT | 3.78(0.6,24.05)  | 2.2(0.36,13.46)                      | 0.89(0.14,5.64)          | 4.22(0.76,23.1) | 3.67(0.38,35.87) | 4.31(0.51,36.23) | 3.67(0.58,23.1)  |
|              |                 | Sertraline + CBT | 0.58(0.23,1.45)                      | 0.23(0.09,0.63)          | 1.11(0.55,2.2)  | 0.97(0.21,4.35)  | 1.14(0.32,4.06)  | 0.96(0.48,1.93)  |
|              |                 |                  | Attention control/treatment as usual | 0.4(0.16,1)              | 1.92(1.05,3.49) | 1.67(0.33,8.5)   | 1.97(0.48,8.08)  | 1.67(0.66,4.18)  |
|              |                 |                  |                                      | Waitlisting no/treatment | 4.76(2.32,9.68) | 4.14(0.78,21.98) | 4.9(1.13,21.12)  | 4.14(1.52,11.25) |
|              |                 |                  |                                      |                          | CBT             | 0.88(0.19,3.94)  | 1.03(0.29,3.67)  | 0.87(0.44,1.75)  |
|              |                 |                  |                                      |                          |                 | Clomipramine     | 1.17(0.41,3.35)  | 0.99(0.22,4.48)  |
|              |                 |                  |                                      |                          |                 |                  | Fluoxetine       | 0.84(0.24,3)     |
|              |                 |                  |                                      |                          |                 |                  |                  | Sertraline       |

CBT: cognitive behavioral therapy

\*Effect size presented as relative risk (RR) and 95% confidence intervals calculated from network meta-analysis. Effect size reflects the intervention in the column compared to the intervention in the row.

**eTable 18.** Pairwise comparison for response by medication class\*

|              |                  |                                      |                          |                  |                  |
|--------------|------------------|--------------------------------------|--------------------------|------------------|------------------|
| Pill Placebo | 2.59(0.44,15.03) | 0.93(0.14,6.17)                      | 0.41(0.07,2.64)          | 1.79(0.31,10.38) | 1.86(0.63,5.42)  |
|              | SSRI+CBT         | 0.36(0.1,1.34)                       | 0.16(0.05,0.57)          | 0.69(0.23,2.12)  | 0.71(0.18,2.89)  |
|              |                  | Attention control/treatment as usual | 0.44(0.18,1.06)          | 1.92(0.97,3.78)  | 1.97(0.42,9.39)  |
|              |                  |                                      | Waitlisting/no treatment | 4.35(2.41,7.77)  | 4.48(0.98,20.29) |
|              |                  |                                      |                          | CBT              | 1.03(0.26,4.18)  |
|              |                  |                                      |                          |                  | SSRI             |

CBT: cognitive behavioral therapy, SNRI: serotonin-norepinephrine reuptake inhibitor

\*Effect size presented as relative risk (RR) and 95% confidence intervals calculated from network meta-analysis. Effect size reflects the intervention in the column compared to the intervention in the row.

**eTable 19.** Pairwise comparison for response by medication\*

|              |                     |                     |                                         |                            |                     |                      |                      |                      |                     |
|--------------|---------------------|---------------------|-----------------------------------------|----------------------------|---------------------|----------------------|----------------------|----------------------|---------------------|
| Pill Placebo | 2.48(0, 9530426.23) | 1.84(0, 6851649.61) | 0.75(0, 2623447.89)                     | 0.32(0, 1110143.67)        | 1.45(0, 4975318.77) | 2.01(0.39, 10.38)    | 1.34(0.12, 14.44)    | 1.7(0.31, 9.21)      | 1.4(0, 5178365.38)  |
|              | Fluoxetine+ CBT     | 0.74(0.06, 8.76)    | 0.3(0.04, 2.23)                         | 0.13(0.02, 0.91)           | 0.58(0.09, 3.74)    | 0.81(0, 3402428.5)   | 0.54(0, 2495500.83)  | 0.68(0, 2870509.22)  | 0.57(0.05, 6.69)    |
|              |                     | Sertraline+ CBT     | 0.41(0.07, 2.44)                        | 0.17(0.03, 0.99)           | 0.79(0.15, 4.01)    | 1.09(0, 4457060.38)  | 0.73(0, 3236490.11)  | 0.92(0, 3760265.03)  | 0.76(0.15, 3.86)    |
|              |                     |                     | Attention control or treatment as usual | 0.43(0.17, 1.08)           | 1.93(0.92, 4.01)    | 2.69(0, 10221460.11) | 1.77(0, 7496898.8)   | 2.25(0, 8623486.27)  | 1.86(0.31, 11.13)   |
|              |                     |                     |                                         | Waitlisting no / treatment | 4.53(2.46, 8.33)    | 6.3(0, 23914606.96)  | 4.18(0, 17365568.81) | 5.31(0, 20175912.49) | 4.39(0.76, 25.03)   |
|              |                     |                     |                                         |                            | CBT                 | 1.39(0, 5230408.81)  | 0.92(0, 3836227.42)  | 1.17(0, 4412711.89)  | 0.97(0.19, 4.95)    |
|              |                     |                     |                                         |                            |                     | Paroxetine           | 0.66(0.04, 11.94)    | 0.84(0.08, 8.85)     | 0.69(0, 2813669.33) |
|              |                     |                     |                                         |                            |                     |                      | Fluvoxamine          | 1.27(0.24, 6.75)     | 1.05(0, 4685578.76) |
|              |                     |                     |                                         |                            |                     |                      |                      | Fluoxetine           | 0.83(0, 3368573.77) |
|              |                     |                     |                                         |                            |                     |                      |                      |                      | Sertraline          |

CBT: cognitive behavioral therapy

\*Effect size presented as relative risk (RR) and 95% confidence intervals calculated from network meta-analysis. Effect size reflects the intervention in the column compared to the intervention in the row.

**eTable 20.** Network consistency test for network of primary anxiety symptoms (clinician report) by medication class

| Comparison                                                        | Direct coefficient | Standard error | Indirect coefficient | Standard error | Difference coefficient | Standard error | P value* |
|-------------------------------------------------------------------|--------------------|----------------|----------------------|----------------|------------------------|----------------|----------|
| Pill Placebo vs. Attention control/treatment as usual             | -0.34              | 0.85           | -0.30                | 0.51           | -0.04                  | 0.99           | 0.97     |
| Pill Placebo vs. SSRI+CBT                                         | -0.93              | 0.59           | -1.97                | 1.08           | 1.04                   | 1.23           | 0.40     |
| SSRI vs. Pill Placebo                                             | 0.72               | 0.31           | 0.82                 | 1.84           | -0.10                  | 1.86           | 0.96     |
| SSRI vs. CBT                                                      | -0.17              | 0.49           | 0.35                 | 0.81           | -0.52                  | 0.95           | 0.58     |
| SSRI vs. SSRI+CBT                                                 | -0.49              | 0.60           | -0.33                | 1.15           | -0.16                  | 1.30           | 0.90     |
| SNRI vs. Pill Placebo                                             | 0.46               | 0.49           | 0.33                 | 1.82           | 0.13                   | 1.88           | 0.95     |
| SNRI vs. Attention control/treatment as usual                     | 0.09               | 0.85           | 0.18                 | 0.80           | -0.10                  | 1.17           | 0.93     |
| Benzodiazepine vs. Pill Placebo                                   | .                  | .              | .                    | .              | .                      | .              | .        |
| CBT vs. Pill Placebo                                              | 0.58               | 0.49           | 1.04                 | 0.66           | -0.46                  | 0.83           | 0.58     |
| CBT vs. Waitlistno treatment/ing                                  | 1.14               | 0.16           | 0.40                 | 1.56           | 0.74                   | 1.57           | 0.64     |
| CBT vs. Attention control/treatment as usual                      | 0.44               | 0.27           | 0.41                 | 0.78           | 0.03                   | 0.82           | 0.97     |
| CBT vs. SSRI+CBT                                                  | -0.63              | 0.59           | 0.70                 | 1.38           | -1.33                  | 1.50           | 0.37     |
| CBT vs. TCA+CBT                                                   | -0.60              | 0.86           | 1.48                 | 63.27          | -2.08                  | 63.27          | 0.97     |
| Waitlisting/no treatment vs. Attention control/treatment as usual | -0.46              | 0.86           | -0.73                | 0.32           | 0.28                   | 0.92           | 0.76     |

CBT: cognitive behavioral therapy, SNRI: serotonin-norepinephrine reuptake inhibitor, SSRI: selective serotonin reuptake inhibitor, TCA: tricyclic antidepressant  
 \*: P value<0.05 suggests no indication of network inconsistency.



**eTable 21.** Network consistency test for network of primary anxiety symptoms (clinician report) by medication

| Comparison                                                        | Direct coefficient | Standard error | Indirect coefficient | Standard error | Difference coefficient | Standard error | P value* |
|-------------------------------------------------------------------|--------------------|----------------|----------------------|----------------|------------------------|----------------|----------|
| Pill Placebo vs. Attention control/treatment as usual             | -0.33              | 0.90           | -0.33                | 0.55           | 0.00                   | 1.05           | 1.00     |
| Pill Placebo vs. Sertraline+CBT                                   | -0.93              | 0.61           | -3.07                | 1.36           | 2.14                   | 1.49           | 0.15     |
| Sertraline vs. Pill Placebo                                       | 0.95               | 0.54           | 1.84                 | 1.62           | -0.89                  | 1.71           | 0.60     |
| Sertraline vs. CBT                                                | 0.15               | 0.63           | 0.65                 | 1.13           | -0.50                  | 1.29           | 0.70     |
| Sertraline vs. Sertraline+CBT                                     | -0.49              | 0.61           | 3.04                 | 2.27           | -3.53                  | 2.35           | 0.13     |
| Fluoxetine vs. Pill Placebo                                       | 0.38               | 0.64           | 0.40                 | 0.97           | -0.02                  | 1.17           | 0.99     |
| Fluoxetine vs. Fluvoxamine                                        | 0.12               | 0.93           | -0.47                | 0.90           | 0.59                   | 1.29           | 0.65     |
| Fluoxetine vs. CBT                                                | -0.82              | 0.90           | 0.00                 | 0.85           | -0.81                  | 1.24           | 0.51     |
| Fluvoxamine vs. Pill Placebo                                      | 0.73               | 0.66           | 0.14                 | 1.11           | 0.59                   | 1.29           | 0.65     |
| Paroxetine vs. Pill Placebo                                       | .                  | .              | .                    | .              | .                      | .              | .        |
| Duloxetine vs. Pill Placebo                                       | .                  | .              | .                    | .              | .                      | .              | .        |
| Clonazepam vs. Pill Placebo                                       | .                  | .              | .                    | .              | .                      | .              | .        |
| Venlafaxine vs. Pill Placebo                                      | 0.41               | 0.90           | 0.33                 | 1.62           | 0.08                   | 1.85           | 0.96     |
| Venlafaxine vs. Atomoxetine                                       | -0.25              | 0.90           | 0.05                 | 2.25           | -0.30                  | 2.42           | 0.90     |
| Venlafaxine vs. Attention control/treatment as usual              | 0.08               | 0.90           | -0.03                | 1.82           | 0.11                   | 2.02           | 0.96     |
| Atomoxetine vs. Pill Placebo                                      | 0.59               | 0.63           | 0.70                 | 1.92           | -0.11                  | 2.02           | 0.96     |
| Atomoxetine vs. Attention control/treatment as usual              | 0.33               | 0.90           | 0.19                 | 1.03           | 0.15                   | 1.36           | 0.92     |
| CBT vs. Pill Placebo                                              | 0.58               | 0.52           | 1.20                 | 0.76           | -0.61                  | 0.92           | 0.51     |
| CBT vs. Waitlisting/no treatment                                  | 1.15               | 0.17           | 0.42                 | 1.64           | 0.72                   | 1.65           | 0.66     |
| CBT vs. Attention control/treatment as usual                      | 0.44               | 0.29           | 0.50                 | 0.83           | -0.06                  | 0.88           | 0.95     |
| CBT vs. Sertraline + CBT                                          | -0.63              | 0.63           | 0.26                 | 1.59           | -0.89                  | 1.71           | 0.60     |
| CBT vs. Imipramine + CBT                                          | -0.60              | 0.90           | 1.54                 | 63.27          | -2.14                  | 63.28          | 0.97     |
| Waitlisting vs no treatment/ Attention control/treatment as usual | -0.46              | 0.90           | -0.73                | 0.33           | 0.27                   | 0.96           | 0.78     |

CBT: cognitive behavioral therapy

\*: P value<0.05 suggests no indication of network inconsistency.

**eTable 22.** Network consistency test for network of primary anxiety symptoms (child report) by medication class

| Comparison                                                        | Direct coefficient | Standard error | Indirect coefficient | Standard error | Difference coefficient | Standard error | P value* |
|-------------------------------------------------------------------|--------------------|----------------|----------------------|----------------|------------------------|----------------|----------|
| Pill Placebo vs. Attention control/treatment as usual             | -0.12              | 0.72           | 0.16                 | 0.63           | -0.27                  | 0.96           | 0.78     |
| SSRI vs. Pill Placebo                                             | 0.55               | 0.39           | 0.25                 | 1.43           | 0.30                   | 1.48           | 0.84     |
| SSRI vs. Benzodiazepine                                           | 0.94               | 0.85           | 0.96                 | 0.89           | -0.02                  | 1.24           | 0.99     |
| SSRI vs. CBT                                                      | 0.15               | 0.73           | 0.13                 | 0.80           | 0.02                   | 1.09           | 0.98     |
| SNRI vs. Pill Placebo                                             | 0.41               | 0.42           | 0.01                 | 1.85           | 0.40                   | 1.90           | 0.83     |
| SNRI vs. Attention control/treatment as usual                     | 0.41               | 0.72           | 0.45                 | 0.84           | -0.05                  | 1.11           | 0.97     |
| Benzodiazepine vs. Pill Placebo                                   | -0.34              | 0.59           | -1.09                | 1.70           | 0.75                   | 1.80           | 0.68     |
| CBT vs. Pill Placebo                                              | 0.22               | 0.74           | 0.50                 | 0.62           | -0.28                  | 0.97           | 0.77     |
| CBT vs. Waitlist/treatment no t/ing                               | 0.69               | 0.12           | 0.78                 | 1.35           | -0.09                  | 1.35           | 0.95     |
| CBT vs. Attention control/treatment as usual                      | 0.40               | 0.20           | 0.75                 | 0.76           | -0.35                  | 0.79           | 0.66     |
| CBT vs. SSRI+CBT                                                  | -0.07              | 0.76           | 0.77                 | 63.26          | -0.84                  | 63.27          | 0.99     |
| CBT vs. TCA+CBT                                                   | -0.74              | 0.74           | 0.75                 | 63.26          | -1.49                  | 63.27          | 0.98     |
| Waitlisting .treatment vs no/Attention control/treatment as usual | 0.15               | 0.76           | -0.31                | 0.23           | 0.46                   | 0.79           | 0.56     |

CBT: cognitive behavioral therapy, SNRI: serotonin-norepinephrine reuptake inhibitor, SSRI: selective serotonin reuptake inhibitor, TCA: tricyclic antidepressant

\*: P value<0.05 suggests no indication of network inconsistency.

**eTable 23.** Network consistency test for network of primary anxiety symptoms (child report) by medication

| Comparison                                                        | Direct coefficient | Standard error | Indirect coefficient | Standard error | Difference coefficient | Standard error | P value* |
|-------------------------------------------------------------------|--------------------|----------------|----------------------|----------------|------------------------|----------------|----------|
| Pill Placebo vs. Attention control/treatment as usual             | -0.11              | 0.73           | 0.14                 | 0.63           | -0.25                  | 0.97           | 0.80     |
| Sertraline vs. Pill Placebo                                       | .                  | .              | .                    | .              | .                      | .              | .        |
| Fluoxetine vs. Pill Placebo                                       | 0.50               | 0.45           | 0.93                 | 1.86           | -0.43                  | 1.92           | 0.82     |
| Fluoxetine vs. Fluvoxamine                                        | -0.52              | 0.78           | 1.26                 | 63.26          | -1.78                  | 63.27          | 0.98     |
| Fluoxetine vs. Clomipramine                                       | 0.94               | 0.86           | -0.42                | 1.78           | 1.36                   | 1.98           | 0.49     |
| Fluoxetine vs. CBT                                                | 0.15               | 0.74           | 0.09                 | 0.88           | 0.06                   | 1.15           | 0.96     |
| Clomipramine vs. Waitlistno tx/                                   | 0.08               | 0.84           | -1.28                | 1.80           | 1.36                   | 1.98           | 0.49     |
| Imipramine vs. Pill Placebo                                       | .                  | .              | .                    | .              | .                      | .              | .        |
| Venlafaxine vs. Pill Placebo                                      | 0.49               | 0.52           | 0.09                 | 1.45           | 0.40                   | 1.54           | 0.80     |
| Venlafaxine vs. Atomoxetine                                       | 0.13               | 0.74           | 0.24                 | 1.03           | -0.12                  | 1.27           | 0.93     |
| Venlafaxine vs. Attention control/treatment as usual              | 0.39               | 0.73           | 0.62                 | 1.01           | -0.23                  | 1.25           | 0.85     |
| Atomoxetine vs. Pill Placebo                                      | 0.30               | 0.52           | 0.08                 | 1.45           | 0.22                   | 1.54           | 0.89     |
| Atomoxetine vs. Attention control/treatment as usual              | 0.27               | 0.73           | 0.38                 | 1.01           | -0.12                  | 1.25           | 0.92     |
| CBT vs. Pill Placebo                                              | 0.22               | 0.75           | 0.52                 | 0.63           | -0.30                  | 0.98           | 0.76     |
| CBT vs. Waitlistingno treatment/                                  | 0.69               | 0.12           | 0.78                 | 1.37           | -0.09                  | 1.37           | 0.95     |
| CBT vs. Attention control/treatment as usual                      | 0.40               | 0.20           | 0.73                 | 0.77           | -0.33                  | 0.80           | 0.68     |
| CBT vs. Fluoxetine+CBT                                            | -0.07              | 0.77           | 0.79                 | 63.26          | -0.85                  | 63.27          | 0.99     |
| CBT vs. Imipramine+CBT                                            | -0.74              | 0.75           | 0.77                 | 63.26          | -1.51                  | 63.27          | 0.98     |
| Waitlisting .no treatment vs/Attention control/treatment as usual | 0.15               | 0.77           | -0.31                | 0.24           | 0.46                   | 0.80           | 0.57     |

CBT: cognitive behavioral therapy

\*: P value<0.05 suggests no indication of network inconsistency.

**eTable 24.** Network consistency test for network of primary anxiety symptoms (parent report) by medication class

| Comparison                                            | Direct coefficient | Standard error | Indirect coefficient | Standard error | Difference coefficient | Standard error | P value* |
|-------------------------------------------------------|--------------------|----------------|----------------------|----------------|------------------------|----------------|----------|
| Pill Placebo vs. Attention control/treatment as usual | 0.13               | 0.64           | -0.18                | 5.13           | 0.30                   | 5.17           | 0.95     |
| SSRI vs. Pill Placebo                                 | .                  | .              | .                    | .              | .                      | .              | .        |
| SNRI vs. Pill Placebo                                 | 0.31               | 0.64           | 0.92                 | 10.33          | -0.61                  | 10.35          | 0.95     |
| SNRI vs. Attention control/treatment as usual         | 0.44               | 0.64           | -0.17                | 10.33          | 0.61                   | 10.35          | 0.95     |
| TCA vs. Pill Placebo                                  | .                  | .              | .                    | .              | .                      | .              | .        |
| CBT vs. Waitlistingno treatment/                      | 0.75               | 0.13           | 0.00                 | 11.82          | 0.75                   | 11.82          | 0.95     |
| CBT vs. Attention control/treatment as usual          | 0.11               | 0.23           | 0.47                 | 5.70           | -0.36                  | 5.70           | 0.95     |

CBT: cognitive behavioral therapy, SNRI: serotonin-norepinephrine reuptake inhibitor, SSRI: selective serotonin reuptake inhibitor, TCA: tricyclic antidepressant

\*: P value<0.05 suggests no indication of network inconsistency.

**eTable 25.** Network consistency test for network of primary anxiety symptoms (parent report) by medication

| Comparison                                            | Direct coefficient | Standard error | Indirect coefficient | Standard error | Difference coefficient | Standard error | P value* |
|-------------------------------------------------------|--------------------|----------------|----------------------|----------------|------------------------|----------------|----------|
| Pill Placebo vs. Attention control/treatment as usual | 0.13               | 0.64           | -0.18                | 5.13           | 0.30                   | 5.18           | 0.95     |
| Sertraline vs. Pill Placebo                           | .                  | .              | .                    | .              | .                      | .              | .        |
| Fluoxetine vs. Pill Placebo                           | 0.45               | 0.67           | 0.08                 | 31.63          | 0.37                   | 31.64          | 0.99     |
| Fluoxetine vs. Fluvoxamine                            | 0.11               | 0.69           | 0.84                 | 63.27          | -0.74                  | 63.27          | 0.99     |
| Imipramine vs. Pill Placebo                           | .                  | .              | .                    | .              | .                      | .              | .        |
| Venlafaxine vs. Pill Placebo                          | 0.30               | 0.64           | 0.91                 | 10.33          | -0.60                  | 10.35          | 0.95     |
| Venlafaxine vs. Atomoxetine                           | .                  | .              | .                    | .              | .                      | .              | .        |
| Venlafaxine vs. Attention control/treatment as usual  | 0.43               | 0.64           | -0.17                | 10.33          | 0.60                   | 10.35          | 0.95     |
| Atomoxetine vs. Pill Placebo                          | 0.22               | 0.64           | 0.83                 | 10.33          | -0.60                  | 10.35          | 0.95     |
| Atomoxetine vs. Attention control/treatment as usual  | 0.35               | 0.64           | -0.25                | 10.33          | 0.60                   | 10.35          | 0.95     |
| CBT vs. Waitlisting/no treatment                      | 0.75               | 0.13           | 0.00                 | 11.83          | 0.75                   | 11.83          | 0.95     |
| CBT vs. Attention control/treatment as usual          | 0.11               | 0.23           | 0.47                 | 5.70           | -0.36                  | 5.70           | 0.95     |

CBT: cognitive behavioral therapy

\*: P value<0.05 suggests no indication of network inconsistency.

**eTable 26.** Network consistency test for network of remission by medication class

| Comparison                                                      | Direct coefficient | Standard error | Indirect coefficient | Standard error | Difference coefficient | Standard error | P value* |
|-----------------------------------------------------------------|--------------------|----------------|----------------------|----------------|------------------------|----------------|----------|
| Pill Placebo vs. SSRI+CBT                                       | 1.03               | 0.44           | 0.15                 | 0.48           | 0.88                   | 0.65           | 0.18     |
| SSRI vs. Pill Placebo                                           | -0.72              | 0.31           | -0.48                | 1.04           | -0.23                  | 1.07           | 0.83     |
| SSRI vs. TCA                                                    | -0.18              | 0.51           | 0.05                 | 1.30           | -0.23                  | 1.38           | 0.87     |
| SSRI vs. CBT                                                    | 0.24               | 0.31           | 0.86                 | 0.95           | -0.63                  | 1.00           | 0.53     |
| SSRI vs. SSRI+CBT                                               | 0.00               | 0.31           | -0.84                | 0.95           | 0.84                   | 1.00           | 0.40     |
| TCA vs. Pill Placebo                                            | -0.61              | 0.63           | -0.38                | 1.14           | -0.23                  | 1.38           | 0.87     |
| CBT vs. Pill Placebo                                            | -0.46              | 0.41           | -1.56                | 0.42           | 1.11                   | 0.58           | 0.06     |
| CBT vs. Waitlist/no treatment/                                  | -1.49              | 0.33           | 3.55                 | 2.97           | -5.04                  | 2.95           | 0.09     |
| CBT vs. Attention control/treatment as usual                    | -0.57              | 0.27           | 2.78                 | 3.00           | -3.35                  | 2.99           | 0.26     |
| CBT vs. SSRI+CBT                                                | -0.37              | 0.28           | 0.92                 | 23.91          | -1.30                  | 23.91          | 0.96     |
| Waitlist/no treatment/ vs. Attention control/treatment as usual | 0.10               | 2.01           | 0.95                 | 0.44           | -0.86                  | 2.06           | 0.68     |

CBT: cognitive behavioral therapy, SSRI: selective serotonin reuptake inhibitor, TCA: tricyclic antidepressant  
 \*: P value<0.05 suggests no indication of network inconsistency.

**eTable 27.** Network consistency test for network of remission by medication

| Comparison                                                         | Direct coefficient | Standard error | Indirect coefficient | Standard error | Difference coefficient | Standard error | P value* |
|--------------------------------------------------------------------|--------------------|----------------|----------------------|----------------|------------------------|----------------|----------|
| Pill Placebo vs. Sertraline+CBT                                    | 0.91               | 0.44           | -0.95                | 0.90           | 1.86                   | 0.96           | 0.05     |
| Sertraline vs. Pill Placebo                                        | -0.60              | 0.59           | -0.39                | 1.25           | -0.21                  | 1.36           | 0.88     |
| Sertraline vs. CBT                                                 | 0.14               | 0.35           | -0.52                | 23.02          | 0.65                   | 23.02          | 0.98     |
| Sertraline vs. Sertraline+CBT                                      | .                  | .              | .                    | .              | .                      | .              | .        |
| Fluoxetine vs. Pill Placebo                                        | .                  | .              | .                    | .              | .                      | .              | .        |
| Fluoxetine vs. Clomipramine                                        | -0.18              | 0.60           | 0.01                 | 1.69           | -0.19                  | 1.78           | 0.92     |
| Clomipramine vs Pill Placebo                                       | -0.61              | 0.70           | -0.42                | 1.57           | -0.19                  | 1.78           | 0.92     |
| CBT vs. Pill Placebo                                               | -0.34              | 0.38           | -2.40                | 0.72           | 2.07                   | 0.77           | 0.01     |
| CBT vs. Waitlistingno treatment/                                   | -1.55              | 0.36           | 3.34                 | 3.02           | -4.89                  | 3.00           | 0.10     |
| CBT vs. Attention control/treatment as usual                       | -0.65              | 0.30           | 2.52                 | 3.07           | -3.17                  | 3.05           | 0.30     |
| CBT vs. Sertraline+CBT                                             | -0.10              | 0.35           | 0.55                 | 23.02          | -0.65                  | 23.02          | 0.98     |
| CBT vs. Fluoxetine+CBT                                             | -1.44              | 0.87           | -1.85                | 111.36         | 0.42                   | 111.36         | 1.00     |
| Waitlistingno treatment vs. Attention / control/treatment as usual | 0.10               | 2.03           | 0.95                 | 0.48           | -0.86                  | 2.09           | 0.68     |

CBT: cognitive behavioral therapy

\*: P value<0.05 suggests no indication of network inconsistency.



**eTable 28.** Network consistency test for network of response by medication class

| Comparison                                                       | Direct coefficient | Standard error | Indirect coefficient | Standard error | Difference coefficient | Standard error | P value* |
|------------------------------------------------------------------|--------------------|----------------|----------------------|----------------|------------------------|----------------|----------|
| SSRI vs. Pill Placebo                                            | -0.62              | 0.55           | -0.39                | 7.71           | -0.23                  | 7.73           | 0.98     |
| SSRI vs. CBT                                                     | 0.03               | 0.79           | -0.54                | 2.18           | 0.57                   | 2.32           | 0.81     |
| SSRI vs. SSRI+CBT                                                | 0.27               | 0.79           | 0.84                 | 2.23           | -0.56                  | 2.36           | 0.81     |
| CBT vs. Waitlist/no treatment/                                   | -1.49              | 0.30           | -1.73                | 1.79           | 0.24                   | 1.77           | 0.89     |
| CBT vs. Attention control/treatment as usual                     | -0.71              | 0.34           | 2.63                 | 2.42           | -3.34                  | 2.44           | 0.17     |
| CBT vs. SSRI+CBT                                                 | 0.37               | 0.57           | 0.63                 | 16.76          | -0.26                  | 16.77          | 0.99     |
| Waitlist/no treatment vs. Attention / alcontrol/treatment as usu | 1.66               | 1.18           | 0.67                 | 0.50           | 0.99                   | 1.29           | 0.44     |

CBT: cognitive behavioral therapy, SSRI: selective serotonin reuptake inhibitor

\*: P value<0.05 suggests no indication of network inconsistency.

**eTable 29.** Network consistency test for network of response by medication

| Comparison                                                         | Direct coefficient | Standard error | Indirect coefficient | Standard error | Difference coefficient | Standard error | P value* |
|--------------------------------------------------------------------|--------------------|----------------|----------------------|----------------|------------------------|----------------|----------|
| Sertraline vs. CBT                                                 | 0.03               | 0.83           | 1.05                 | 47.11          | -1.02                  | 47.12          | 0.98     |
| Sertraline vs. Sertraline+CBT                                      | .                  | .              | .                    | .              | .                      | .              | .        |
| Fluoxetine vs. Pill Placebo                                        | -0.53              | 0.87           | -0.18                | 26.01          | -0.35                  | 26.02          | 0.99     |
| Fluoxetine vs. Fluvoxamine                                         | -0.24              | 0.85           | -0.93                | 52.04          | 0.69                   | 52.04          | 0.99     |
| Paroxetine vs. Pill Placebo                                        | .                  | .              | .                    | .              | .                      | .              | .        |
| CBT vs. Waitlistingno treatment/                                   | -1.53              | 0.32           | -1.85                | 1.95           | 0.33                   | 1.94           | 0.87     |
| CBT vs. Attention control/treatment as usual                       | -0.72              | 0.37           | 2.55                 | 2.50           | -3.27                  | 2.52           | 0.19     |
| CBT vs. Sertraline+CBT                                             | 0.24               | 0.83           | -0.78                | 47.11          | 1.02                   | 47.12          | 0.98     |
| CBT vs. Fluoxetine+CBT                                             | 0.54               | 0.95           | -0.86                | 89.21          | 1.40                   | 89.22          | 0.99     |
| Waitlistingno treatment vs. / Attention control/treatment as usual | 1.74               | 1.24           | 0.69                 | 0.53           | 1.05                   | 1.36           | 0.44     |

CBT: cognitive behavioral therapy

\*: P value<0.05 suggests no indication of network inconsistency.

**eTable 30.** Pooled effect size and quality of evidence for adverse events (including dropouts, dropouts due to any adverse events, and adverse events)

| Comparison                                | Outcome                                                      | Conclusion                                                    | Study design and sample size <sup>1</sup>           | Factors that affect the quality of evidence <sup>2</sup>          | Overall quality of evidence |
|-------------------------------------------|--------------------------------------------------------------|---------------------------------------------------------------|-----------------------------------------------------|-------------------------------------------------------------------|-----------------------------|
| <b>Medications versus pill placebo</b>    |                                                              |                                                               |                                                     |                                                                   |                             |
| Benzodiazepine vs. Pill Placebo           | Dropouts                                                     | RR: 6.22; 95% CI: 0.38 to 102.94; I <sup>2</sup> =N/A         | 1 RCT (15 Patients) <sup>7</sup>                    | Severe imprecision (small sample size and wide CI)                | Low                         |
| SNRI vs. Pill Placebo                     | Dropouts                                                     | RR: 0.93; 95% CI: 0.70 to 1.25; I <sup>2</sup> =0.0%          | 4 RCTs (786 Patients) <sup>13, 5, 8, 14</sup>       | Methodological limitations, imprecision (wide CIs)                | Low                         |
|                                           | Dropouts due to AEs                                          | RR: 0.99; 95% CI: 0.39 to 2.47; I <sup>2</sup> =7.9%          | 4 RCTs (786 Patients) <sup>13, 5, 8, 14</sup>       | Methodological limitations, imprecision (wide CIs)                | Low                         |
|                                           | Any AEs                                                      | Rate Ratio: 1.55; 95% CI: 0.35 to 6.77; I <sup>2</sup> =94.8% | 3 RCTs (786 Patients) <sup>5, 8, 13</sup>           | Methodological limitations, imprecision (wide CIs)                | Low                         |
|                                           | AEs related to Abdominal/GI/Appetite                         | Rate Ratio: 2.15; 95% CI: 0.63 to 7.34; I <sup>2</sup> =78.8% | 3 RCTs (786 Patients) <sup>5, 8, 13</sup>           | Methodological limitations, imprecision (wide CIs)                | Low                         |
|                                           | AEs related to Accidental Injury                             | Rate Ratio: 1.16; 95% CI: 0.58 to 2.29; I <sup>2</sup> =N/A   | 21 RCTs (320 Patients) <sup>13</sup>                | Methodological limitations, imprecision (wide CIs)                | Low                         |
|                                           | AEs related to Behavior Change                               | Rate Ratio: 1.48; 95% CI: 0.71 to 3.10; I <sup>2</sup> =0.0%  | 2 RCTs (466 Patients) <sup>5, 8</sup>               | Methodological limitations, imprecision (wide CIs)                | Low                         |
|                                           | AEs related to Cold/Infection/Allergies                      | Rate Ratio: 1.05; 95% CI: 0.16 to 7.10; I <sup>2</sup> =83.6% | 3 RCTs (786 Patients) <sup>5, 8, 13</sup>           | Methodological limitations, imprecision (wide CIs), inconsistency | Insufficient                |
|                                           | AEs related to Fatigue/Somnolence                            | Rate Ratio: 2.14; 95% CI: 1.13 to 4.07; I <sup>2</sup> =N/A   | 1 RCT (290 Patients) <sup>8</sup>                   | Imprecision (small sample size)                                   | Moderate                    |
|                                           | AEs related to Headache/Dizziness/Vision Problems            | Rate Ratio: 0.76; 95% CI: 0.52 to 1.11; I <sup>2</sup> =60.2% | 2 RCTs (496 Patients) <sup>5, 13</sup>              | Methodological limitations, imprecision (wide CIs)                | Low                         |
| AEs related to Suicide/Ideation/Self-harm | Rate Ratio: 4.29; 95% CI: 0.48 to 38.44; I <sup>2</sup> =N/A | 1 RCT (290 Patients) <sup>8</sup>                             | Severe imprecision (small sample size and wide CIs) | Low                                                               |                             |

| Comparison            | Outcome                                          | Conclusion                                                    | Study design and sample size <sup>1</sup>                   | Factors that affect the quality of evidence <sup>2</sup>                        | Overall quality of evidence |
|-----------------------|--------------------------------------------------|---------------------------------------------------------------|-------------------------------------------------------------|---------------------------------------------------------------------------------|-----------------------------|
| SSRI vs. Pill Placebo | Dropouts                                         | RR: 0.82; 95% CI: 0.59 to 1.13; I <sup>2</sup> =0.0%          | 7 RCTs (856 Patients) <sup>3,4,9,12,15,17-24</sup>          | Imprecision (wide CIs)                                                          | Moderate                    |
|                       | Dropouts due to AEs                              | RR: 2.60; 95% CI: 0.64 to 10.65; I <sup>2</sup> =0.0%         | 4 RCTs (733 Patients) <sup>3,9,15,17-23</sup>               | Severe imprecision (extremely wide CIs)                                         | Low                         |
|                       | Any AEs                                          | Rate Ratio: 1.28; 95% CI: 0.71 to 2.30; I <sup>2</sup> =79.1% | 8 RCTs (930 Patients) <sup>1,3,4,9,11,12,15,17-23,129</sup> | Imprecision (wide CIs), inconsistency                                           | Low                         |
|                       | AEs related to Abdominal/GI/Appetite             | Rate Ratio: 1.40; 95% CI: 0.68 to 2.87; I <sup>2</sup> =54.8% | 6 RCTs (780 Patients) <sup>1,3,9,12,15,17-23</sup>          | Imprecision (wide CIs)                                                          | Moderate                    |
|                       | AEs related to Behavior Change                   | Rate Ratio: 1.66; 95% CI: 0.92 to 2.98; I <sup>2</sup> =48.2% | 7 RCTs (823 Patients) <sup>1,3,9,11,12,15,17-23</sup>       | Imprecision (wide CIs)                                                          | Moderate                    |
|                       | AEs related to Cold/Infection/Allergies          | Rate Ratio: 1.09; 95% CI: 0.67 to 1.79; I <sup>2</sup> =36.0% | 4 RCTs (684 Patients) <sup>1,9,15,17-23</sup>               | Imprecision (wide CIs)                                                          | Moderate                    |
|                       | AEs related to Difficulties Sleeping             | Rate Ratio: 1.24; 95% CI: 0.42 to 3.69; I <sup>2</sup> =80.5% | 5 RCTs (739 Patients) <sup>1,9,15,17-23,129</sup>           | Imprecision (wide CIs), inconsistency                                           | Low                         |
|                       | AEs related to Fatigue/Somnolence                | Rate Ratio: 1.61; 95% CI: 0.83 to 3.11; I <sup>2</sup> =0.0%  | 4 RCTs (679 Patients) <sup>9,12,15,17-23</sup>              | Methodological limitations, imprecision (wide CIs)                              | Low                         |
|                       | AEs related to Headache/Dizziness/Vision problem | Rate Ratio: 1.24; 95% CI: 0.57 to 2.67; I <sup>2</sup> =21.3% | 4 RCTs (384 Patients) <sup>1,9,12,17-23</sup>               | Methodological limitations, severe imprecision (small sample size and wide CIs) | Insufficient                |
|                       | AEs related to Accidental injury                 | Rate Ratio: 2.29; 95% CI: 0.26 to 20.45; I <sup>2</sup> =N/A  | 1 RCT (209 Patients) <sup>17-23</sup>                       | Severe imprecision (small sample size and wide CIs)                             | Low                         |
|                       | AEs related to Suicide/Ideation/Self-harm        | 0 case in each group                                          | 1 RCT (209 Patients) <sup>17-23</sup>                       | No data                                                                         | Insufficient                |
|                       | AEs related to dry mouth/bad Taste/oral symptoms | Rate Ratio: 1.10; 95% CI: 0.34 to 3.58; I <sup>2</sup> =62.0% | 2 RCTs (47 Patients) <sup>1,12</sup>                        | Severe imprecision (wide CI, small sample size), inconsistency                  | Insufficient                |
| TCA vs. Pill Placebo  | Any AEs                                          | Rate Ratio: 1.39; 95%                                         | 2 RCTs (56 Patients) <sup>6,107</sup>                       | Severe imprecision (small                                                       | Insufficient                |

| Comparison                                 | Outcome                                          | Conclusion                                                        | Study design and sample size <sup>1</sup> | Factors that affect the quality of evidence <sup>2</sup> | Overall quality of evidence |
|--------------------------------------------|--------------------------------------------------|-------------------------------------------------------------------|-------------------------------------------|----------------------------------------------------------|-----------------------------|
|                                            |                                                  | CI: 0.82 to 2.63;<br>I <sup>2</sup> =86.6 %                       |                                           | sample size and wide CI),<br>inconsistency               |                             |
|                                            | AEs related to Abdominal/GI/Appetite             | Rate Ratio: 0.62; 95% CI: 0.21 to 1.86;<br>I <sup>2</sup> =0.0%   | 2 RCTs (56 Patients) <sup>6,107</sup>     | Severe imprecision (small sample size and wide CI)       | Low                         |
|                                            | AEs related to Behavior Change                   | Rate Ratio: 5.45; 95% CI: 0.66 to 45.30;<br>I <sup>2</sup> =0.0%  | 2 RCTs (56 Patients) <sup>6,107</sup>     | Severe imprecision (small sample size and wide CI)       | Low                         |
|                                            | AEs related to Difficulties Sleeping             | Rate Ratio: 0.34; 95% CI: 0.07 to 1.63;<br>I <sup>2</sup> =0.0%   | 2 RCTs (56 Patients) <sup>6,107</sup>     | Severe imprecision (small sample size and wide CI)       | Low                         |
|                                            | AEs related to Fatigue/Somnolence                | Rate Ratio: 2.73; 95% CI: 0.28 to 26.22;<br>I <sup>2</sup> =N/A   | 1 RCT (21 Patients) <sup>107</sup>        | Severe imprecision (small sample size and wide CI)       | Low                         |
|                                            | AEs related to Difficulties Sleeping             | Rate Ratio: 0.34; 95% CI: 0.07 to 1.63;<br>I <sup>2</sup> =0.0%   | 2 RCTs (56 Patients) <sup>6,107</sup>     | Severe imprecision (small sample size and wide CI)       | Low                         |
|                                            | AEs related to dry mouth/bad Taste/oral symptoms | Rate Ratio: 3.81; 95% CI: 1.25 to 11.62;<br>I <sup>2</sup> = 0.0% | 2 RCTs (56 Patients) <sup>6,107</sup>     | Imprecision (small sample size)                          | Moderate                    |
| Atomoxetine (class: SNRI) vs. Pill Placebo | Dropouts                                         | RR: 1.07, 95% CI: 0.64 to 1.79; I <sup>2</sup> =N/A               | 1 RCT (176 Patients) <sup>5</sup>         | Severe imprecision (small sample size and wide CI)       | Low                         |
|                                            | Dropouts due to AEs                              | RR: 0.98, 95% CI: 0.06 to 15.38; I <sup>2</sup> =N/A              | 1 RCT (176 Patients) <sup>5</sup>         | Severe imprecision (small sample size and wide CI)       | Low                         |
|                                            | Any AEs                                          | Rate Ratio: 1.74; 95% CI: 1.17 to 2.61;<br>I <sup>2</sup> =N/A    | 1 RCT (176 Patients) <sup>5</sup>         | Imprecision (small sample size)                          | Moderate                    |
|                                            | AEs related to Abdominal/GI/Appetite             | Rate Ratio: 2.48; 95% CI: 1.31 to 4.71;<br>I <sup>2</sup> =N/A    | 1 RCT (176 Patients) <sup>5</sup>         | Imprecision (small sample size)                          | Moderate                    |
|                                            | AEs related to Behavior Change                   | Rate Ratio: 1.63; 95% CI: 0.39 to 6.82;<br>I <sup>2</sup> =N/A    | 1 RCT (176 Patients) <sup>5</sup>         | Severe imprecision (small sample size and wide CI)       | Low                         |
|                                            | AEs related to Cold/Infection/Allergies          | Rate Ratio: 1.19; 95% CI: 0.59 to 2.41;<br>I <sup>2</sup> =N/A    | 1 RCT (176 Patients) <sup>5</sup>         | Severe imprecision (small sample size and wide CI)       | Low                         |

| Comparison                                          | Outcome                                  | Conclusion                                                     | Study design and sample size <sup>1</sup>   | Factors that affect the quality of evidence <sup>2</sup>                        | Overall quality of evidence |
|-----------------------------------------------------|------------------------------------------|----------------------------------------------------------------|---------------------------------------------|---------------------------------------------------------------------------------|-----------------------------|
|                                                     | AEs related to Headache/Dizziness/Vision | Rate Ratio: 1.54; 95% CI:0.60 to 3.96; I <sup>2</sup> =N/A     | 1 RCT (176 Patients) <sup>5</sup>           | Severe imprecision (small sample size and wide CI)                              | Low                         |
| Clomipramine (class: TCA) vs. Pill Placebo          | Dropouts                                 | RR: 3.60; 95% CI: 0.16 to 79.00; I <sup>2</sup> =N/A           | 1 RCT (20 Patients) <sup>4</sup>            | Severe imprecision (small sample size and wide CI)                              | Low                         |
|                                                     | Any AEs                                  | Rate Ratio: 0.52; 95% CI: 0.14 to 2.03; I <sup>2</sup> =N/A    | 1 RCT (19 Patients) <sup>4</sup>            | Severe imprecision (small sample size and wide CI)                              | Low                         |
| Clonazepam (class: Benzodiazepine) vs. Pill Placebo | Dropouts                                 | RR: 6.22; 95% CI: 0.38 to 102.94; I <sup>2</sup> =N/A          | 1 RCT (15 Patients) <sup>7</sup>            | Severe imprecision (small sample size and wide CI)                              | Low                         |
| Duloxetine (class: SNRI) vs. Pill Placebo           | Dropouts                                 | RR: 1.02; 95% CI: 0.76 to 1.35; I <sup>2</sup> =N/A            | 1 RCT (272 Patients) <sup>14</sup>          | Severe imprecision (small sample size and wide CI)                              | Low                         |
|                                                     | Dropouts due to AEs                      | RR: 1.17; 95% CI: 0.58 to 2.37; I <sup>2</sup> =N/A            | 1 RCT (272 Patients) <sup>14</sup>          | Severe imprecision (small sample size and wide CI)                              | Low                         |
| Fluoxetine (class: SSRI) vs. Pill Placebo           | Dropouts                                 | RR: 1.39; 95% CI:0.38 to 5.09; I <sup>2</sup> =0.0             | 3 RCTs (175 Patients) <sup>3,4,24</sup>     | Methodological limitations, severe imprecision (small sample size and wide CIs) | Insufficient                |
|                                                     | Dropouts due to AEs                      | RR: 3.00; 95% CI: 0.13 to 71.34; I <sup>2</sup> =N/A           | 1 RCT (74 Patients) <sup>3</sup>            | Methodological limitations, severe imprecision (small sample size and wide CIs) | Insufficient                |
|                                                     | Any AEs                                  | Rate Ratio: 2.77; 95% CI: 1.71 to 4.47; I <sup>2</sup> =0.0%   | 2 RCTs (95 Patients) <sup>3,4</sup>         | Methodological limitations, imprecision (small sample size)                     | Low                         |
|                                                     | AEs related to Abdominal/GI/Appetite     | Rate Ratio: 2.29; 95% CI: 0.94 to 5.56; I <sup>2</sup> =N/A    | 1 RCT (74 Patients) <sup>3</sup>            | Methodological limitations, severe imprecision (small sample size and wide CIs) | Insufficient                |
|                                                     | AEs related to Behavior Change           | Rate Ratio: 1.75; 95% CI: 0.51 to 5.98; I <sup>2</sup> =N/A    | 1 RCT (74 Patients) <sup>3</sup>            | Methodological limitations, severe imprecision (small sample size and wide CIs) | Insufficient                |
| Fluvoxamine (class: SSRI) vs. Pill Placebo          | Dropouts                                 | RR: 0.74; 95% CI: 0.35 to 1.54; I <sup>2</sup> =N/A            | 1 RCT (128 Patients) <sup>9</sup>           | Severe imprecision (small sample size and wide CI)                              | Low                         |
|                                                     | Dropouts due to AEs                      | RR: 5.16; 95% CI: 0.62 to 42.93; I <sup>2</sup> =N/A           | 1 RCT (128 Patients) <sup>9</sup>           | Severe imprecision (small sample size and wide CI)                              | Low                         |
|                                                     | Any AEs                                  | Rate Ratio: 1.18; 95% CI: 0.15 to 9.45; I <sup>2</sup> =83.5 % | 4 RCTs (303 Patients) <sup>1,9,11,129</sup> | Severe imprecision (small sample size and wide CI)                              | Low                         |

| Comparison                               | Outcome                                          | Conclusion                                                      | Study design and sample size <sup>1</sup> | Factors that affect the quality of evidence <sup>2</sup>          | Overall quality of evidence |
|------------------------------------------|--------------------------------------------------|-----------------------------------------------------------------|-------------------------------------------|-------------------------------------------------------------------|-----------------------------|
|                                          | AEs related to Abdominal/GI/Appetite             | Rate Ratio: 1.58; 95% CI: 1.13 to 2.20; I <sup>2</sup> =0.0%    | 2 RCTs (153 Patients) <sup>1,9</sup>      | Imprecision (small sample size)                                   | Moderate                    |
|                                          | AEs related to Behavior Change                   | Rate Ratio: 2.12; 95% CI: 0.08 to 54.36; I <sup>2</sup> =79.0 % | 3 RCTs (198 Patients) <sup>1,9,11</sup>   | Severe imprecision (small sample size and wide CI), inconsistency | Insufficient                |
|                                          | AEs related to Cold/Infection/Allergies          | Rate Ratio: 1.05; 95% CI: 0.75 to 1.47; I <sup>2</sup> =53.1%   | 2 RCTs (153 Patients) <sup>1,9</sup>      | Severe imprecision (small sample size and wide CI)                | Low                         |
|                                          | AEs related to Difficulties Sleeping             | Rate Ratio: 0.76; 95% CI: 0.14 to 3.86; I <sup>2</sup> =55.2%   | 3 RCTs (258 Patients) <sup>1,9,129</sup>  | Severe imprecision (small sample size and wide CI)                | Low                         |
|                                          | AEs related to Headache/Dizziness/Vision         | Rate Ratio:1.22; 95% CI: 0.74 to 2.00; I <sup>2</sup> =0.0%     | 2 RCTs (153 Patients) <sup>1,9</sup>      | Severe imprecision (small sample size and wide CI)                | Low                         |
|                                          | AEs related to Fatigue/Somnolence                | Rate Ratio: 1.65; 95% CI: 0.87 to 3.15; I <sup>2</sup> =N/A     | 1 RCT (128 Patients) <sup>9</sup>         | Severe imprecision (small sample size and wide CI)                | Low                         |
|                                          | AEs related to dry mouth/bad Taste/oral symptoms | Rate Ratio: 0.22; 95% CI: 0.02 to 2.13; I <sup>2</sup> =N/A     | 1 RCT (25 Patients) <sup>1</sup>          | Severe imprecision (small sample size and wide CI)                | Low                         |
| Imipramine (class: TCA) vs. Pill Placebo | Any AEs                                          | Rate Ratio: 1.4; 95% CI: 0.82 to 2.63; I <sup>2</sup> =86.6 %   | 2 RCTs (56 Patients) <sup>6,107</sup>     | Severe imprecision (small sample size and wide CI), inconsistency | Insufficient                |
|                                          | AEs related to Abdominal/GI/Appetite             | Rate Ratio: 0.62; 95% CI: 0.21 to 1.86; I <sup>2</sup> =0.0%    | 2 RCTs (56 Patients) <sup>6,107</sup>     | Severe imprecision (small sample size and wide CI)                | Low                         |
|                                          | AEs related to Behavior Change                   | Rate Ratio: 5.45; 95% CI: 0.66 to 45.30; I <sup>2</sup> =0.0%   | 2 RCTs (56 Patients) <sup>6,107</sup>     | Severe imprecision (small sample size and wide CI)                | Low                         |
|                                          | AEs related to Difficulties Sleeping             | Rate Ratio 0.34; 95% CI: 0.07 to1.63; I <sup>2</sup> =0.0%      | 2 RCTs (56 Patients) <sup>6,107</sup>     | Severe imprecision (small sample size and wide CI)                | Low                         |
|                                          | AEs related to Fatigue/Somnolence                | Rate Ratio: 2.73; 95% CI: 0.28 to 26.22; I <sup>2</sup> =N/A    | 1 RCT (21 Patients) <sup>107</sup>        | Severe imprecision (small sample size and wide CI)                | Low                         |

| Comparison                                | Outcome                                          | Conclusion                                                     | Study design and sample size <sup>1</sup> | Factors that affect the quality of evidence <sup>2</sup>                        | Overall quality of evidence |
|-------------------------------------------|--------------------------------------------------|----------------------------------------------------------------|-------------------------------------------|---------------------------------------------------------------------------------|-----------------------------|
|                                           | AEs related to Difficulties Sleeping             | Rate Ratio: 0.34; 95% CI: 0.07 to 1.63; I <sup>2</sup> =0.0%   | 2 RCTs (56 Patients) <sup>6,107</sup>     | Severe imprecision (small sample size and wide CI)                              | Low                         |
|                                           | AEs related to dry mouth/bad Taste/oral symptoms | Rate Ratio: 3.81; 95% CI: 1.25 to 11.62; I <sup>2</sup> = 0.0% | 2 RCTs (56 Patients) <sup>6,107</sup>     | Imprecision (small number of patients)                                          | Moderate                    |
| Paroxetine (class: SSRI) vs. Pill Placebo | Dropouts                                         | RR: 0.71; 95% CI: 0.50 to 1.02; I <sup>2</sup> =N/A            | 1 RCT (322 Patients) <sup>15</sup>        | Severe imprecision (small sample size and wide CI)                              | Low                         |
|                                           | Dropouts due to AEs                              | RR: 4.28; 95% CI: 0.94 to 19.51; I <sup>2</sup> =N/A           | 1 RCT (322 Patients) <sup>15</sup>        | Severe imprecision (small sample size and wide CI)                              | Low                         |
|                                           | Any AEs                                          | Rate Ratio: 1.85; 95% CI: 1.45 to 2.35; I <sup>2</sup> =N/A    | 1 RCT (210 Patients) <sup>15</sup>        | Imprecision (small sample size)                                                 | Moderate                    |
|                                           | AEs related to Abdominal/GI/Appetite             | Rate Ratio: 3.49; 95% CI: 0.97 to 12.51; I <sup>2</sup> =N/A   | 1 RCT (322 Patients) <sup>15</sup>        | Severe imprecision (small sample size and wide CI)                              | Low                         |
|                                           | AEs related to Behavior Change                   | Rate Ratio: 2.16; 95% CI: 1.06 to 4.40; I <sup>2</sup> =N/A    | 1 RCT (322 Patients) <sup>15</sup>        | Severe imprecision (small sample size and wide CI)                              | Low                         |
|                                           | AEs related to Cold/Infection/Allergies          | Rate Ratio: 2.00; 95% CI: 1.39 to 2.89; I <sup>2</sup> =N/A    | 1 RCT (274 Patients) <sup>15</sup>        | Imprecision (small sample size)                                                 | Moderate                    |
|                                           | AEs related to Difficulties Sleeping             | Rate Ratio: 6.17; 95% CI: 3.58 to 10.63; I <sup>2</sup> =N/A   | 1 RCT (157 Patients) <sup>15</sup>        | Imprecision (small sample size)                                                 | Moderate                    |
|                                           | AEs related to Fatigue/Somnolence                | Rate Ratio: 1.52; 95% CI: 0.76 to 3.03; I <sup>2</sup> =N/A    | 1 RCT (320 Patients) <sup>15</sup>        | Severe imprecision (small sample size and wide CI)                              | Low                         |
| Sertraline (class: SSRI) vs. Pill Placebo | Dropouts                                         | RR: 0.73; 95% CI: 0.38 to 1.42; I <sup>2</sup> =0.0%           | 2 RCTs (231 Patients) <sup>12,17-23</sup> | Methodological limitations, severe imprecision (small sample size and wide CIs) | Insufficient                |
|                                           | Dropouts due to AEs                              | RR: 1.33; 95% CI: 0.36 to 5.00; I <sup>2</sup> =N/A            | 1 RCT (209 Patients) <sup>17-23</sup>     | Severe imprecision (small sample size and wide CI)                              | Low                         |
|                                           | Any AEs                                          | Rate Ratio: 1.2 95% CI: 0.94 to 1.55; I <sup>2</sup> =50.1%    | 2 RCTs (231 Patients) <sup>12,17-23</sup> | Methodological limitations, severe imprecision (small sample size and wide CIs) | Insufficient                |



| Comparison                    | Outcome                                          | Conclusion                                                    | Study design and sample size <sup>1</sup>            | Factors that affect the quality of evidence <sup>2</sup> | Overall quality of evidence |
|-------------------------------|--------------------------------------------------|---------------------------------------------------------------|------------------------------------------------------|----------------------------------------------------------|-----------------------------|
|                               | AEs related to Abdominal/GI/Appetite             | Rate Ratio: 0.88; 95% CI: 0.50 to 1.53; I <sup>2</sup> =78.6% | 2 RCTs (231 Patients) <sup>12,17-23</sup>            | Severe imprecision (small sample size and wide CI)       | Low                         |
|                               | AEs related to Behavior Change                   | Rate Ratio: 1.57; 95% CI: 0.88 to 2.81; I <sup>2</sup> =0.00% | 2 RCTs (231 Patients) <sup>12,17-23</sup>            | Severe imprecision (small sample size and wide CI)       | Low                         |
|                               | AEs related to Cold/Infection/Allergies          | Rate Ratio: 0.86; 95% CI: 0.49 to 1.51; I <sup>2</sup> =N/A   | 1 RCT (209 Patients) <sup>17-23</sup>                | Severe imprecision (small sample size and wide CI)       | Low                         |
|                               | AEs related to Difficulties Sleeping             | Rate Ratio: 1.94; 95% CI: 0.72 to 5.27; I <sup>2</sup> =N/A   | 1 RCT (209 Patients) <sup>17-23</sup>                | Severe imprecision (small sample size and wide CI)       | Low                         |
|                               | AEs related to Fatigue/Somnolence                | Rate Ratio: 1.68; 95% CI: 0.76 to 3.74; I <sup>2</sup> =0.0%  | 2 RCTs (231 Patients) <sup>12,17-23</sup>            | Severe imprecision (small sample size and wide CI)       | Low                         |
|                               | AEs related to Headache/Dizziness/Vision         | Rate Ratio: 1.29; 95% CI: 0.59 to 2.85; I <sup>2</sup> =72.6% | 2 RCTs (231 Patients) <sup>12,17-23</sup>            | Severe imprecision (small sample size and wide CI)       | Low                         |
|                               | AEs related to Accidental Injury                 | Rate Ratio: 2.29; 95% CI: 0.26 to 20.45; I <sup>2</sup> =N/A  | 1 RCT (209 patients) <sup>17-23</sup>                | Severe imprecision (small sample size and wide CI)       | Low                         |
|                               | AEs related to Suicide/Ideation/Self-Harm        | 0 case in each group                                          | 1 RCT (209 patients) <sup>17-23</sup>                | No data                                                  | Insufficient                |
|                               | AEs related to dry mouth/bad Taste/oral symptoms | Rate Ratio: 2.0; 95% CI: 0.50 to 8.0; I <sup>2</sup> =N/A     | 1 RCT (22 patients) <sup>12</sup>                    | Severe imprecision (small sample size and wide CI)       | Low                         |
|                               | Venlafaxine (class: SNRI) vs. Pill Placebo       | Dropouts                                                      | RR: 0.84; 95% CI: 0.65 to 1.09; I <sup>2</sup> =0.0% | 2 RCTs (610 Patients) <sup>13, 8</sup>                   | Imprecision (wide CIs)      |
| Dropouts due to AEs           |                                                  | RR: 0.78; 95% CI: 0.36 to 1.66; I <sup>2</sup> =64.9%         | 2 RCTs (610 Patients) <sup>8,13</sup>                | Imprecision (wide CIs), inconsistency                    | Low                         |
| Any AEs                       |                                                  | Rate Ratio: 1.13; 95% CI: 0.98 to 1.31; I <sup>2</sup> =97.5% | 2 RCTs (610 Patients) <sup>8,13</sup>                | Imprecision (wide CIs), inconsistency                    | Low                         |
| AEs related to Abdominal/GI/A |                                                  | Rate Ratio: 1.92; 95% CI: 1.44 to 2.57;                       | 2 RCTs (610 Patients) <sup>8,13</sup>                | Inconsistency                                            | Moderate                    |

| Comparison                                                                                                                                                                                   | Outcome                                   | Conclusion                                           | Study design and sample size <sup>1</sup> | Factors that affect the quality of evidence <sup>2</sup>          | Overall quality of evidence |
|----------------------------------------------------------------------------------------------------------------------------------------------------------------------------------------------|-------------------------------------------|------------------------------------------------------|-------------------------------------------|-------------------------------------------------------------------|-----------------------------|
|                                                                                                                                                                                              | Appetite                                  | $I^2=88.8\%$                                         |                                           |                                                                   |                             |
|                                                                                                                                                                                              | AEs related to Behavior Change            | Rate Ratio 1.43; 95% CI: 0.60 to 3.39; $I^2=N/A$     | 1 RCT (290 Patients) <sup>8</sup>         | Severe imprecision (small sample size and wide CI)                | Low                         |
|                                                                                                                                                                                              | AEs related to Cold/Infection/Allergies   | Rate Ratio: 0.87; 95% CI: 0.57 to 1.32; $I^2=91.4\%$ | 2 RCTs (610 Patients) <sup>8,13</sup>     | Severe imprecision (small sample size and wide CI), inconsistency | Insufficient                |
|                                                                                                                                                                                              | AEs related to Fatigue/Somnolence         | Rate Ratio: 2.14; 95% CI: 1.13 to 4.07; $I^2=N/A$    | 1 RCT (290 Patients) <sup>8</sup>         | Imprecision (small sample size)                                   | Moderate                    |
|                                                                                                                                                                                              | AEs related to Headache/Dizziness/Vision  | Rate Ratio: 0.67; 95% CI: 0.44 to 1.01; $I^2=N/A$    | 1 RCT (320 Patients) <sup>13</sup>        | Severe imprecision (small sample size and wide CI)                | Low                         |
|                                                                                                                                                                                              | AEs related to Suicide/Ideation/Self-harm | Rate Ratio: 4.29; 95% CI: 0.48 to 38.34; $I^2=N/A$   | 1 RCT (290 Patients) <sup>8</sup>         | Severe imprecision (small sample size and wide CI)                | Low                         |
|                                                                                                                                                                                              | AEs related to Accidental Injury          | Rate Ratio: 1.16; 95% CI: 0.58 to 2.29; $I^2=N/A$    | 1 RCT (320 Patients) <sup>13</sup>        | Severe imprecision (small sample size and wide CI)                | Low                         |
| <b>Medications versus medications, CBT versus pill placebo, CBT versus waitlisting/no treatment, CBT versus attention control/treatment as usual, and combination of CBT and medications</b> |                                           |                                                      |                                           |                                                                   |                             |
| TCA vs. SSRI                                                                                                                                                                                 | Dropouts                                  | RR: 0.56; 95% CI: 0.06 to 5.14; $I^2=N/A$            | 1 RCT (19 Patients) <sup>4</sup>          | Severe imprecision (small sample size and wide CI)                | Low                         |
|                                                                                                                                                                                              | Any AEs                                   | Rate Ratio: 6.90; 95% CI: 2.10 to 22.98; $I^2=N/A$   | 1 RCT (19 Patients) <sup>4</sup>          | Severe imprecision (small sample size and wide CI)                | Low                         |
| Clomipramine (class: TCA) vs. Fluoxetine (class: SSRI)                                                                                                                                       | Dropouts                                  | RR: 0.56; 95% CI: 0.06 to 5.14; $I^2=N/A$            | 1 RCT (19 Patients) <sup>4</sup>          | Severe imprecision (small sample size and wide CI)                | Low                         |
|                                                                                                                                                                                              | Any AEs                                   | Rate Ratio: 6.90; 95% CI: 2.10 to 22.98; $I^2=N/A$   | 1 RCT (19 Patients) <sup>4</sup>          | Severe imprecision (small sample size and wide CI)                | Low                         |
| Sertraline (class: SSRI) vs Paroxetine (class: SSRI)                                                                                                                                         | Any AEs                                   | Rate Ratio: 5.00; 95% CI 0.31 to 79.94; $I^2=N/A$    | 1 RCT (19 patients) <sup>4</sup>          | Severe imprecision (small sample size and wide CI)                | Low                         |
| Fluoxetine (class: SSRI) vs. CBT                                                                                                                                                             | Dropouts                                  | RR: 1.26; 95% CI: 0.61 to 2.58; $I^2=N/A$            | 1 RCT (102 Patients) <sup>24</sup>        | Severe imprecision (small sample size and wide CI)                | Low                         |

| Comparison                      | Outcome                                    | Conclusion                                                   | Study design and sample size <sup>1</sup> | Factors that affect the quality of evidence <sup>2</sup>                       | Overall quality of evidence |
|---------------------------------|--------------------------------------------|--------------------------------------------------------------|-------------------------------------------|--------------------------------------------------------------------------------|-----------------------------|
| Sertraline (class: SSRI) vs CBT | Dropouts                                   | RR: 2.79; 95% CI: 1.12 to 6.91; I <sup>2</sup> =N/A          | 1 RCT (272 Patients) <sup>17-23</sup>     | Methodological limitations, imprecision (small sample size)                    | Low                         |
|                                 | Dropouts due to AEs                        | RR: 15.67; 95% CI: 0.90 to 271.71; I <sup>2</sup> =N/A       | 1 RCT (272 Patients) <sup>17-23</sup>     | Methodological limitations, severe imprecision (small sample size and wide CI) | Insufficient                |
|                                 | Any AEs                                    | Rate Ratio: 1.39; 95% CI: 1.09 to 1.77; I <sup>2</sup> =N/A  | 1 RCT (272 Patients) <sup>17-23</sup>     | Methodological limitations, imprecision (small sample size)                    | Low                         |
|                                 | AEs related to Abdominal/GI/A ppetite      | Rate Ratio: 0.71; 95% CI: 0.41 to 1.20; I <sup>2</sup> =0.0% | 2 RCT (274 Patients) <sup>17-23,120</sup> | Methodological limitations, severe imprecision (small sample size and wide CI) | Insufficient                |
|                                 | AEs related to Behavior Change             | Rate Ratio: 2.09; 95% CI: 1.17 to 3.74; I <sup>2</sup> =0.0% | 2 RCT (321 Patients) <sup>16-23</sup>     | Methodological limitations, imprecision (small sample size)                    | Low                         |
|                                 | AEs related to Cold/Infection/ Allergies   | Rate Ratio: 0.64; 95% CI: 0.41 to 1.01; I <sup>2</sup> =N/A  | 1 RCT (272 Patients) <sup>17-23</sup>     | Severe imprecision (small sample size and wide CI)                             | Low                         |
|                                 | AEs related to Difficulties sleeping       | Rate Ratio: 4.44; 95% CI: 1.50 to 13.20; I <sup>2</sup> =N/A | 1 RCT (272 Patients) <sup>17-23</sup>     | Imprecision (small sample size)                                                | Moderate                    |
|                                 | AEs related to Headache/Dizz y/Vision      | Rate Ratio: 1.83; 95% CI: 0.90 to 3.72; I <sup>2</sup> =N/A  | 1 RCT (272 Patients) <sup>17-23</sup>     | Severe imprecision (small sample size and wide CI)                             | Low                         |
|                                 | AEs related to Accidental Injury           | Rate Ratio: 1.05; 95% CI: 0.26 to 4.18; I <sup>2</sup> =N/A  | 1 RCT (272 Patients) <sup>17-23</sup>     | Severe imprecision (small sample size and wide CI)                             | Low                         |
|                                 | AEs related to Suicide/Ideatio n/Self-harm | 0 events                                                     | 1 RCT (272 Patients) <sup>17-23</sup>     | No data                                                                        | Insufficient                |
| CBT vs. Pill Placebo            | Dropouts                                   | RR: 0.53; 95% CI: 0.30 to 0.95; I <sup>2</sup> =74.4 %       | 2 RCTs (311 Patients) <sup>17-24</sup>    | Severe imprecision (small sample size and wide CI)                             | Low                         |
|                                 | Dropouts due to AEs                        | RR: 0.08; 95% CI: 0.00 to 1.50; I <sup>2</sup> =N/A          | 1 RCT (215 Patients) <sup>17-23</sup>     | Severe imprecision (small sample size and wide CI)                             | Low                         |
|                                 | Any AEs                                    | Rate Ratio: 0.97; 95% CI: 0.71 to 1.3; I <sup>2</sup> =N/A   | 1 RCT (215 Patients) <sup>17-23</sup>     | Severe imprecision (small sample size and wide CI)                             | Low                         |

| Comparison                                      | Outcome                                   | Conclusion                                                   | Study design and sample size <sup>1</sup>                                                                        | Factors that affect the quality of evidence <sup>2</sup>    | Overall quality of evidence |
|-------------------------------------------------|-------------------------------------------|--------------------------------------------------------------|------------------------------------------------------------------------------------------------------------------|-------------------------------------------------------------|-----------------------------|
|                                                 | AEs related to Abdominal/GI/Appetite      | Rate Ratio: 0.84; 95% CI: 0.44 to 1.61; I <sup>2</sup> =N/A  | 1 RCT (215 Patients) <sup>17-23</sup>                                                                            | Severe imprecision (small sample size and wide CI)          | Low                         |
|                                                 | AEs related to Behavior Change            | Rate Ratio: 0.72; 95% CI: 0.35 to 1.47; I <sup>2</sup> =N/A  | 1 RCT (215 Patients) <sup>17-23</sup>                                                                            | Severe imprecision (small sample size and wide CI)          | Low                         |
|                                                 | AEs related to Cold/Infection/Allergies   | Rate Ratio: 1.34; 95% CI: 0.80 to 2.25; I <sup>2</sup> =N/A  | 1 RCT (215 Patients) <sup>17-23</sup>                                                                            | Severe imprecision (small sample size and wide CI)          | Low                         |
|                                                 | AEs related to Difficulties Sleeping      | Rate Ratio: 0.44; 95% CI: 0.12 to 1.63; I <sup>2</sup> =N/A  | 1 RCT (215 Patients) <sup>17-23</sup>                                                                            | Severe imprecision (small sample size and wide CI)          | Low                         |
|                                                 | AEs related to Headache/Dizziness/Vision  | Rate Ratio: 1.09; 95% CI: 0.41 to 2.92; I <sup>2</sup> =N/A  | 1 RCT (215 Patients) <sup>17-23</sup>                                                                            | Severe imprecision (small sample size and wide CI)          | Low                         |
|                                                 | AEs related to Suicide/Ideation/Self-harm | Rate Ratio: 2.73; 95% CI: 0.32 to 23.40; I <sup>2</sup> =N/A | 1 RCT (215 Patients) <sup>17-23</sup>                                                                            | Severe imprecision (small sample size and wide CI)          | Low                         |
|                                                 | AEs related to Accidental Injury          | Rate Ratio: 2.19; 95% CI: 0.24 to 19.57; I <sup>2</sup> =N/A | 1 RCT (215 Patients) <sup>17-23</sup>                                                                            | Severe imprecision (small sample size and wide CI)          | Low                         |
| CBT vs. Waitlisting or No Treatment             | Dropouts                                  | RR: 1.19; 95% CI: 0.81 to 1.73; I <sup>2</sup> =14.52 %      | 29 RCTs (1345 Patients) <sup>26-29,33,34,37-39,44-46,51,52,54,56,64,66,67,73-77,79,80,84,85</sup>                | Methodological limitations, imprecision (wide CI)           | Low                         |
|                                                 | Dropouts due to AEs                       | RR: 0.31; 95% CI: 0.12 to 0.79; I <sup>2</sup> =NA           | 1 RCT (125 Patients) <sup>43</sup>                                                                               | Methodological limitations, imprecision (small sample size) | Low                         |
| CBT vs. Attention Control or Treatment As Usual | Dropouts                                  | RR: 0.87; 95% CI: 0.65 to 1.16 I <sup>2</sup> =0.0%          | 16 RCTs and 1 non-randomized comparative study (1053 Patients) <sup>56,62,86,87,89-92,94-96,98,100,102-105</sup> | Methodological limitations, imprecision (wide CI)           | Low                         |
| CBT+ Sertraline (class: SSRI) vs. CBT           | Dropouts                                  | RR: 1.99; 95% CI: 0.77 to 5.14; I <sup>2</sup> =N/A          | 1 RCT and 1 non-randomized comparative study (327 patients) <sup>17-23,130</sup>                                 | Severe imprecision (small sample size and wide CIs)         | Low                         |

| Comparison                           | Outcome                                                    | Conclusion                                                  | Study design and sample size <sup>1</sup>           | Factors that affect the quality of evidence <sup>2</sup> | Overall quality of evidence                         |
|--------------------------------------|------------------------------------------------------------|-------------------------------------------------------------|-----------------------------------------------------|----------------------------------------------------------|-----------------------------------------------------|
|                                      | Dropouts due to AEs                                        | RR: 2.98; 95% CI: 0.12 to 72.50; I <sup>2</sup> =N/A        | 1 RCT (279 patients) <sup>17-23</sup>               | Severe imprecision (small sample size and wide CIs)      | Low                                                 |
|                                      | Any AEs                                                    | Rate Ratio:1.67; 95% CI: 1.32 to 2.07 I <sup>2</sup> =N/A   | 1 RCT (279 Patients) <sup>17-23</sup>               | Severe imprecision (small sample size and wide CIs)      | Low                                                 |
|                                      | AEs related to Abdominal/GI/Appetite                       | Rate Ratio: 1.42; 95% CI: 0.84 to 2.42; I <sup>2</sup> =N/A | 1 RCT (279 Patients) <sup>17-23</sup>               | Severe imprecision (small sample size and wide CIs)      | Low                                                 |
|                                      | AEs related to Behavior Change                             | Rate Ratio: 3.80; 95% CI: 2.23 to 6.48; I <sup>2</sup> =N/A | 1 RCT (279 Patients) <sup>17-23</sup>               | Imprecision (small sample size)                          | Moderate                                            |
|                                      | AEs related to Cold/Infection/Allergies                    | Rate Ratio: 0.95; 95% CI: 0.64 to 1.42; I <sup>2</sup> =N/A | 1 RCT (279 Patients) <sup>17-23</sup>               | Severe imprecision (small sample size and wide CIs)      | Low                                                 |
|                                      | AEs related to Difficulties Sleeping                       | Rate Ratio: 3.23; 95% CI: 1.05 to 9.90; I <sup>2</sup> =N/A | 1 RCT (279 Patients) <sup>17-23</sup>               | Severe imprecision (small sample size and wide CIs)      | Low                                                 |
|                                      | AEs related to Headache/Dizziness/Vision                   | Rate Ratio: 1.49; 95% CI: 0.72 to 3.09; I <sup>2</sup> =N/A | 1 RCT (279 Patients) <sup>17-23</sup>               | Severe imprecision (small sample size and wide CIs)      | Low                                                 |
|                                      | AEs related to Suicide/Ideation/Self-harm                  | Rate Ratio: 0.99; 95% CI: 0.29 to 3.43; I <sup>2</sup> =N/A | 1 RCT (279 Patients) <sup>17-23</sup>               | Severe imprecision (small sample size and wide CIs)      | Low                                                 |
|                                      | AEs related to Accidental Injury                           | Rate Ratio: 1.00; 95% CI: 0.25 to 3.8; I <sup>2</sup> =N/A  | 1 RCT (279 Patients) <sup>17-23</sup>               | Severe imprecision (small sample size and wide CIs)      | Low                                                 |
|                                      | CBT+ Sertraline (class: SSRI) vs. Sertraline (class: SSRI) | Dropouts                                                    | RR: 0.71; 95% CI: 0.35 to 1.45; I <sup>2</sup> =N/A | 1 RCT (273 Patients) <sup>17-23</sup>                    | Severe imprecision (small sample size and wide CIs) |
| Dropouts due to AEs                  |                                                            | RR: 0.14; 95% CI: 0.02 to 1.09; I <sup>2</sup> =N/A         | 1 RCT (273 Patients) <sup>17-23</sup>               | Severe imprecision (small sample size and wide CIs)      | Low                                                 |
| Any AEs                              |                                                            | Rate Ratio: 1.2; 95% CI: 0.97 to 1.45; I <sup>2</sup> =N/A  | 1 RCT (273 Patients) <sup>17-23</sup>               | Severe imprecision (small sample size and wide CIs)      | Low                                                 |
| AEs related to Abdominal/GI/Appetite |                                                            | Rate Ratio: 1.01; 95% CI: 0.62 to 1.65; I <sup>2</sup> =N/A | 1 RCT (273 Patients) <sup>17-23</sup>               | Severe imprecision (small sample size and wide CIs)      | Low                                                 |
| AEs related to                       |                                                            | Rate Ratio: 1.82; 95%                                       | 1 RCT (273 Patients) <sup>17-23</sup>               | Imprecision (small sample size)                          | Moderate                                            |

| Comparison                            | Outcome                                   | Conclusion                                                  | Study design and sample size <sup>1</sup> | Factors that affect the quality of evidence <sup>2</sup> | Overall quality of evidence |
|---------------------------------------|-------------------------------------------|-------------------------------------------------------------|-------------------------------------------|----------------------------------------------------------|-----------------------------|
|                                       | Behavior Change                           | CI: 1.20 to 2.75; I <sup>2</sup> =N/A                       |                                           |                                                          |                             |
|                                       | AEs related to Cold/infection/Allergies   | Rate Ratio: 1.49; 95% CI: 0.94 to 2.35; I <sup>2</sup> =N/A | 1 RCT (273 Patients) <sup>17-23</sup>     | Severe imprecision (small sample size and wide CIs)      | Low                         |
|                                       | AEs related to Difficulties Sleeping      | Rate Ratio: 0.73; 95% CI: 0.35 to 1.50; I <sup>2</sup> =N/A | 1 RCT (273 Patients) <sup>17-23</sup>     | Severe imprecision (small sample size and wide CIs)      | Low                         |
|                                       | AEs related to Fatigue/Somnolence         | Rate Ratio: 0.20; 95% CI: 0.06 to 0.71; I <sup>2</sup> =N/A | 1 RCT (273 Patients) <sup>17-23</sup>     | Imprecision (small sample size)                          | Moderate                    |
|                                       | AEs related to Headache/Dizziness/Vision  | Rate Ratio: 0.81; 95% CI: 0.43 to 1.53; I <sup>2</sup> =N/A | 1 RCT (273 Patients) <sup>17-23</sup>     | Severe imprecision (small sample size and wide CI)       | Low                         |
|                                       | AEs related to Suicide/Ideation/Self-harm | 0 case in each group                                        | 1 RCT (273 Patients) <sup>17-23</sup>     | No data                                                  | Insufficient                |
|                                       | AEs related to Accidental Injury          | Rate Ratio: 0.95; 95% CI: 0.24 to 3.80; I <sup>2</sup> =N/A | 1 RCT (273 Patients) <sup>17-23</sup>     | Severe imprecision (small sample size and wide CI)       | Low                         |
| CBT+ Imipramine (class: TCA) vs. CBT  | Dropouts                                  | RR: 0.80; 95% CI: 0.34 to 1.89; I <sup>2</sup> =N/A         | 1 RCT (63 Patients) <sup>106</sup>        | Severe imprecision (small sample size and wide CI)       | Low                         |
| CBT+ Fluoxetine (class: SSRI) vs. CBT | Dropouts                                  | RR: 1.54; 95% CI: 0.6 to 3.88; I <sup>2</sup> =N/A          | 1 RCT(41 Patients) <sup>108</sup>         | Severe imprecision (small sample size and wide CI)       | Low                         |

AE: adverse event, CBT: cognitive behavioral therapy, CI: confidence interval, GI: gastrointestinal, N/A: not applicable, RCT: randomized controlled trial, RR: relative risk, SNRI: serotonin–norepinephrine reuptake inhibitor, SMD: standardized mean difference, SSRI: selective serotonin reuptake inhibitor, TCA: tricyclic antidepressants

<sup>1</sup>The sample size includes the number of patients from each comparison.

<sup>2</sup> Only QOE domains that led to rating down QOE are reported in this column. Domains that are not reported were satisfactory.

**eTable 31.** Subgroup analysis: age

| Subgroup | Comparison                                      | Outcome                           | Subgroup variable | Conclusion                                                           |
|----------|-------------------------------------------------|-----------------------------------|-------------------|----------------------------------------------------------------------|
| Age      | CBT vs. Attention Control or Treatment as Usual | Primary Anxiety, Child report     | 7-12 years        | SMD: -1.05; 95% CI: -1.99 to -0.11; $I^2 = \text{N/A}$ <sup>97</sup> |
|          |                                                 |                                   | 13-18 years       | SMD: -1.04; 95% CI: -1.65 to -0.42; $I^2 = 60.7\%$ <sup>86,96</sup>  |
|          | CBT vs. Waitlisting or No Treatment             | Primary Anxiety, Clinician report | 7-12 years        | SMD: -0.82; 95% CI: -1.34 to -0.30; $I^2 = 58.9\%$ <sup>37,40</sup>  |
|          |                                                 |                                   | 13-18 years       | SMD: -1.19; 95% CI: -1.87 to -0.52; $I^2 = 0.0\%$ <sup>28,60</sup>   |
|          |                                                 | Primary Anxiety, Child report     | 7-12 years        | SMD: -0.37; 95% CI: -1.17 to 0.43; $I^2 = 0.0\%$ <sup>37,40,55</sup> |
|          |                                                 |                                   | 13-18 years       | SMD: -1.22; 95% CI: -1.89 to -0.55; $I^2 = 0.0\%$ <sup>28,60</sup>   |

CBT: cognitive behavioral therapy, CI: confidence interval, N/A: not applicable, SMD: standardized mean difference

**eTable 32.** Subgroup analysis: comorbidity

| Subgroup    | Comparison                                      | Outcome                           | Subgroup variable | Conclusion                                                                                               |
|-------------|-------------------------------------------------|-----------------------------------|-------------------|----------------------------------------------------------------------------------------------------------|
| Comorbidity | CBT vs. Attention Control or Treatment as Usual | Primary Anxiety, Child report     | Comorbidity       | SMD: -0.31; 95% CI: -0.84 to 0.23; $I^2 = \text{N/A}$ <sup>95</sup>                                      |
|             |                                                 |                                   | No Comorbidity    | SMD: -0.53; 95% CI: -1.49 to 0.44; $I^2 = 74.7\%$ <sup>91,94,96,104</sup>                                |
|             | CBT vs. Waitlisting or No Treatment             | Primary Anxiety, Clinician report | Comorbidity       | SMD: -1.25; 95% CI: -1.79 to -0.70; $I^2 = 93.2\%$ <sup>84,85</sup>                                      |
|             |                                                 |                                   | No Comorbidity    | SMD: -0.83; 95% CI: -1.85 to 0.20; $I^2 = 88.8\%$ <sup>27,28,35,37,40,43,45,78,79,82,83,131</sup>        |
|             |                                                 | Primary Anxiety, Child report     | Comorbidity       | SMD: -0.85; 95% CI: -2.82 to 1.12; $I^2 = 90.0\%$ <sup>33,53,67,85</sup>                                 |
|             |                                                 |                                   | No Comorbidity    | SMD: -0.42; 95% CI: -0.78 to -0.07; $I^2 = 74.4\%$ <sup>27,28,35,37-40,43,45,47,48,78,79,82,83,131</sup> |
|             |                                                 | Primary Anxiety, Parent report    | Comorbidity       | SMD: -1.82; 95% CI: -4.44 to 0.80; $I^2 = 0.90.5\%$ <sup>33,53,67,85</sup>                               |
|             |                                                 |                                   | No Comorbidity    | SMD: -0.63; 95% CI: -1.15 to -0.12; $I^2 = 76.7\%$ <sup>27,37-39,45,47,48,78,79,82,83</sup>              |
|             |                                                 | Response                          | Comorbidity       | RR: 12.69; 95% CI: 0.81 to 198.10; $I^2 = \text{N/A}$ <sup>53</sup>                                      |
|             |                                                 |                                   | No Comorbidity    | RR: 10.16; 95% CI: 2.98 to 34.66; $I^2 = 0.0\%$ <sup>38,39,45,48,131</sup>                               |
|             | Fluvoxamine vs. Pill Placebo                    | Primary Anxiety, Clinician report | Comorbidity       | SMD: -0.30; 95% CI: -1.11 to 0.51; $I^2 = \text{N/A}$ <sup>1</sup>                                       |
|             |                                                 |                                   | No Comorbidity    | SMD: -1.11; 95% CI: -1.49 to -0.74; $I^2 = \text{N/A}$ <sup>9</sup>                                      |

CBT: cognitive behavioral therapy, CI: confidence interval, N/A: not applicable, RR: risk ratio, SMD: standardized mean difference



**eTable 33.** Subgroup analysis: ADHD

| Subgroup | Comparison                   | Outcome                           | Subgroup variable | Conclusion                                                          |
|----------|------------------------------|-----------------------------------|-------------------|---------------------------------------------------------------------|
| ADHD     | Fluvoxamine vs. Pill Placebo | Primary Anxiety, Clinician report | ADHD              | SMD: -0.30; 95% CI: -1.11 to 0.51; $I^2 = \text{N/A}$ <sup>1</sup>  |
|          |                              |                                   | No ADHD           | SMD: -1.11; 95% CI: -1.49 to -0.74; $I^2 = \text{N/A}$ <sup>9</sup> |

ADHD: attention deficit hyperactivity disorder, CI: confidence interval, N/A: not applicable, SMD: standardized mean difference

**eTable 34.** Subgroup analysis: autism

| Subgroup | Comparison                          | Outcome                           | Subgroup variable | Conclusion                                                                                                  |
|----------|-------------------------------------|-----------------------------------|-------------------|-------------------------------------------------------------------------------------------------------------|
| Autism   | CBT vs. Waitlisting or No Treatment | Primary Anxiety, Clinician report | Autism            | SMD: -1.25; 95% CI: -1.79 to -0.70; $I^2 = 93.2\%$ <sup>85,132</sup>                                        |
|          |                                     |                                   | No Autism         | SMD: -0.83; 95% CI: -1.85 to 0.20; $I^2 = 88.8\%$ <sup>27,28,35,37,40,45,78,79,82</sup>                     |
|          |                                     | Primary Anxiety, Child report     | Autism            | SMD: -0.85; 95% CI: -2.82 to 1.12; $I^2 = 90.0\%$ <sup>33,53,67,85</sup>                                    |
|          |                                     |                                   | No Autism         | SMD: -0.42; 95% CI: -0.78 to -0.07; $I^2 = 74.4\%$ <sup>27,28,33,35,37-40,43,45,47,48,78,79,82,83,131</sup> |
|          |                                     | Primary Anxiety, Parent report    | Autism            | SMD: -1.82; 95% CI: -4.44 to 0.80; $I^2 = 90.5\%$ <sup>33,53,67,85</sup>                                    |
|          |                                     |                                   | No Autism         | SMD: -0.62; 95% CI: -1.14 to -0.10; $I^2 = 74.4\%$ <sup>27,33,37-39,45,47,48,78,79,82,83</sup>              |
|          |                                     | Response                          | Autism            | RR: 12.69; 95% CI: 0.81 to 198.10; $I^2 = \text{N/A}$ <sup>53</sup>                                         |
|          |                                     |                                   | No Autism         | RR: 9.91; 95% CI: 2.25 to 43.65; $I^2 = 0.0\%$ <sup>38,39,45,48,131</sup>                                   |

CBT: cognitive behavioral therapy, CI: confidence interval, N/A: not applicable, RR: risk ratio, SMD: standardized mean difference

**eTable 35.** Subgroup analysis: school refusal

| Subgroup       | Comparison                                      | Outcome                       | Subgroup variable | Conclusion                                                                |
|----------------|-------------------------------------------------|-------------------------------|-------------------|---------------------------------------------------------------------------|
| School Refusal | CBT vs. Attention Control or Treatment as Usual | Primary Anxiety, Child report | School Refusal    | SMD: -0.31; 95% CI: -0.84 to 0.23; $I^2 = \text{N/A}$ <sup>95</sup>       |
|                |                                                 |                               | No School Refusal | SMD: -0.53; 95% CI: -1.49 to 0.44; $I^2 = 74.7\%$ <sup>91,94,96,104</sup> |

CBT: cognitive behavioral therapy, CI: confidence interval, N/A: not applicable, SMD: standardized mean difference

**eTable 36.** Subgroup analysis: diagnosis

| Subgroup  | Comparison                                      | Outcome                             | Subgroup variable                 | Conclusion                                                                                                 |
|-----------|-------------------------------------------------|-------------------------------------|-----------------------------------|------------------------------------------------------------------------------------------------------------|
| Diagnosis | CBT vs. Attention Control or Treatment as Usual | Primary Anxiety, Clinician report   | Panic Disorder                    | SMD: -0.97; 95% CI: -1.79 to -0.15; I <sup>2</sup> = N/A <sup>99</sup>                                     |
|           |                                                 |                                     | Social Anxiety Disorder           | SMD: -0.44; 95% CI: -1.95 to 1.08; I <sup>2</sup> = 73.9% <sup>69,89,104</sup>                             |
|           |                                                 |                                     | Specific Phobias                  | SMD: -0.00; 95% CI: -0.36 to 0.35; I <sup>2</sup> = 87.8% <sup>88,102</sup>                                |
|           |                                                 | Primary Anxiety, Child report       | Panic Disorder                    | SMD: -0.24; 95% CI: -1.02 to 0.53; I <sup>2</sup> = N/A <sup>99</sup>                                      |
|           |                                                 |                                     | Social Anxiety Disorder           | SMD: -0.70; 95% CI: -1.34 to -0.05; I <sup>2</sup> = 66.4% <sup>69,91,96,101,104</sup>                     |
|           |                                                 |                                     | Social Anxiety Disorder           | SMD: -0.65; 95% CI: -2.67 to 1.38; I <sup>2</sup> = 90.3% <sup>69,89,96,104</sup>                          |
|           |                                                 | Primary Anxiety, Parent report      | Specific Phobias                  | SMD: 0.11; 95% CI: -0.45 to 0.68; I <sup>2</sup> = N/A <sup>102</sup>                                      |
|           |                                                 |                                     | Generalized Anxiety               | SMD: -2.42; 95% CI: -3.23 to -1.62; I <sup>2</sup> = N/A <sup>45</sup>                                     |
|           |                                                 | CBT vs. Waitlisting or No Treatment | Primary Anxiety, Clinician report | Panic Disorder                                                                                             |
|           | Social Anxiety Disorder                         |                                     |                                   | SMD: -1.59; 95% CI: -2.38 to -0.80; I <sup>2</sup> = 81.0% <sup>28,37,40,44,51,54,60,64,71,77,133</sup>    |
|           | Specific Phobias                                |                                     |                                   | SMD: -1.01; 95% CI: -1.35 to -0.68; I <sup>2</sup> = 83.2% <sup>57,62</sup>                                |
|           | Generalized Anxiety                             |                                     |                                   | SMD: -0.30; 95% CI: -0.91 to 0.31; I <sup>2</sup> = N/A <sup>45</sup>                                      |
|           | Primary Anxiety, Child report                   |                                     | Separation Anxiety                | SMD: -0.29; 95% CI: -0.89 to 0.32; I <sup>2</sup> = N/A <sup>74</sup>                                      |
|           |                                                 |                                     | Social Anxiety Disorder           | SMD: -1.21; 95% CI: -1.91 to -0.52; I <sup>2</sup> = 87.4% <sup>28,37,40,44,51,54,60,61,64,71,77,133</sup> |
|           |                                                 |                                     | Specific Phobias                  | SMD: -0.08; 95% CI: -0.93 to 0.77; I <sup>2</sup> = 9.4% <sup>50,62,63,134</sup>                           |
|           |                                                 |                                     | Generalized Anxiety               | SMD: -0.14; 95% CI: -0.75 to 0.47; I <sup>2</sup> = N/A <sup>45</sup>                                      |
|           | Primary Anxiety, Parent report                  |                                     | Separation Anxiety                | SMD: -1.27; 95% CI: -1.90 to -                                                                             |

| Subgroup | Comparison                   | Outcome                       | Subgroup variable                                                                 | Conclusion                                                                            |
|----------|------------------------------|-------------------------------|-----------------------------------------------------------------------------------|---------------------------------------------------------------------------------------|
|          |                              |                               |                                                                                   | 0.65; I <sup>2</sup> = 50.0% <sup>25,74</sup>                                         |
|          |                              |                               | Social Anxiety Disorder                                                           | SMD: -0.89; 95% CI: -1.66 to -0.13; I <sup>2</sup> = 72.9% <sup>37,51,61,64,135</sup> |
|          |                              |                               | Specific Phobias                                                                  | SMD: -0.83; 95% CI: -1.45 to -0.21; I <sup>2</sup> = N/A <sup>57</sup>                |
|          |                              | Remission                     | Generalized Anxiety                                                               | RR: 7.67; 95% CI: 0.42 to 139.83; I <sup>2</sup> = N/A <sup>45</sup>                  |
|          |                              |                               | Social Anxiety Disorder                                                           | RR: 11.38; 95% CI: 1.56 to 83.22; I <sup>2</sup> = 0.0% <sup>42,61</sup>              |
|          |                              | Response                      | Generalized Anxiety                                                               | RR: 20.81; 95% CI: 1.29 to 335.97; I <sup>2</sup> = N/A <sup>45</sup>                 |
|          | Social Anxiety Disorder      |                               | RR: 8.42; 95% CI: 3.88 to 18.25; I <sup>2</sup> = 0.0% <sup>44,51,64,77,133</sup> |                                                                                       |
|          | Specific Phobias             |                               | RR: 22.67; 95% CI: 3.24 to 158.60; I <sup>2</sup> = N/A <sup>62</sup>             |                                                                                       |
|          | Venlafaxine vs. Pill Placebo | Primary Anxiety, Child report | Generalized Anxiety                                                               | SMD: -0.52; 95% CI: -0.84 to -0.19; I <sup>2</sup> = N/A <sup>13</sup>                |
|          |                              |                               | Social Anxiety Disorder                                                           | SMD: -0.47; 95% CI: -0.70 to -0.24; I <sup>2</sup> = N/A <sup>8</sup>                 |

CBT: cognitive behavioral therapy, CI: confidence interval, N/A: not applicable, RR: risk ratio, SMD: standardized mean difference

**eTable 37.** Subgroup analysis: treatment settings

| Subgroup                                                                   | Comparison                                      | outcome                             | Subgroup variable                 | Conclusion                                                                                                                               |                                                                                                                                |
|----------------------------------------------------------------------------|-------------------------------------------------|-------------------------------------|-----------------------------------|------------------------------------------------------------------------------------------------------------------------------------------|--------------------------------------------------------------------------------------------------------------------------------|
| Treatment Settings (School, Mental Health Clinic, Outpatient primary care) | CBT vs. Attention Control or Treatment as Usual | Primary Anxiety, Clinician report   | Mental Health Clinic              | SMD: -0.11; 95% CI: -0.55 to 0.33; I <sup>2</sup> = 55.2% <sup>88-90,93,98,102</sup>                                                     |                                                                                                                                |
|                                                                            |                                                 |                                     | School                            | SMD: -0.24; 95% CI: -2.46 to 1.98; I <sup>2</sup> = 84.7% <sup>69,87,104</sup>                                                           |                                                                                                                                |
|                                                                            |                                                 | Primary Anxiety, Child report       | Mental Health Clinic              | SMD: -0.32; 95% CI: -0.66 to 0.01; I <sup>2</sup> = 54.2% <sup>90-93,95,99,100,105,128</sup>                                             |                                                                                                                                |
|                                                                            |                                                 |                                     | School                            | SMD: -0.49; 95% CI: -1.16 to 0.17; I <sup>2</sup> = 66.2% <sup>33,69,87,101,104</sup>                                                    |                                                                                                                                |
|                                                                            |                                                 | Primary Anxiety, Parent report      | Mental Health Clinic              | SMD: 0.08; 95% CI: -0.20 to 0.37; I <sup>2</sup> = 0.0% <sup>89,90,92,93,102,105</sup>                                                   |                                                                                                                                |
|                                                                            |                                                 |                                     | School                            | SMD: -0.68; 95% CI: -2.66 to 1.30; I <sup>2</sup> = 89.6% <sup>69,87,96,104</sup>                                                        |                                                                                                                                |
|                                                                            |                                                 | Remission                           | Mental Health Clinic              | RR: 1.53; 95% CI: 1.11 to 2.11; I <sup>2</sup> = 0.0% <sup>90,103</sup>                                                                  |                                                                                                                                |
|                                                                            |                                                 |                                     | School                            | RR: 2.68; 95% CI: 0.11 to 64.50; I <sup>2</sup> = 64.3% <sup>69,87,104</sup>                                                             |                                                                                                                                |
|                                                                            |                                                 | Response                            | Mental Health Clinic              | RR: 1.50; 95% CI: 1.07 to 2.11; I <sup>2</sup> = 0.0% <sup>90,92,93</sup>                                                                |                                                                                                                                |
|                                                                            |                                                 |                                     | School                            | RR: 1.95; 95% CI: 0.28 to 13.39; I <sup>2</sup> = 79.1% <sup>87,96,104</sup>                                                             |                                                                                                                                |
|                                                                            |                                                 | CBT vs. Waitlisting or No Treatment | Primary Anxiety, Clinician report | Mental Health Clinic                                                                                                                     | SMD: -1.07; 95% CI: -1.66 to -0.47; I <sup>2</sup> = 84.8% <sup>27-29,35,37,40,41,43-46,52,54,57,58,62,64,66,76-82,84,85</sup> |
|                                                                            |                                                 |                                     |                                   | School                                                                                                                                   | SMD: -1.97; 95% CI: -3.26 to -0.68; I <sup>2</sup> = 89.5% <sup>34,49,51,60,71,133</sup>                                       |
|                                                                            | Primary Anxiety, Child report                   |                                     | Mental Health Clinic              | SMD: -0.58; 95% CI: -0.88 to -0.28; I <sup>2</sup> = 83.7% <sup>26-30,33,35,37,38,40,43-45,47,48,50,52-55,61-67,74-79,82,85</sup>        |                                                                                                                                |
|                                                                            |                                                 |                                     | School                            | SMD: -1.32; 95% CI: -2.43 to -0.21; I <sup>2</sup> = 91.4% <sup>34,49,60,71,133</sup>                                                    |                                                                                                                                |
|                                                                            | Primary Anxiety, Parent report                  |                                     | Mental Health Clinic              | SMD: -0.86; 95% CI: -1.23 to -0.48; I <sup>2</sup> = 81.1% <sup>25-27,33,37,38,45-48,52,53,57,58,61,64,66,67,74,76,78,79,82,85,135</sup> |                                                                                                                                |
|                                                                            |                                                 |                                     | School                            | SMD: -0.50; 95% CI: -1.24 to 0.24; I <sup>2</sup> = 0.0% <sup>34,49,51</sup>                                                             |                                                                                                                                |

| Subgroup | Comparison                   | outcome                           | Subgroup variable       | Conclusion                                                                                      |
|----------|------------------------------|-----------------------------------|-------------------------|-------------------------------------------------------------------------------------------------|
|          |                              | Remission                         | Mental Health Clinic    | RR: 2.78; 95% CI: 0.24 to 31.98; I <sup>2</sup> = 76.1% <sup>29,45,61,80</sup>                  |
|          |                              |                                   | School                  | RR: 5.74; 95% CI: 2.17 to 15.20; I <sup>2</sup> = 0.0% <sup>34,45</sup>                         |
|          |                              | Response                          | Mental Health Clinic    | RR: 3.60; 95% CI: 1.77 to 7.32; I <sup>2</sup> = 83.0% <sup>44-48,52,53,62,64,76,77,80,81</sup> |
|          |                              |                                   | School                  | RR: 14.45; 95% CI: 2.94 to 71.01; I <sup>2</sup> = 0.0% <sup>51,133</sup>                       |
|          | Fluvoxamine vs. Pill Placebo | Primary Anxiety, Clinician report | Mental Health Clinic    | SMD: -0.30; 95% CI: -1.11 to 0.51; I <sup>2</sup> = N/A <sup>1</sup>                            |
|          |                              |                                   | Outpatient primary care | SMD: -1.11; 95% CI: -1.49 to -0.74; I <sup>2</sup> = N/A <sup>9</sup>                           |

CBT: cognitive behavioral therapy, CI: confidence interval, N/A: not applicable, RR: risk ratio, SMD: standardized mean difference

**eTable 38.** Subgroup analysis: follow-up less than 6 months

| Subgroup                       | Comparison                                      | Outcome                           | Subgroup variable  | Conclusion                                                                                             |
|--------------------------------|-------------------------------------------------|-----------------------------------|--------------------|--------------------------------------------------------------------------------------------------------|
| Follow up (less than 6 months) | Benzodiazepine vs. Pill Placebo                 | Primary Anxiety, Clinician report | Less than 6 months | SMD: -0.40; 95% CI: -1.43 to 0.63; I <sup>2</sup> =N/A <sup>7</sup>                                    |
|                                | CBT vs. Attention Control or Treatment as Usual | Primary Anxiety, Clinician report | Less than 6 months | SMD: -0.11; 95% CI: -0.52 to 0.30; I <sup>2</sup> =49.9% <sup>87,90,93,98,104</sup>                    |
|                                |                                                 | Primary Anxiety, Child report     | Less than 6 months | SMD: -0.41; 95% CI: -0.88 to 0.07; I <sup>2</sup> = 54.2% <sup>87,90,93,96,100,101,104</sup>           |
|                                |                                                 | Primary Anxiety, Parent report    | Less than 6 months | SMD: 0.16; 95% CI: -0.53 to 0.85; I <sup>2</sup> =76.7% <sup>87,89,90,98,104</sup>                     |
|                                |                                                 | Remission                         | Less than 6 months | RR: 1.52; 95% CI: 0.22 to 10.48; I <sup>2</sup> =74.9% <sup>87,90,104</sup>                            |
|                                |                                                 | Response                          | Less than 6 months | RR: 1.70; 95% CI: 0.34 to 8.53; I <sup>2</sup> =77.9% <sup>87,90,104</sup>                             |
|                                | CBT vs. Waitlisting or No Treatment             | Primary Anxiety, Clinician report | Less than 6 months | SMD: -1.02; 95% CI: -1.65 to -0.38; I <sup>2</sup> =86.1% <sup>29,40,45,49,57,58,62,69,71,73,133</sup> |
|                                |                                                 | Primary Anxiety, Child report     | Less than 6 months | SMD: -1.43; 95% CI: -2.72 to -0.14; I <sup>2</sup> =94.4% <sup>26,29,40,45,49,62,69,71,73,133</sup>    |
|                                |                                                 | Primary Anxiety, Parent report    | Less than 6 months | SMD: -0.93; 95% CI: -2.98 to 1.13; I <sup>2</sup> =85.1% <sup>26,45,49,57,58,69,73</sup>               |
|                                |                                                 | Remission                         | Less than 6 months | RR: 4.38; 95% CI: 0.03 to 598.20; I <sup>2</sup> =78.2% <sup>29,45,69</sup>                            |
|                                |                                                 | Response                          | Less than 6 months | RR: 1.50; 95% CI: 0.71 to 3.17; I <sup>2</sup> =N/A <sup>133</sup>                                     |
|                                | Clonazepam vs. Pill Placebo                     | Primary Anxiety, Clinician report | Less than 6 months | SMD: -0.40; 95% CI: -1.43 to 0.63; I <sup>2</sup> =N/A <sup>7</sup>                                    |

CBT: cognitive behavioral therapy, CI: confidence interval, N/A: not applicable, RR: risk ratio, SMD: standardized mean difference



**eTable 39.** Subgroup analysis: follow-up longer than 6 months

| Subgroup                               | Comparison                                         | Outcome                              | Subgroup variable       | Conclusion                                                               |
|----------------------------------------|----------------------------------------------------|--------------------------------------|-------------------------|--------------------------------------------------------------------------|
| Follow up<br>(longer than 6<br>months) | CBT vs. Attention Control or<br>Treatment as Usual | Primary Anxiety, Clinician<br>report | Longer than 6<br>months | SMD: -0.06; 95% CI: -0.50 to<br>0.38; $I^2=N/A$ <sup>88</sup>            |
|                                        |                                                    | Primary Anxiety, Child report        | Longer than 6<br>months | SMD: -0.20; 95% CI: -0.48 to -<br>0.09; $I^2=83.5\%$ <sup>91-93</sup>    |
|                                        |                                                    | Remission                            | Longer than 6<br>months | RR: 1.26; 95% CI: 0.99 to 1.60;<br>$I^2=N/A$ <sup>103</sup>              |
|                                        |                                                    | Response                             | Longer than 6<br>months | RR: 1.40; 95% CI: 0.97 to 2.04;<br>$I^2=N/A$ <sup>92,93</sup>            |
|                                        | CBT vs. Waitlisting or No Treatment                | Primary Anxiety, Clinician<br>report | Longer than 6<br>months | SMD: -0.59; 95% CI: -1.31 to -<br>0.13; $I^2=0.0\%$ <sup>29,49,69</sup>  |
|                                        |                                                    | Primary Anxiety, Child report        | Longer than 6<br>months | SMD: -0.08; 95% CI: -0.56 to<br>0.39; $I^2=0.0\%$ <sup>29,44,49,69</sup> |
|                                        |                                                    | Primary Anxiety, Parent<br>report    | Longer than 6<br>months | SMD: -1.55; 95% CI: -8.38 to<br>5.28; $I^2=96.1\%$ <sup>49,58,69</sup>   |
|                                        |                                                    | Remission                            | Longer than 6<br>months | RR: 0.71; 95% CI: 0.57 to 1.03;<br>$I^2=N/A$ <sup>29</sup>               |

CBT: cognitive behavioral therapy, CI: confidence interval, N/A: not applicable, RR: risk ratio, SMD: standardized mean difference

## eReferences.

1. Abikoff H, McGough J, Vitiello B, et al. Sequential pharmacotherapy for children with comorbid attention-deficit/hyperactivity and anxiety disorders. *J Am Acad Child Adolesc Psychiatry*. 2005;44(5):418-427.
2. Black B, Uhde TW. Treatment of elective mutism with fluoxetine: a double-blind, placebo-controlled study. *J Am Acad Child Adolesc Psychiatry*. 1994;33(7):1000-1006.
3. Birmaher B, Axelson DA, Monk K, et al. Fluoxetine for the treatment of childhood anxiety disorders. *J Am Acad Child Adolesc Psychiatry*. 2003;42(4):415-423.
4. da Costa CZ, de Morais RM, Zanetta DM, et al. Comparison among clomipramine, fluoxetine, and placebo for the treatment of anxiety disorders in children and adolescents. *J Child Adolesc Psychopharmacol*. 2013;23(10):687-692.
5. Geller D, Donnelly C, Lopez F, et al. Atomoxetine treatment for pediatric patients with attention-deficit/hyperactivity disorder with comorbid anxiety disorder. *J Am Acad Child Adolesc Psychiatry*. 2007;46(9):1119-1127.
6. Gittelman K, Rachel, Klein, Donald F. School phobia: Diagnostic considerations in the light of imipramine effects. *Journal of Nervous and Mental Disease*. 1973;156(3):199-215.
7. Graae F, Milner J, Rizzotto L, Klein RG. Clonazepam in childhood anxiety disorders. *J Am Acad Child Adolesc Psychiatry*. 1994;33(3):372-376.
8. March JS, Entusah AR, Rynn M, Albano AM, Tourian KA. A Randomized controlled trial of venlafaxine ER versus placebo in pediatric social anxiety disorder. *Biol Psychiatry*. 2007;62(10):1149-1154.
9. Pine, D S, Walkup, et al. Fluvoxamine for the treatment of anxiety disorders in children and adolescents. *New England Journal of Medicine*. 2001;344(17):1279-1285.
10. Reinblatt SP, Riddle MA. Selective serotonin reuptake inhibitor-induced apathy: a pediatric case series. *J Child Adolesc Psychopharmacol*. 2006;16(1-2):227-233.
11. Reinblatt SP, DosReis S, Walkup JT, Riddle MA. Activation adverse events induced by the selective serotonin reuptake inhibitor fluvoxamine in children and adolescents. *J Child Adolesc Psychopharmacol*. 2009;19(2):119-126.
12. Rynn MA, Siqueland L, Rickels K. Placebo-controlled trial of sertraline in the treatment of children with generalized anxiety disorder. *Am J Psychiatry*. 2001;158(12):2008-2014.
13. Rynn MA, Riddle MA, Yeung PP, Kunz NR. Efficacy and safety of extended-release venlafaxine in the treatment of generalized anxiety disorder in children and adolescents: two placebo-controlled trials. *Am J Psychiatry*. 2007;164(2):290-300.
14. Strawn JR, Prakash A, Zhang Q, et al. A randomized, placebo-controlled study of duloxetine for the treatment of children and adolescents with generalized anxiety disorder. *J Am Acad Child Adolesc Psychiatry*. 2015;54(4):283-293.
15. Wagner, K, Berard, et al. A multicenter, randomized, double-blind, placebo-controlled trial of paroxetine in children and adolescents with social anxiety disorder. *Archives of General Psychiatry*. 2004;61(11):1153-1162.
16. Walkup J, Labellarte M, Riddle MA, et al. Treatment of pediatric anxiety disorders: an open-label extension of the research units on pediatric psychopharmacology anxiety study. *J Child Adolesc Psychopharmacol*. 2002;12(3):175-188.
17. Walkup JT, Albano AM, Piacentini J, et al. Cognitive behavioral therapy, sertraline, or a combination in childhood anxiety. *N Engl J Med*. 2008;359(26):2753-2766.
18. Ginsburg GS, Kendall PC, Sakolsky D, et al. Remission after acute treatment in children and adolescents with anxiety disorders: findings from the CAMS. *J Consult Clin Psychol*. 2011;79(6):806-813.
19. Gonzalez A, Peris TS, Vreeland A, et al. Parental anxiety as a predictor of medication and CBT response for anxious youth. *Child Psychiatry Hum Dev*. 2015;46(1):84-93.
20. Keeton CP, Ginsburg GS, Drake KL, et al. Benefits of child-focused anxiety treatments for parents and family functioning. *Depress Anxiety*. 2013;30(9):865-872.
21. Nail, Jennifer E, Christofferson, et al. Academic impairment and impact of treatments among youth with anxiety disorders. *Child & Youth Care Forum*. 2015;44(3):327-342.
22. Piacentini J, Bennett S, Compton SN, et al. 24- and 36-week outcomes for the Child/Adolescent Anxiety Multimodal Study (CAMS). *J Am Acad Child Adolesc Psychiatry*. 2014;53(3):297-310.
23. Rynn MA, Walkup JT, Compton SN, et al. Child/Adolescent anxiety multimodal study: evaluating safety. *J Am Acad Child Adolesc Psychiatry*. 2015;54(3):180-190.

24. Beidel DC, Turner SM, Sallee FR, Ammerman RT, Crosby LA, Pathak S. SET-C versus fluoxetine in the treatment of childhood social phobia. *J Am Acad Child Adolesc Psychiatry*. 2007;46(12):1622-1632.
25. Abbasi, Z, Amiri, S, Talebi, H. The effective comparison between modular cognitive behavioral therapy (MCBT) and child-parent relationship training (CPRT) in children with separation anxiety symptoms. *Soc Sci*. 2016;11(6):890-902.
26. Afshari A, Neshat-Doost HT, Maracy MR, Ahmady MK, Amiri S. The effective comparison between emotion-focused cognitive behavioral group therapy and cognitive behavioral group therapy in children with separation anxiety disorder. *J Res Med Sci*. 2014;19(3):221-227.
27. Arendt K, Thastum M, Hougaard E. Efficacy of a Danish version of the Cool Kids program: a randomized wait-list controlled trial. *Acta Psychiatr Scand*. 2015;133(2):109-121.
28. Baer S, Garland EJ. Pilot study of community-based cognitive behavioral group therapy for adolescents with social phobia. *J Am Acad Child Adolesc Psychiatry*. 2005;44(3):258-264.
29. Barrett PM, Dadds MR, Rapee RM. Family treatment of childhood anxiety: a controlled trial. *J Consult Clin Psychol*. 1996;64(2):333-342.
30. Barrett PM. Evaluation of cognitive-behavioral group treatments for childhood anxiety disorders. *J Clin Child Psychol*. 1998;27(4):459-468.
31. Bodden DH, Dirksen CD, Bogels SM, et al. Costs and cost-effectiveness of family CBT versus individual CBT in clinically anxious children. *Clin*. 2008;13(4):543-564.
32. Bodden DH, Bogels SM, Nauta MH, et al. Child versus family cognitive-behavioral therapy in clinically anxious youth: an efficacy and partial effectiveness study. *J Am Acad Child Adolesc Psychiatry*. 2008;47(12):1384-1394.
33. Chalfant AM, Rapee R, Carroll L. Treating anxiety disorders in children with high functioning autism spectrum disorders: a controlled trial. *J Autism Dev Disord*. 2007;37(10):1842-1857.
34. Chiu AW, Langer DA, McLeod BD, et al. Effectiveness of modular CBT for child anxiety in elementary schools. *Sch*. 2013;28(2):141-153.
35. Cobham VE. Do anxiety-disordered children need to come into the clinic for efficacious treatment? *J Consult Clin Psychol*. 2012;80(3):465-476.
36. Dewis LM, Kirkby KC, Martin F, Daniels BA, Gilroy LJ, Menzies RG. Computer-aided vicarious exposure versus live graded exposure for spider phobia in children. *J Behav Ther Exp Psychiatry*. 2001;32(1):17-27.
37. Donovan CL, Cobham V, Waters AM, Ochipinti S. Intensive group-based CBT for child social phobia: a pilot study. *Behav Ther*. 2015;46(3):350-364.
38. Flannery S, E C, Kendall, P C. Group and individual cognitive-behavioral treatments for youth with anxiety disorders: A randomized clinical trial. *Cognitive Therapy and Research*. 2000;24(3):251-278.
39. Flannery S, E, Choudhury, M S, Kendall, P C. Group and individual cognitive-behavioral treatments for youth with anxiety disorders: 1-Year follow-up. *Cognitive Therapy and Research*. 2005;29(2):253-259.
40. Gallagher HM, Rabian BA, McCloskey MS. A brief group cognitive-behavioral intervention for social phobia in childhood. *J Anxiety Disord*. 2004;18(4):459-479.
41. Gallo KP, Chan PT, Buzzella BA, Whitton SW, Pincus DB. The impact of an 8-day intensive treatment for adolescent panic disorder and agoraphobia on comorbid diagnoses. *Behav Ther*. 2012;43(1):153-159.
42. Gil B, F, Hernandez G, L. [Cognitive-behavioural treatment in Mexican children with social phobia]. *Anuario de Psicología*. 2009;40(1):89-104.
43. Hancock KM, Swain J, Hainsworth CJ, Dixon AL, Koo S, Munro K. Acceptance and Commitment Therapy versus Cognitive Behavior Therapy for Children With Anxiety: Outcomes of a Randomized Controlled Trial. *J Clin Child Adolesc Psychol*. 2016:1-16.
44. Hayward C, Varady S, Albano AM, Thienemann M, Henderson L, Schatzberg AF. Cognitive-behavioral group therapy for social phobia in female adolescents: results of a pilot study. *J Am Acad Child Adolesc Psychiatry*. 2000;39(6):721-726.
45. Holmes MC, Donovan CL, Farrell LJ, March S. The efficacy of a group-based, disorder-specific treatment program for childhood GAD--a randomized controlled trial. *Behav Res Ther*. 2014;61:122-135.
46. Hirshfeld-Becker DR, Masek B, Henin A, et al. Cognitive behavioral therapy for 4- to 7-year-old children with anxiety disorders: a randomized clinical trial. *J Consult Clin Psychol*. 2010;78(4):498-510.
47. Kendall, P C. Treating anxiety disorders in children: results of a randomized clinical trial. *Annual Progress in Child Psychiatry and Child Development*. 1995.
48. Kendall PC, Flannery-Schroeder E, Panichelli-Mindel SM, Southam-Gerow M, Henin A, Warman M. Therapy for youths with anxiety disorders: a second randomized clinical trial. *J Consult Clin Psychol*. 1997;65(3):366-380.

49. Lee SS, Victor AM, James MG, Roach LE, Bernstein GA. School-Based Interventions for Anxious Children: Long-Term Follow-Up. *Child Psychiatry Hum Dev.* 2016;47(2):183-193.
50. Leutgeb V, Schienle A. Changes in facial electromyographic activity in spider-phobic girls after psychotherapy. *J Psychiatr Res.* 2012;46(6):805-810.
51. Masia-Warner C, Klein RG, Dent HC, et al. School-based intervention for adolescents with social anxiety disorder: results of a controlled study. *J Abnorm Child Psychol.* 2005;33(6):707-722.
52. McConachie H, McLaughlin E, Grahame V, et al. Group therapy for anxiety in children with autism spectrum disorder. *Autism.* 2014;18(6):723-732.
53. McNally Keehn RH, Lincoln AJ, Brown MZ, Chavira DA. The Coping Cat program for children with anxiety and autism spectrum disorder: a pilot randomized controlled trial. *J Autism Dev Disord.* 2013;43(1):57-67.
54. Melfsen S, Kuhnemund M, Schwieger J, et al. Cognitive behavioral therapy of socially phobic children focusing on cognition: a randomised wait-list control study. *Child Adolesc Psychiatry Ment Health.* 2011;5(1):5.
55. Mendlowitz SL, Manassis K, Bradley S, Scapillato D, Miezitis S, Shaw BF. Cognitive-behavioral group treatments in childhood anxiety disorders: the role of parental involvement. *J Am Acad Child Adolesc Psychiatry.* 1999;38(10):1223-1229.
56. Menzies RG, Clarke JC. A comparison of in vivo and vicarious exposure in the treatment of childhood water phobia. *Behav Res Ther.* 1993;31(1):9-15.
57. Miller LC, Barrett CL, Hampe E, Noble H. Comparison of reciprocal inhibition, psychotherapy, and waiting list control for phobic children. *J Abnorm Psychol.* 1972;79(3):269-279.
58. Hampe E, Noble H, Miller LC, Barrett CL. Phobic children one and two years posttreatment. *J Abnorm Psychol.* 1973;82(3):446-453.
59. Nauta MH, Scholing A, Emmelkamp PM, Minderaa RB. Cognitive-behavioral therapy for children with anxiety disorders in a clinical setting: no additional effect of a cognitive parent training. *J Am Acad Child Adolesc Psychiatry.* 2003;42(11):1270-1278.
60. Olivares, J, Garcia L, et al. Results at long-term among three psychological treatments for adolescents with generalized social phobia (I): Statistical significance. *Psicologia Conductual.* 2002;10(1):147-164.
61. Olivares J, Olivares-Olivares PJ, Rosa-Alcazar AI, Montesinos L, Macia D. The contribution of the therapist's competence in the treatment of adolescents with generalized social phobia. *Psicothema.* 2014;26(4):483-489.
62. Ollendick TH, Ost LG, Reuterskiold L, et al. One-session treatment of specific phobias in youth: a randomized clinical trial in the United States and Sweden. *J Consult Clin Psychol.* 2009;77(3):504-516.
63. Ost LG, Svensson L, Hellstrom K, Lindwall R. One-Session treatment of specific phobias in youths: a randomized clinical trial. *J Consult Clin Psychol.* 2001;69(5):814-824.
64. Ost, L G, Cederlund, R, Reuterskiold, L. Behavioral treatment of social phobia in youth: Does parent education training improve the outcome? *Behaviour Research and Therapy.* 2015;67:19-29.
65. Rapee, Ronald M. Group treatment of children with anxiety disorders: Outcome and predictors of treatment response. *Australian Journal of Psychology.* 2000;52(3):125-129.
66. Rapee RM, Abbott MJ, Lyneham HJ. Bibliotherapy for children with anxiety disorders using written materials for parents: A randomized controlled trial. *J Consult Clin Psychol.* 2006;74(3):436-444.
67. Reaven, J A, Blakeley S, et al. Cognitive-behavioral group treatment for anxiety symptoms in children with high-functioning autism spectrum disorders: A pilot study. *Focus on Autism and Other Developmental Disabilities.* 2009;24(1):27-37.
68. Ritter B. The group desensitization of children's snake phobias using vicarious and contact desensitization procedures. *Behav Res Ther.* 1968;6(1):1-6.
69. Rosa A, Ana I, Olivares O, Pablo J, Olivares, Jose. The role of non-specific effects in the psychological treatment of adolescents with social phobia. *Anuario de Psicología.* 2009;40(1):43-61.
70. Rodriguez, J O, Alcazar, A I, Rodriguez, J A. Early detection and treatment of adolescents with generalized social phobia. *Psicothema.* 2005;17(1):1-8.
71. Sanchez-Garcia R, Olivares J. Effectiveness of a program for early detection/intervention in children/adolescents with generalized social phobia. *An Psicol-Spain.* 2009;25(2):241-249.
72. Sánchez G, Raquel, Rodríguez, José O. Intervención temprana en niños y adolescentes con fobia social. *Anuario de psicología/The UB Journal of psychology.* 2009;40(1):75-88.
73. Santucci LC, Ehrenreich-May J. A randomized controlled trial of the child anxiety multi-day program (CAMP) for separation anxiety disorder. *Child Psychiatry Hum Dev.* 2013;44(3):439-451.

74. Schneider S, Blatter-Meunier J, Herren C, Adornetto C, In-Albon T, Lavallee K. Disorder-specific cognitive-behavioral therapy for separation anxiety disorder in young children: a randomized waiting-list-controlled trial. *Psychother Psychosom.* 2011;80(4):206-215.
75. Shortt AL, Barrett PM, Fox TL. Evaluating the FRIENDS program: a cognitive-behavioral group treatment for anxious children and their parents. *J Clin Child Psychol.* 2001;30(4):525-535.
76. Silverman WK, Kurtines WM, Ginsburg GS, Weems CF, Lumpkin PW, Carmichael DH. Treating anxiety disorders in children with group cognitive-behavioral therapy: a randomized clinical trial. *J Consult Clin Psychol.* 1999;67(6):995-1003.
77. Spence SH, Donovan C, Brechman-Toussaint M. The treatment of childhood social phobia: the effectiveness of a social skills training-based, cognitive-behavioural intervention, with and without parental involvement. *J Child Psychol Psychiatry.* 2000;41(6):713-726.
78. Spence SH, Holmes JM, March S, Lipp OV. The feasibility and outcome of clinic plus internet delivery of cognitive-behavior therapy for childhood anxiety. *J Consult Clin Psychol.* 2006;74(3):614-621.
79. Spence SH, Donovan CL, March S, et al. A randomized controlled trial of online versus clinic-based CBT for adolescent anxiety. *J Consult Clin Psychol.* 2011;79(5):629-642.
80. Waters AM, Ford LA, Wharton TA, Cobham VE. Cognitive-behavioural therapy for young children with anxiety disorders: Comparison of a Child + Parent condition versus a Parent Only condition. *Behav Res Ther.* 2009;47(8):654-662.
81. Warner CM, Colognori D, Kim RE, et al. Cognitive-behavioral treatment of persistent functional somatic complaints and pediatric anxiety: an initial controlled trial. *Depress Anxiety.* 2011;28(7):551-559.
82. Wergeland GJ, Fjermestad KW, Marin CE, et al. An effectiveness study of individual vs. group cognitive behavioral therapy for anxiety disorders in youth. *Behav Res Ther.* 2014;57:1-12.
83. Wergeland GJ, Fjermestad KW, Marin CE, et al. Predictors of treatment outcome in an effectiveness trial of cognitive behavioral therapy for children with anxiety disorders. *Behav Res Ther.* 2016;76:1-12.
84. White SW, Ollendick T, Albano AM, et al. Randomized controlled trial: Multimodal Anxiety and Social Skill Intervention for adolescents with autism spectrum disorder. *J Autism Dev Disord.* 2013;43(2):382-394.
85. Wood JJ, Drahota A, Sze K, Har K, Chiu A, Langer DA. Cognitive behavioral therapy for anxiety in children with autism spectrum disorders: a randomized, controlled trial. *J Child Psychol Psychiatry.* 2009;50(3):224-234.
86. Ginsburg GS, Drake KL. School-based treatment for anxious african-american adolescents: a controlled pilot study. *J Am Acad Child Adolesc Psychiatry.* 2002;41(7):768-775.
87. Ginsburg GS, Becker KD, Drazdowski TK, Tein JY. Treating Anxiety Disorders in Inner City Schools: Results from a Pilot Randomized Controlled Trial Comparing CBT and Usual Care. *Child Youth Care Forum.* 2012;41(1):1-19.
88. Halldorsdottir T, Ollendick TH. Long-term outcomes of brief, intensive CBT for specific phobias: The negative impact of ADHD symptoms. *J Consult Clin Psychol.* 2016;84(5):465-471.
89. Herbert JD, Gaudiano BA, Rheingold AA, et al. Cognitive behavior therapy for generalized social anxiety disorder in adolescents: a randomized controlled trial. *J Anxiety Disord.* 2009;23(2):167-177.
90. Hudson JL, Rapee RM, Deveney C, Schniering CA, Lyneham HJ, Bovopoulos N. Cognitive-behavioral treatment versus an active control for children and adolescents with anxiety disorders: a randomized trial. *J Am Acad Child Adolesc Psychiatry.* 2009;48(5):533-544.
91. Ingul JM, Aune T, Nordahl HM. A randomized controlled trial of individual cognitive therapy, group cognitive behaviour therapy and attentional placebo for adolescent social phobia. *Psychother Psychosom.* 2014;83(1):54-61.
92. Kendall PC, Hudson JL, Gosch E, Flannery-Schroeder E, Suveg C. Cognitive-behavioral therapy for anxiety disordered youth: a randomized clinical trial evaluating child and family modalities. *J Consult Clin Psychol.* 2008;76(2):282-297.
93. Khanna MS, Kendall PC. Exploring the role of parent training in the treatment of childhood anxiety. *J Consult Clin Psychol.* 2009;77(5):981-986.
94. Khanna MS, Kendall PC. Computer-assisted cognitive behavioral therapy for child anxiety: results of a randomized clinical trial. *J Consult Clin Psychol.* 2010;78(5):737-745.
95. Last CG, Hansen C, Franco N. Cognitive-behavioral treatment of school phobia. *J Am Acad Child Adolesc Psychiatry.* 1998;37(4):404-411.
96. Masia Warner C, Fisher PH, ShROUT PE, Rathor S, Klein RG. Treating adolescents with social anxiety disorder in school: an attention control trial. *J Child Psychol Psychiatry.* 2007;48(7):676-686.

97. Muris, P, Meesters, C, Gobel, M. Cognitive coping vs emotional disclosure in the treatment of anxious children: A pilot-study. *Cognitive Behaviour Therapy*. 2002;31(2):59-67.
98. O'Brien, F, Olden, et al. Group cognitive behavioural therapy for children with anxiety disorder - An evaluation of the 'Friends for Youth' programme. *Irish Journal of Psychological Medicine*. 2007;24(1):5-12.
99. Pincus DB, May JE, Whitton SW, Mattis SG, Barlow DH. Cognitive-behavioral treatment of panic disorder in adolescence. *J Clin Child Adolesc Psychol*. 2010;39(5):638-649.
100. Reigada, Laura C, Polokowski, et al. Treatment for comorbid pediatric gastrointestinal and anxiety disorders: A pilot study of a flexible health sensitive cognitive-behavioral therapy program. *Clinical Practice in Pediatric Psychology*. 2015;3(4):314-326.
101. Rosa A, Ana I, Olivares R, Jose, Olivares O, Pablo. The role of planned interaction in the treatment of generalized social phobia. *Terapia Psicologica*. 2007;25(2):205-212.
102. Southam-Gerow MA, Weisz JR, Chu BC, McLeod BD, Gordis EB, Connor-Smith JK. Does cognitive behavioral therapy for youth anxiety outperform usual care in community clinics? An initial effectiveness test. *J Am Acad Child Adolesc Psychiatry*. 2010;49(10):1043-1052.
103. Silk JS, Tan PZ, Ladouceur CD, et al. A Randomized Clinical Trial Comparing Individual Cognitive Behavioral Therapy and Child-Centered Therapy for Child Anxiety Disorders. *J Clin Child Adolesc Psychol*. 2016:1-13.
104. Masia W, Carrie, Colognori, et al. Can school counselors deliver cognitive-behavioral treatment for social anxiety effectively? A randomized controlled trial. *Journal of Child Psychology and Psychiatry*. 2016:No Pagination Specified.
105. Yen CF, Chen YM, Cheng JW, et al. Effects of cognitive-behavioral therapy on improving anxiety symptoms, behavioral problems and parenting stress in Taiwanese children with anxiety disorders and their mothers. *Child Psychiatry Hum Dev*. 2014;45(3):338-347.
106. Bernstein GA, Borchardt CM, Perwien AR, et al. Imipramine plus cognitive-behavioral therapy in the treatment of school refusal. *J Am Acad Child Adolesc Psychiatry*. 2000;39(3):276-283.
107. Klein RG, Koplewicz HS, Kanner A. Imipramine treatment of children with separation anxiety disorder. *J Am Acad Child Adolesc Psychiatry*. 1992;31(1):21-28.
108. Melvin GA, Dudley AL, Gordon MS, et al. Augmenting Cognitive Behavior Therapy for School Refusal with Fluoxetine: A Randomized Controlled Trial. *Child Psychiatry Hum Dev*. 2016.
109. Biederman J. Clonazepam in the treatment of prepubertal children with panic-like symptoms. *J Clin Psychiatry*. 1987;48 Suppl:38-42.
110. Birmaher B, Waterman GS, Ryan N, et al. Fluoxetine for childhood anxiety disorders. *J Am Acad Child Adolesc Psychiatry*. 1994;33(7):993-999.
111. Chavira DA, Stein MB. Combined psychoeducation and treatment with selective serotonin reuptake inhibitors for youth with generalized social anxiety disorder. *J Child Adolesc Psychopharmacol*. 2002;12(1):47-54.
112. Chutko, L S, Surushkina, et al. Treatment of anxiety disorders in school maladaptation with adaptol. *Neuroscience and Behavioral Physiology*. 2011;41(5):520-524.
113. Compton SN, Grant PJ, Chrisman AK, Gammon PJ, Brown VL, March JS. Sertraline in children and adolescents with social anxiety disorder: an open trial. *J Am Acad Child Adolesc Psychiatry*. 2001;40(5):564-571.
114. D'Amato G. Chlordiazepoxide in management of school phobia. *Dis Nerv Syst*. 1962;23:292-295.
115. Dummit ES, 3rd, Klein RG, Tancer NK, Asche B, Martin J. Fluoxetine treatment of children with selective mutism: an open trial. *J Am Acad Child Adolesc Psychiatry*. 1996;35(5):615-621.
116. Fairbanks JM, Pine DS, Tancer NK, et al. Open fluoxetine treatment of mixed anxiety disorders in children and adolescents. *J Child Adolesc Psychopharmacol*. 1997;7(1):17-29.
117. Isolan L, Pheula G, Salum GA, Jr., Oswald S, Rohde LA, Manfro GG. An open-label trial of escitalopram in children and adolescents with social anxiety disorder. *J Child Adolesc Psychopharmacol*. 2007;17(6):751-760.
118. Karabekiroglu K, Karakurt MN, Yuce M, Say GNT. Fluoxetine for the Treatment of Childhood and Adolescence Social Phobia: Factors playing a role in Efficacy. *Klin Psikofarmakol B*. 2011;21(4):317-324.
119. Lepola U, Leinonen E, Koponen H. Citalopram in the treatment of early-onset panic disorder and school phobia. *Pharmacopsychiatry*. 1996;29(1):30-32.
120. Mancini C, Van Ameringen M, Oakman JM, Farvolden P. Serotonergic agents in the treatment of social phobia in children and adolescents: a case series. *Depress Anxiety*. 1999;10(1):33-39.

121. Masi G, Toni C, Mucci M, Millepiedi S, Mata B, Perugi G. Paroxetine in child and adolescent outpatients with panic disorder. *J Child Adolesc Psychopharmacol*. 2001;11(2):151-157.
122. Mrakotsky C, Masek B, Biederman J, et al. Prospective open-label pilot trial of mirtazapine in children and adolescents with social phobia. *J Anxiety Disord*. 2008;22(1):88-97.
123. Renaud J, Birmaher B, Wassick SC, Bridge J. Use of selective serotonin reuptake inhibitors for the treatment of childhood panic disorder: a pilot study. *J Child Adolesc Psychopharmacol*. 1999;9(2):73-83.
124. Simeon JG, Ferguson HB. Alprazolam effects in children with anxiety disorders. *Can J Psychiatry*. 1987;32(7):570-574.
125. Simeon JG, Knott VJ, Dubois C, et al. Buspirone Therapy of Mixed Anxiety Disorders in Childhood and Adolescence - a Pilot-Study. *J Child Adol Psychop*. 1994;4(3):159-170.
126. Zwier KJ, Rao U. Buspirone use in an adolescent with social phobia and mixed personality disorder (cluster A type). *J Am Acad Child Adolesc Psychiatry*. 1994;33(7):1007-1011.
127. Gonzalez, A, Peris, et al. Parental Anxiety as a Predictor of Medication and CBT Response for Anxious Youth. *Child Psychiatry Hum Dev*. 2014:1-10.
128. Muris P, Meesters C, van Melick M. Treatment of childhood anxiety disorders: a preliminary comparison between cognitive-behavioral group therapy and a psychological placebo intervention. *J Behav Ther Exp Psychiatry*. 2002;33(3-4):143-158.
129. Alfano CA, Ginsburg GS, Kingery JN. Sleep-related problems among children and adolescents with anxiety disorders. *J Am Acad Child Adolesc Psychiatry*. 2007;46(2):224-232.
130. Eichstedt JA, Tobon JI, Phoenix E, Wolfe VV. Worried no more: The effects of medication status on treatment response to a CBT group for children with anxiety in a community setting. *Clin*. 2011;16(2):265-277.
131. Spence, Susan H, Donovan, Caroline, Brechman-Toussaint, Margaret. The treatment of childhood social phobia: The effectiveness of a social skills training-based, cognitive-behavioural intervention, with and without parental involvement. *Journal of Child Psychology and Psychiatry*. 2000;41(6):713-726.
132. White IR, Barrett JK, Jackson D, Higgins JP. Consistency and inconsistency in network meta-analysis: model estimation using multivariate meta-regression. *Res Synth Methods*. 2012;3(2):111-125.
133. Olivares R, Jose, Rosa-Alcazar A, Isabel, Olivares-Olivares P, J. The relevance of the individualized attention in the treatment with adolescents under generalized social phobia. *International journal of clinical and health psychology*. 2006;6(3):565-580.
134. Santacruz, I, Mendez, F J, Sanchez M, J. Play therapy applied by parents for children with darkness phobia: comparison of two programmes. *Child & family behavior therapy*. 2006;28(1):19-35.
135. Moller, C, Petermann, U. Short- and long-term effects of a cognitive-behavioural training programme for children with social anxiety. [German]. *Verhaltenstherapie*. 2011;21(1):15-22.
